# Supplementary material
Source: publisher figshare collection journal article supplement (https://diabetesjournals.figshare.com/articles/dataset/_/14555463)

SF 1

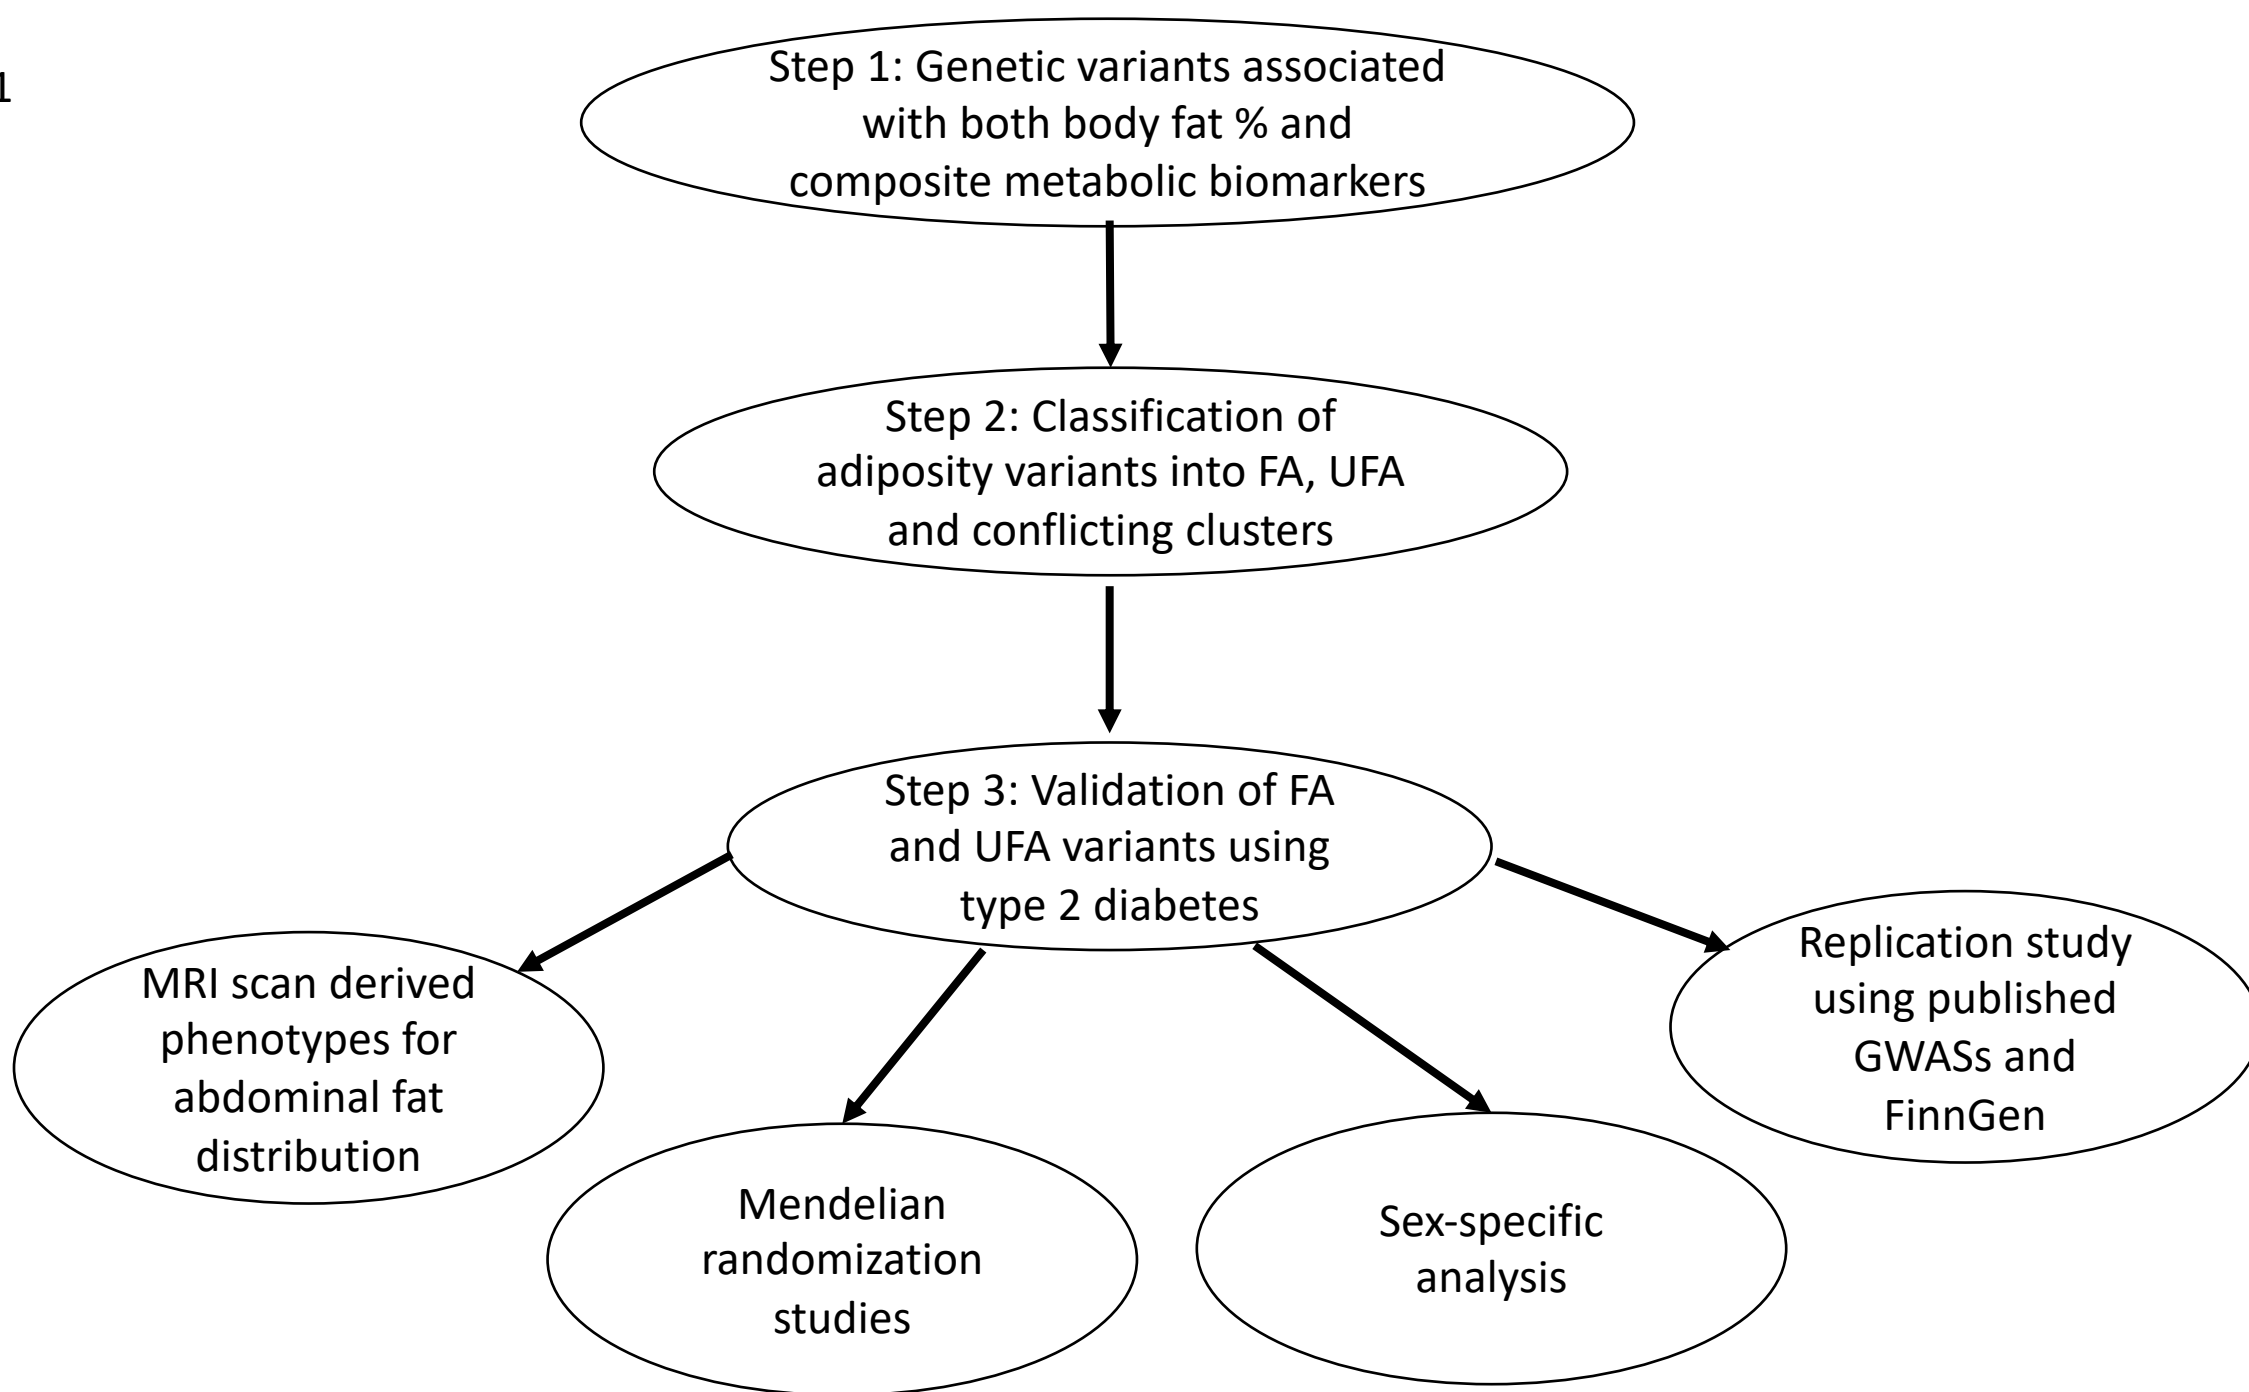

SF 2a

**“Favourable”  
adiposity**

36  
variants

→ *PPARG*

**“Unfavourable”  
adiposity**

38  
variants

→ *FTO*

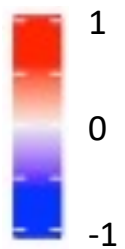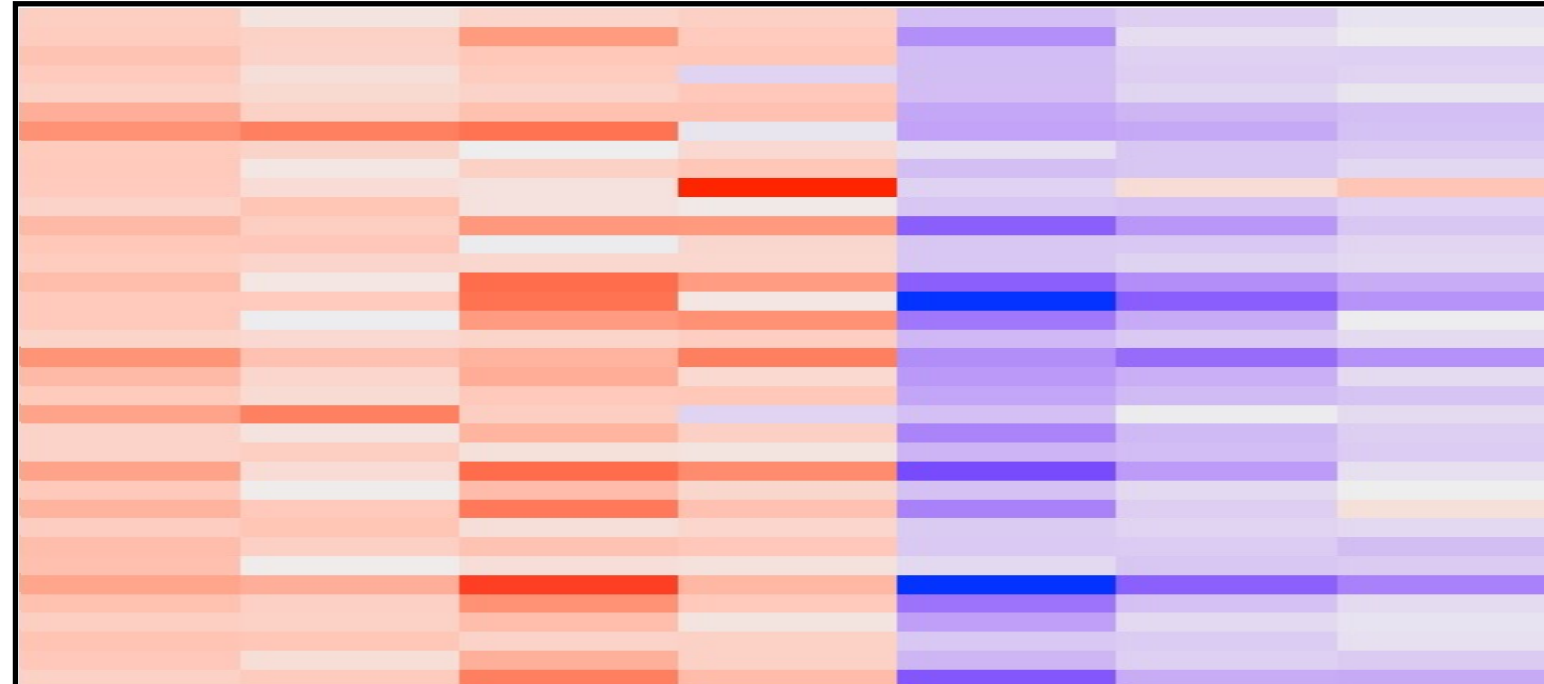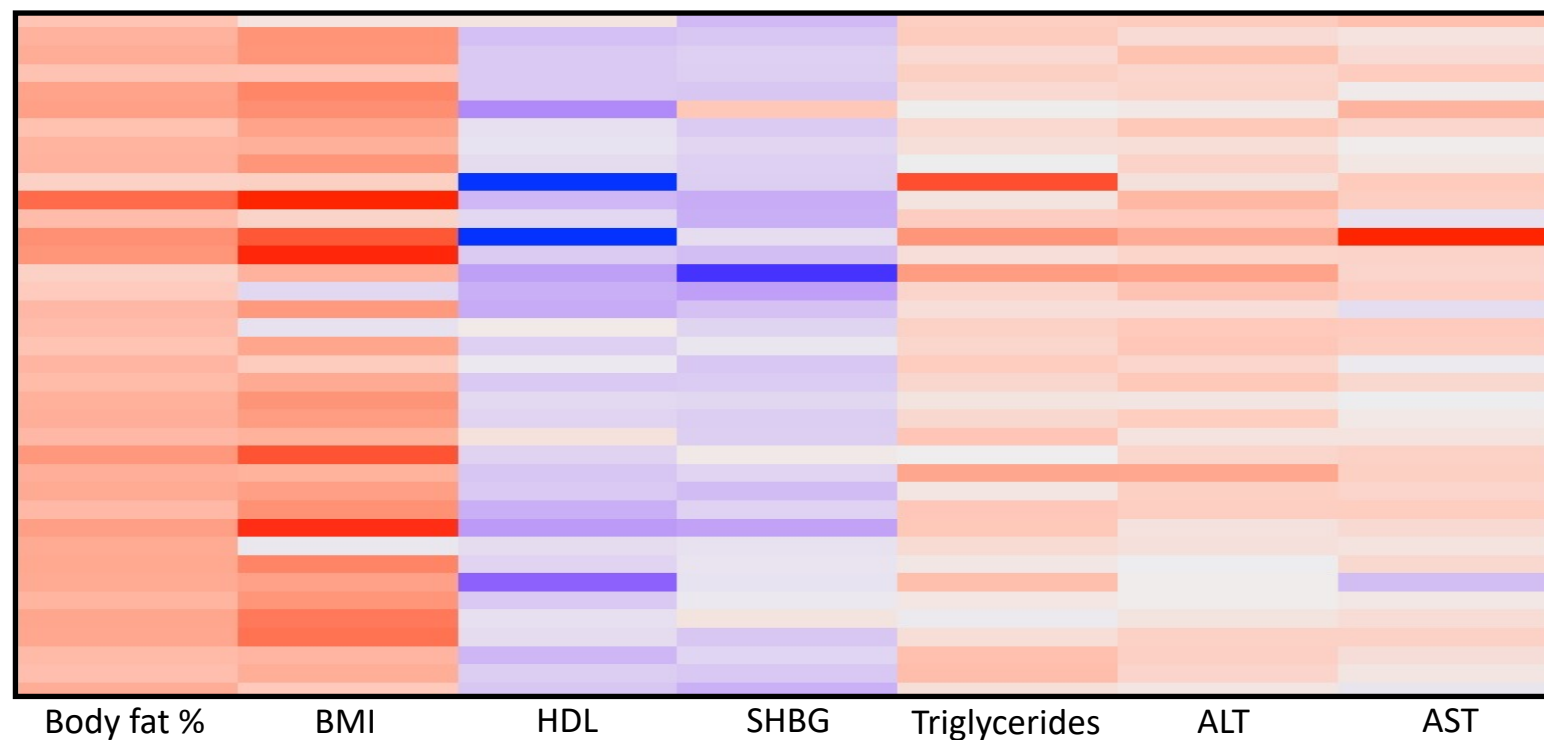

SF 2b

**Conflicting  
cluster**

180  
variants

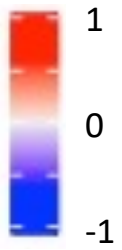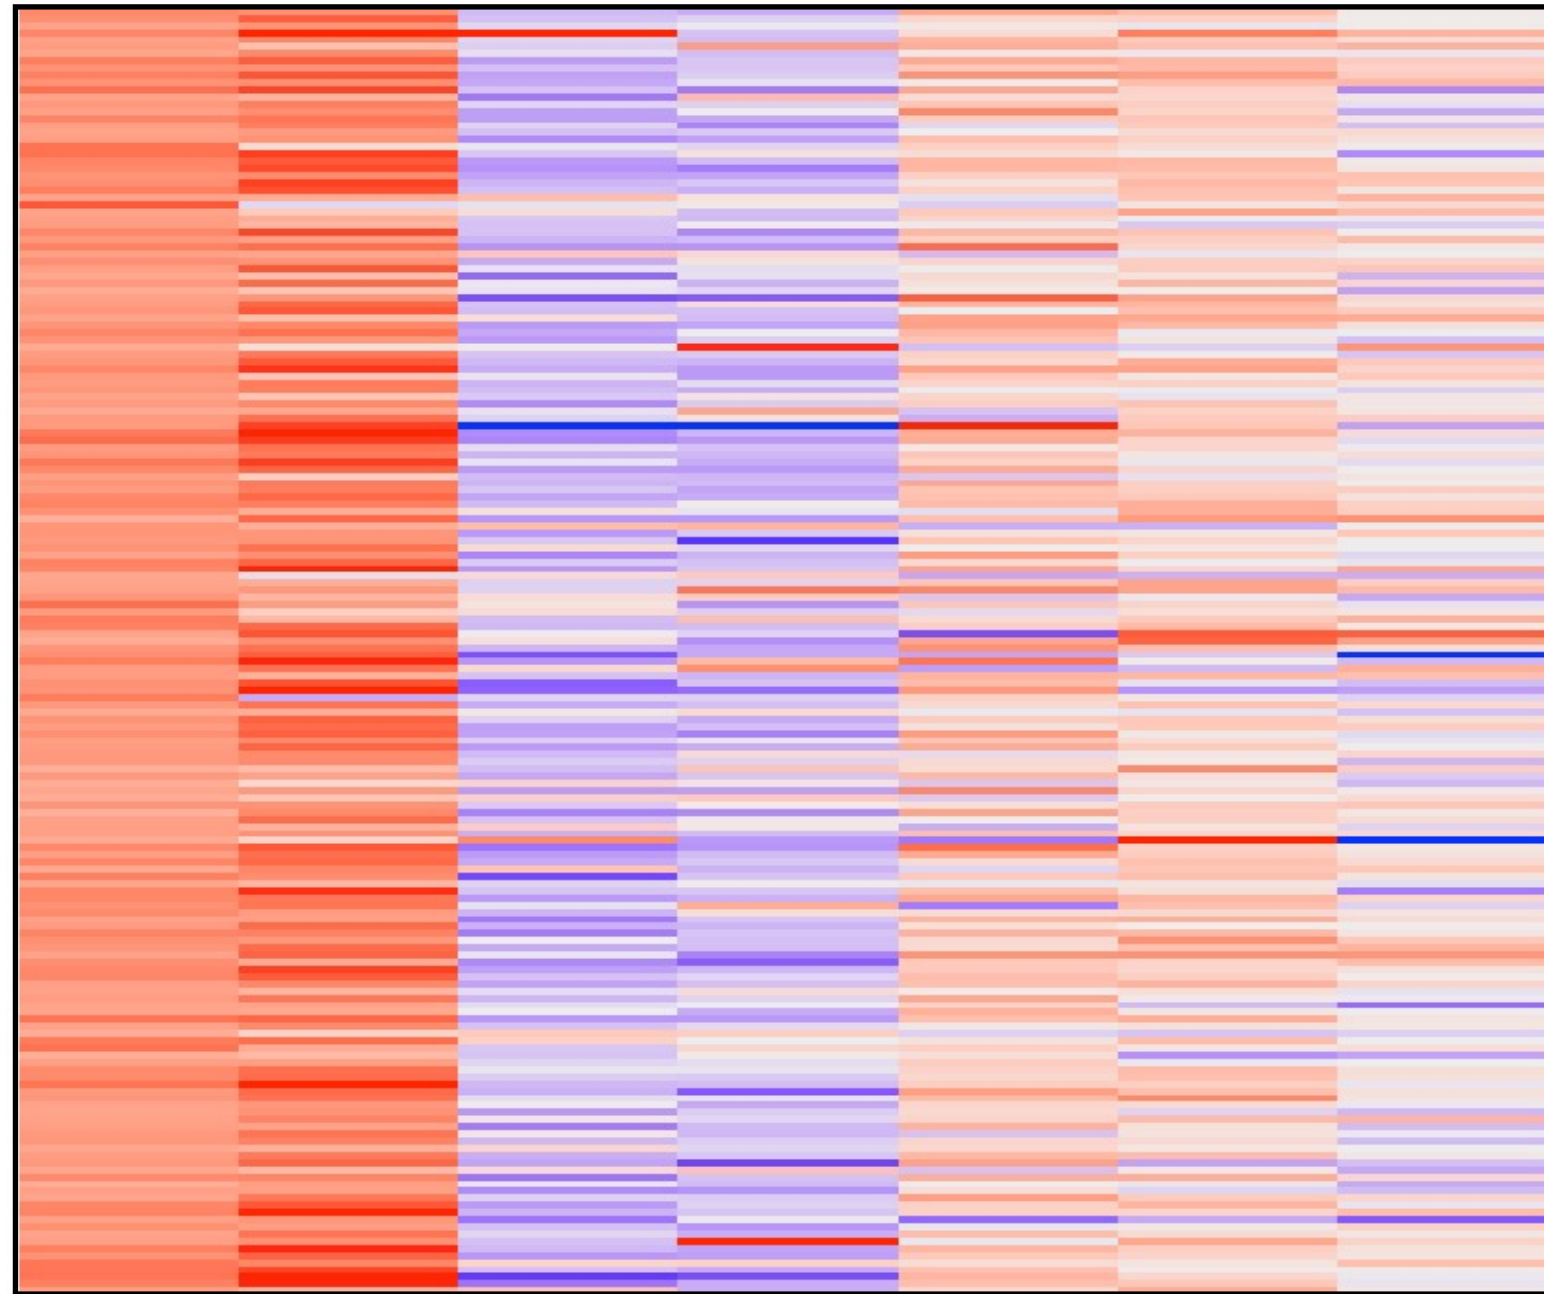

Body fat %

BMI

HDL

SHBG

Triglycerides

ALT

AST

SF 3a

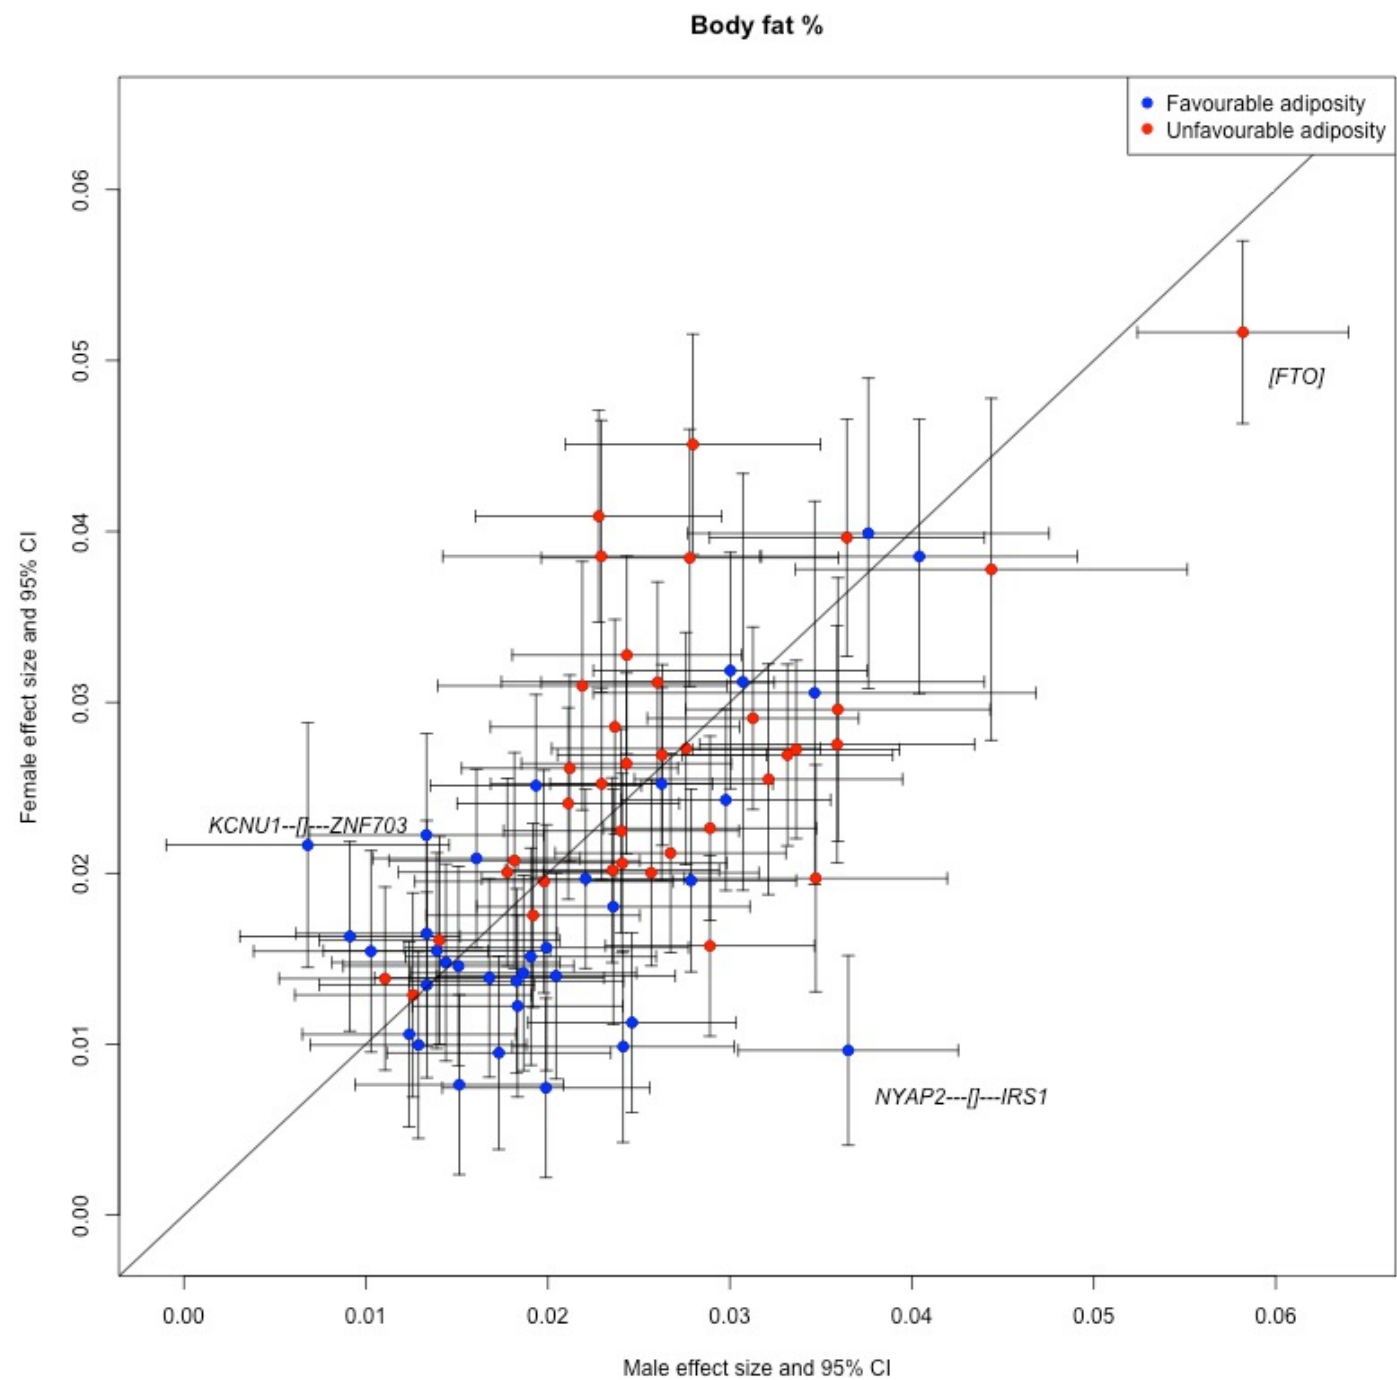

SF 3b

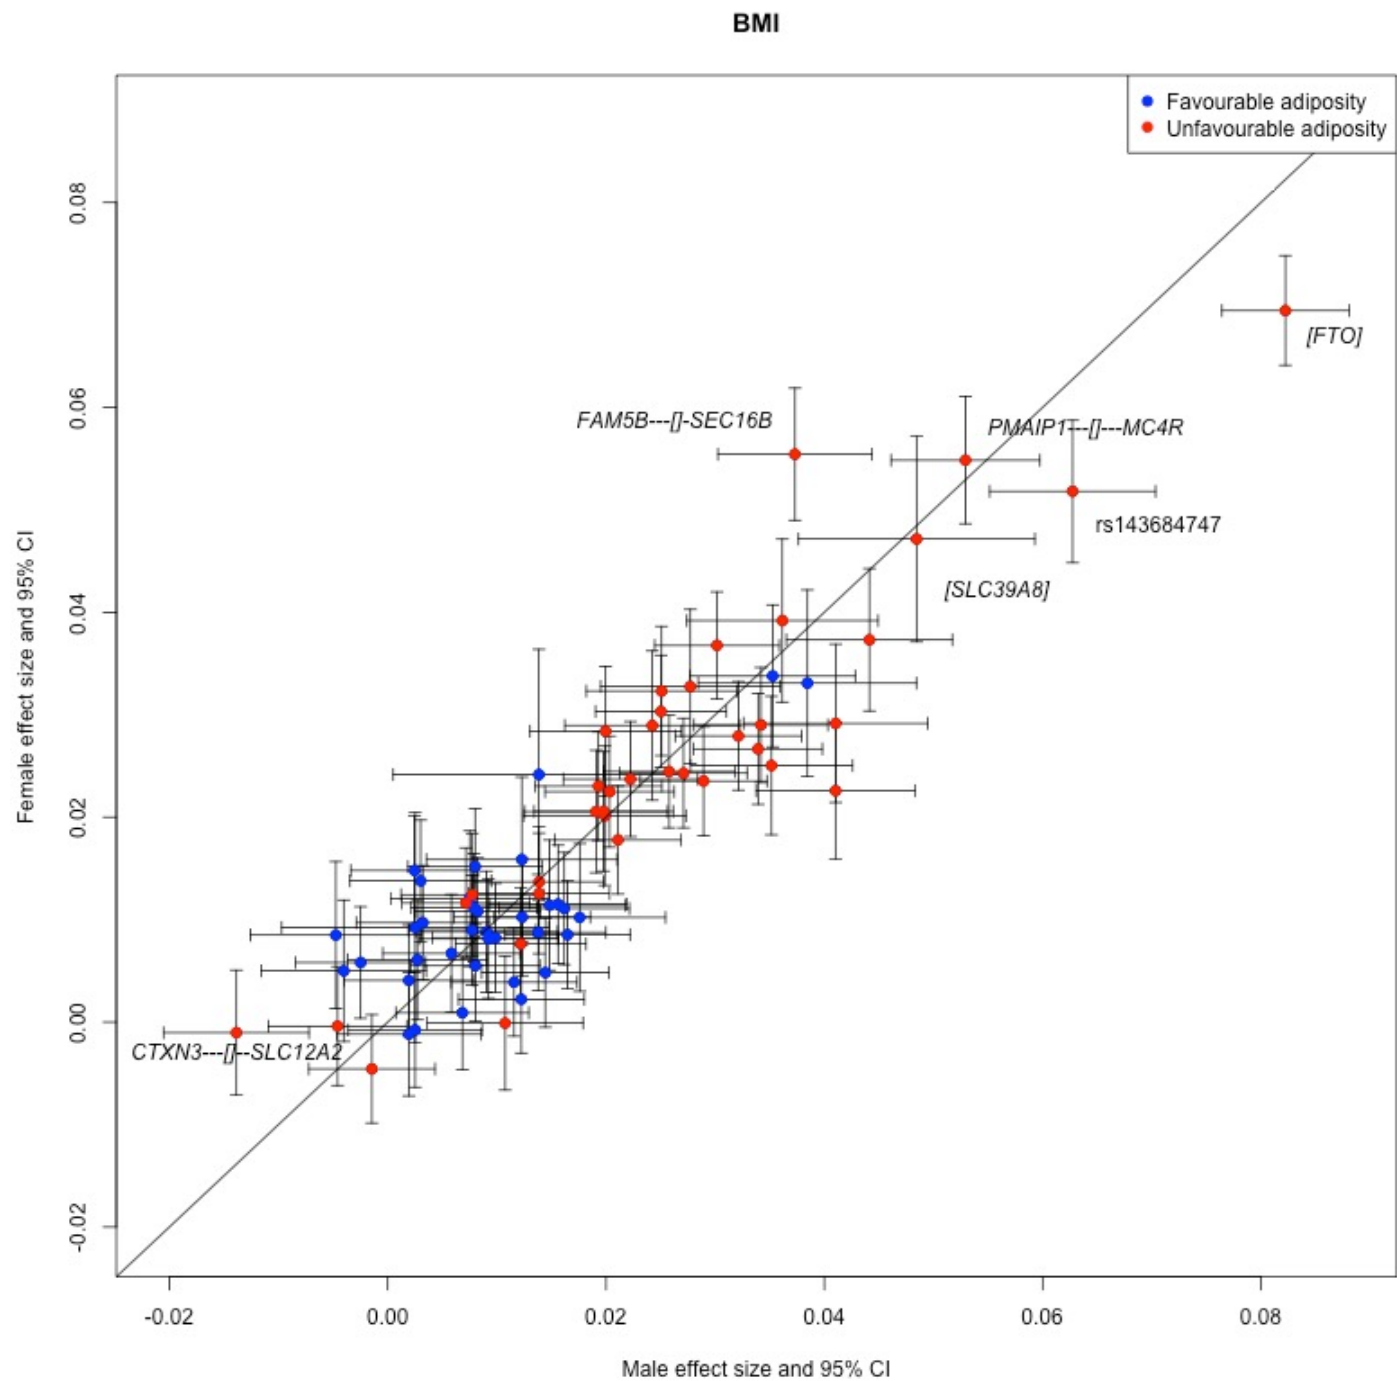

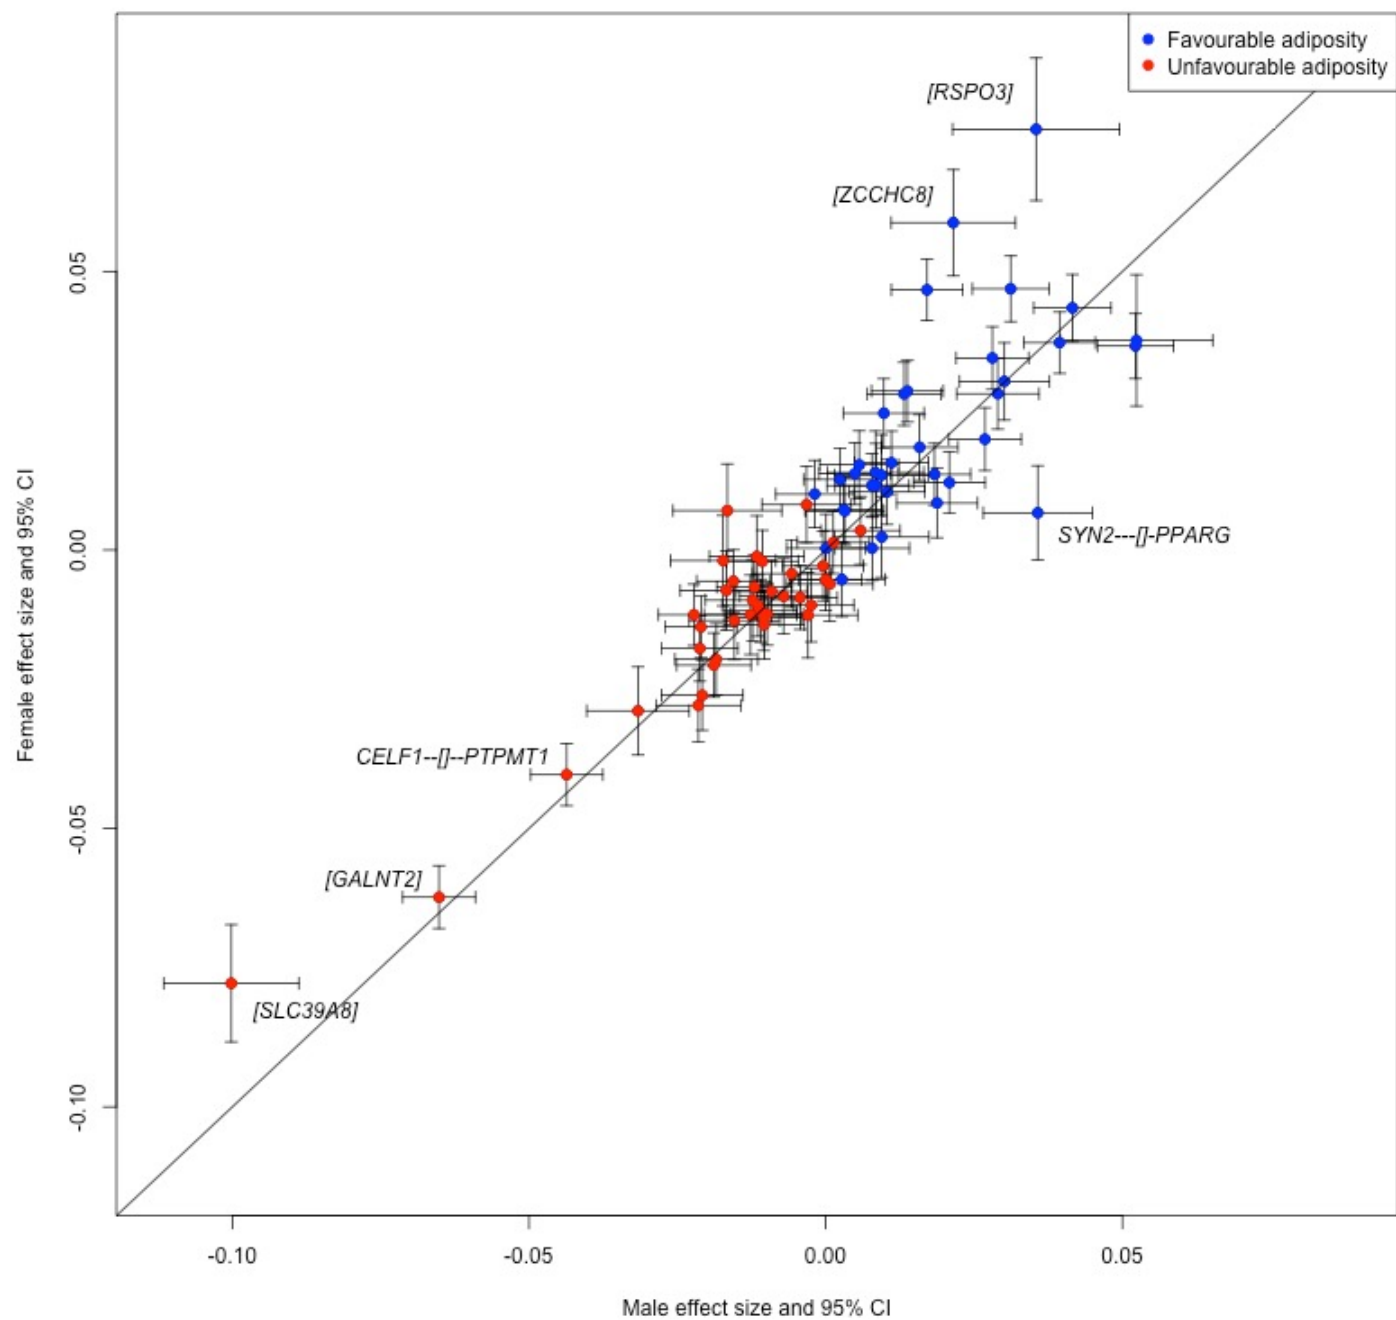

SF 3d

SHBG

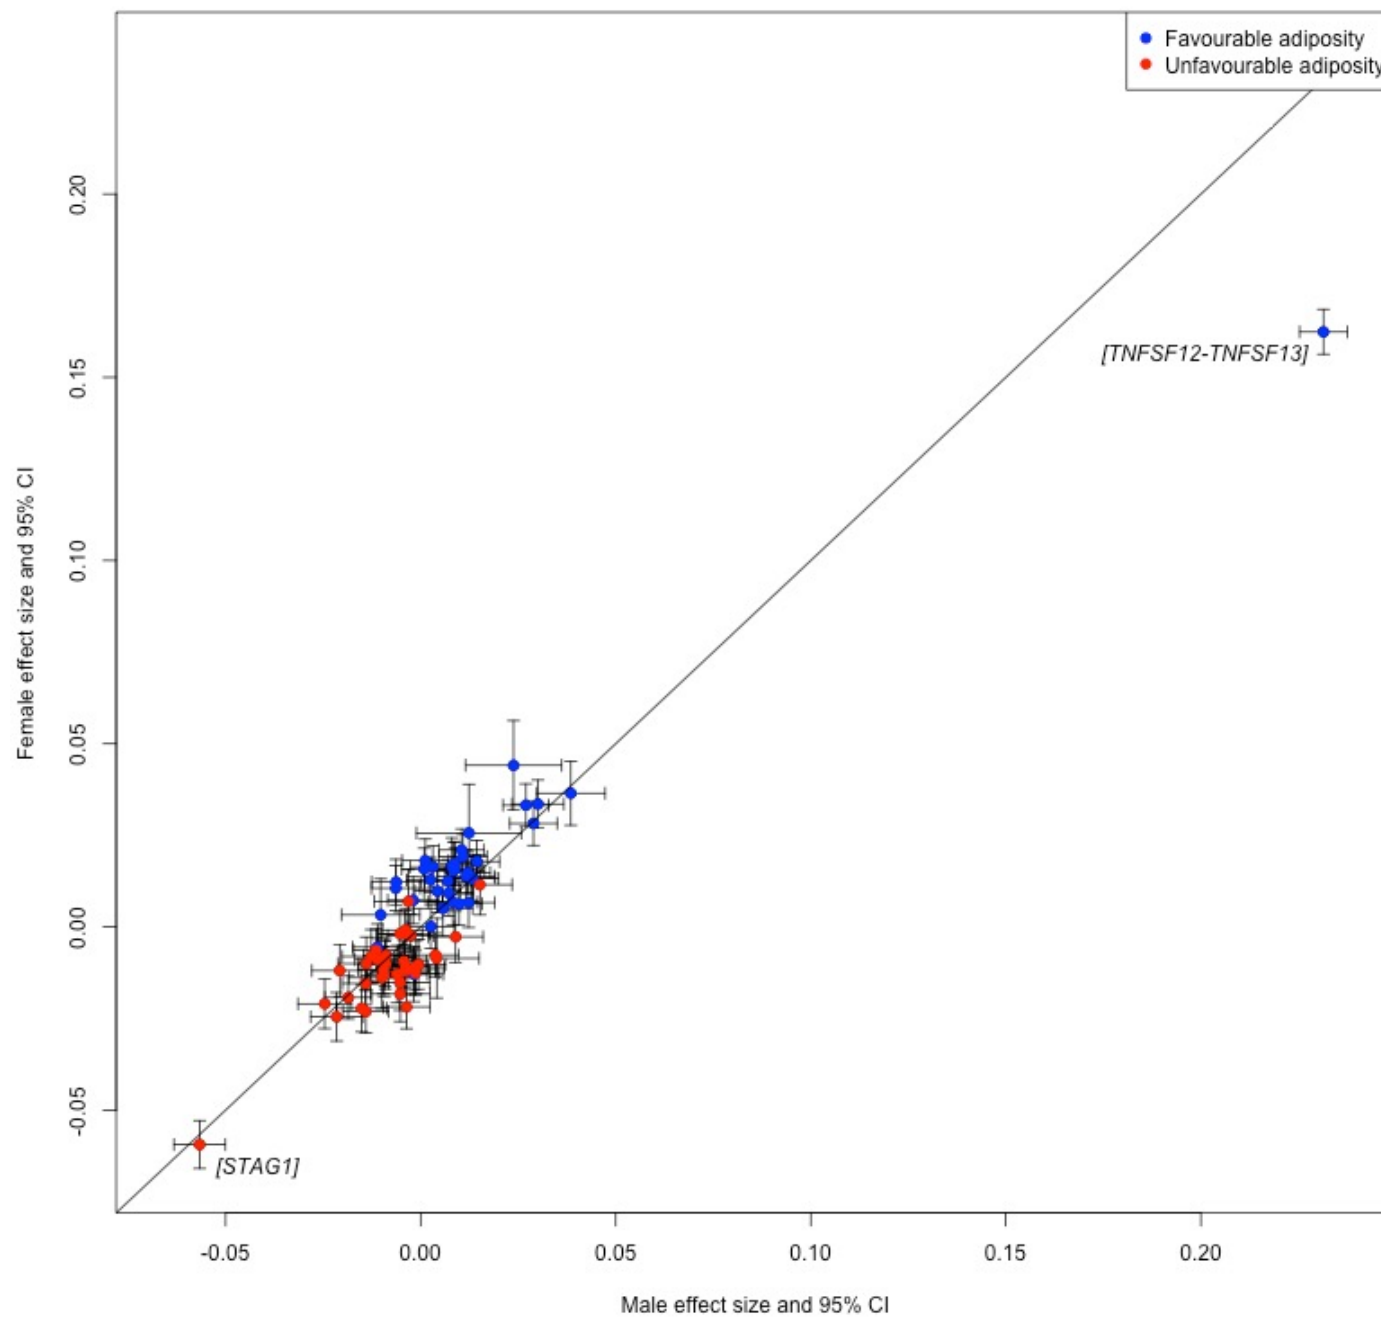

SF 3e

### Triglycerides

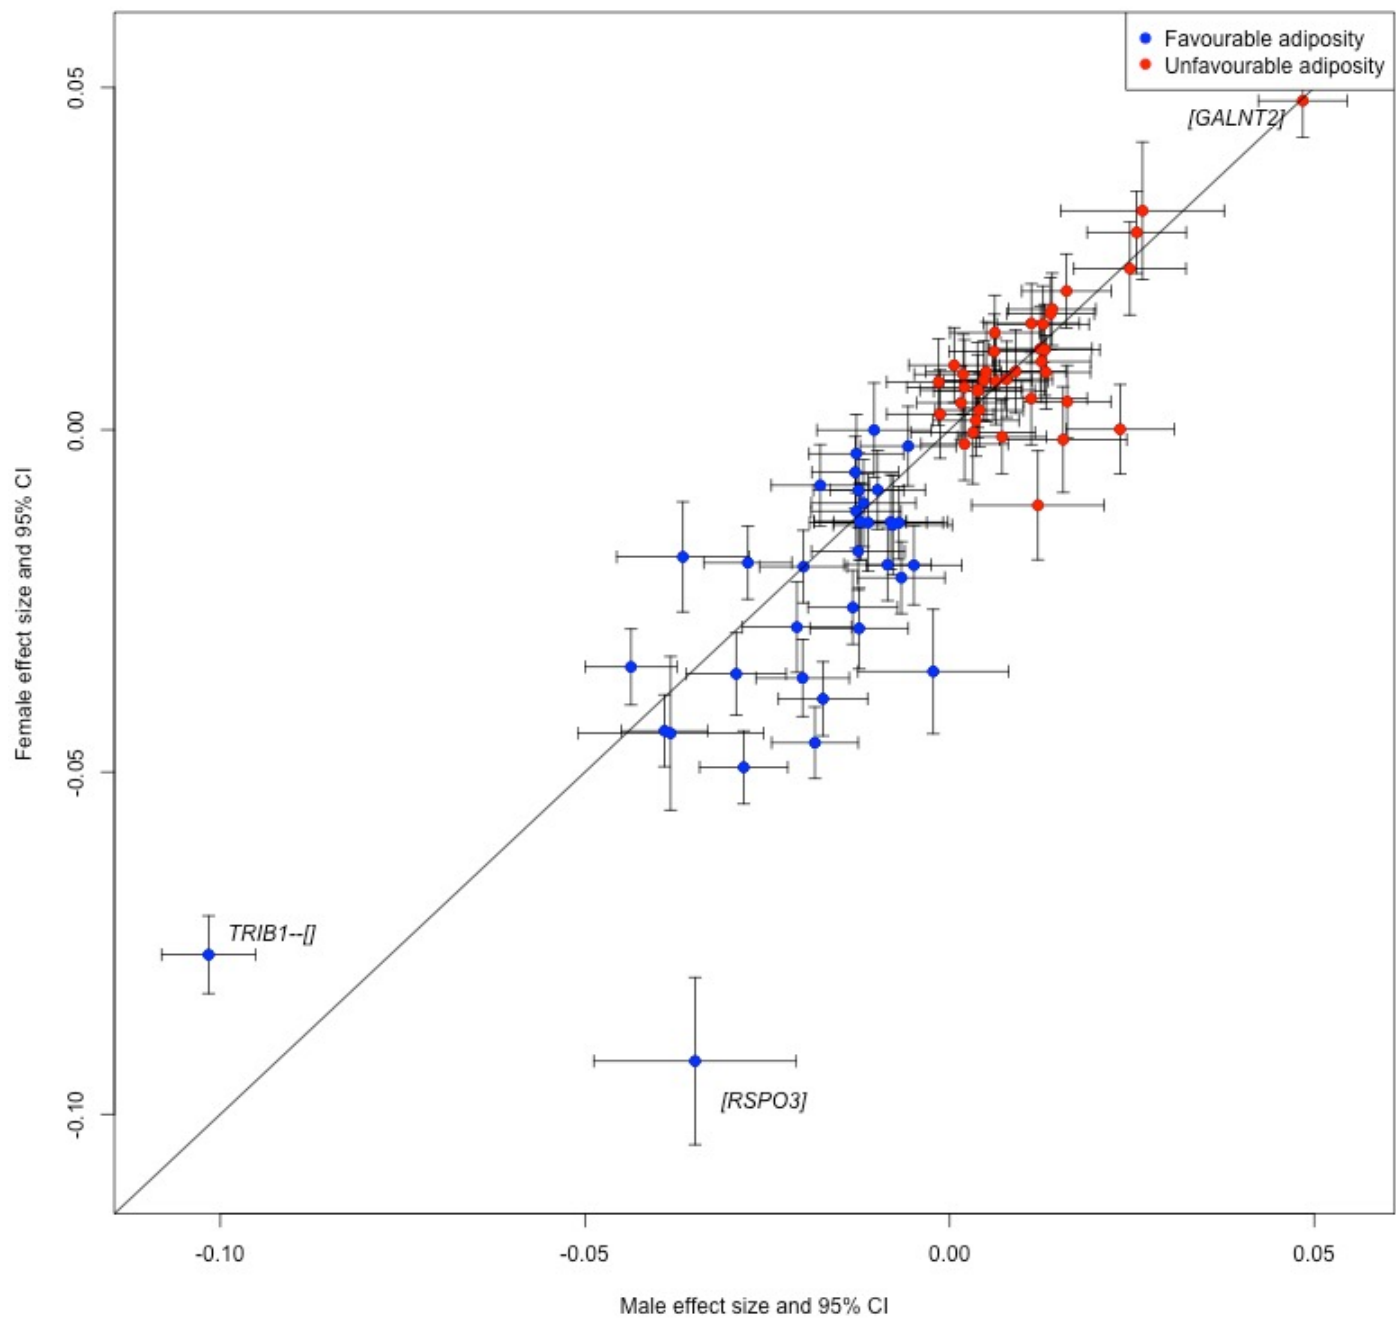



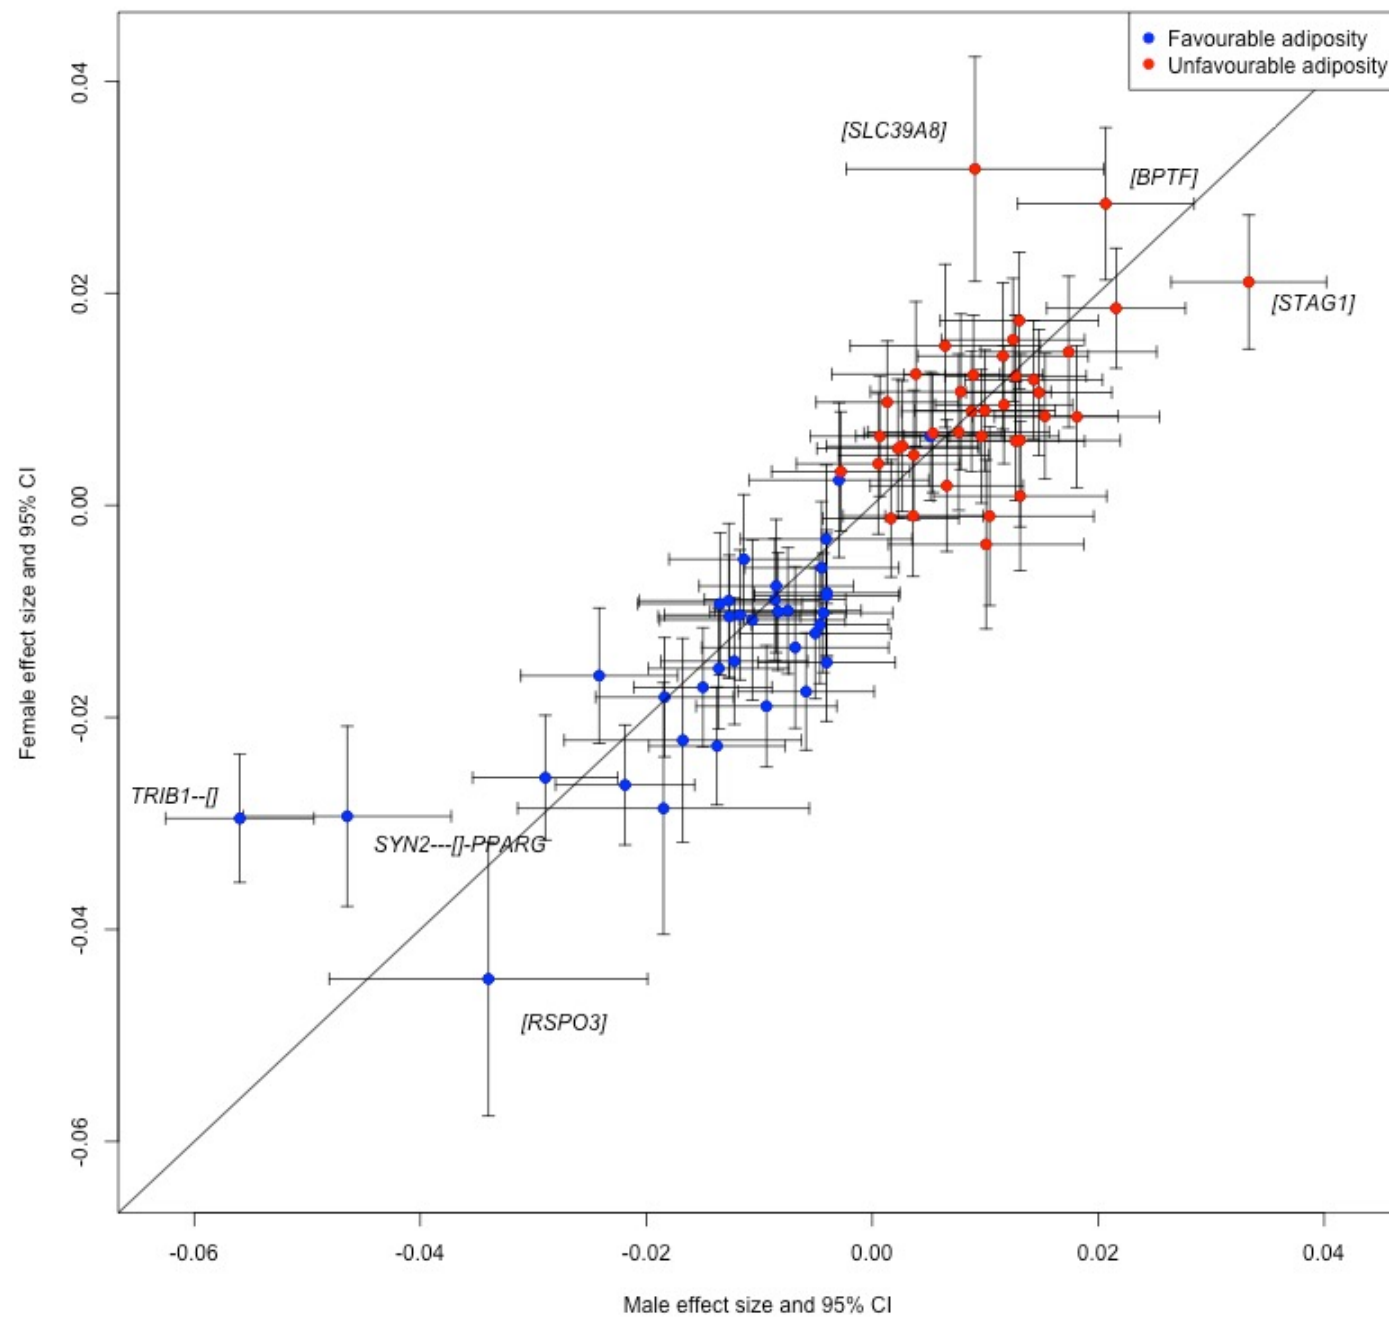

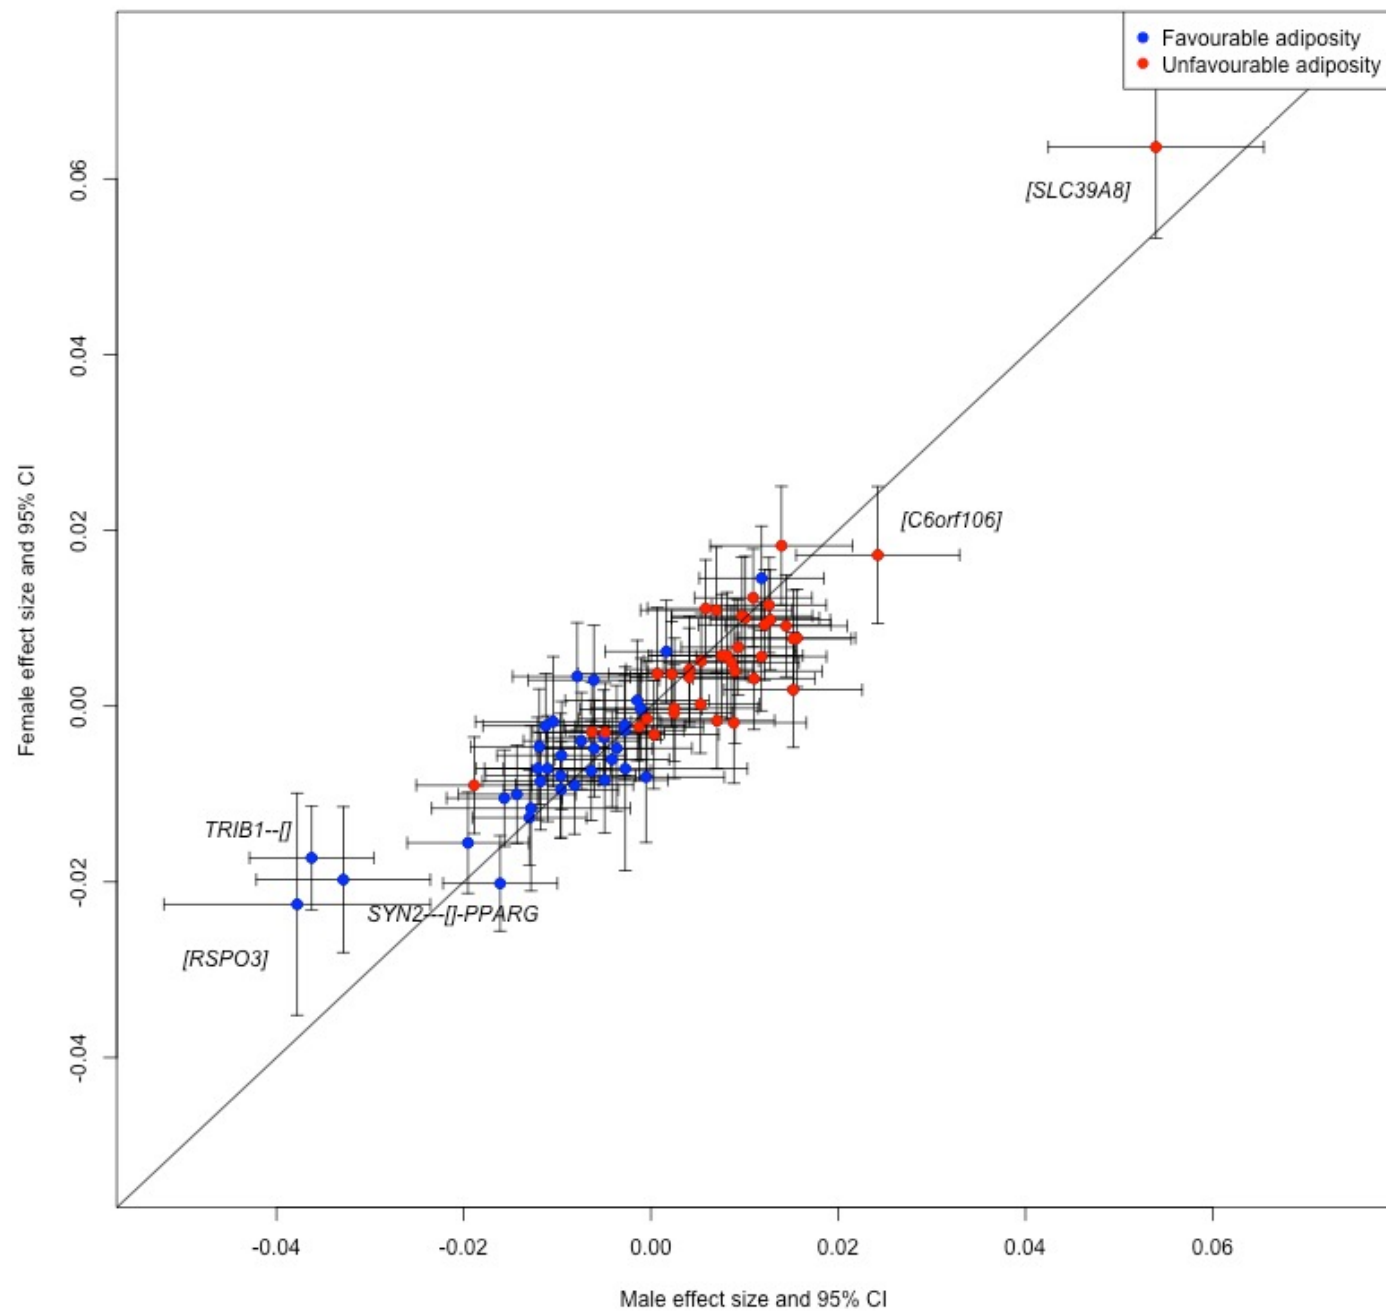

SF 3h

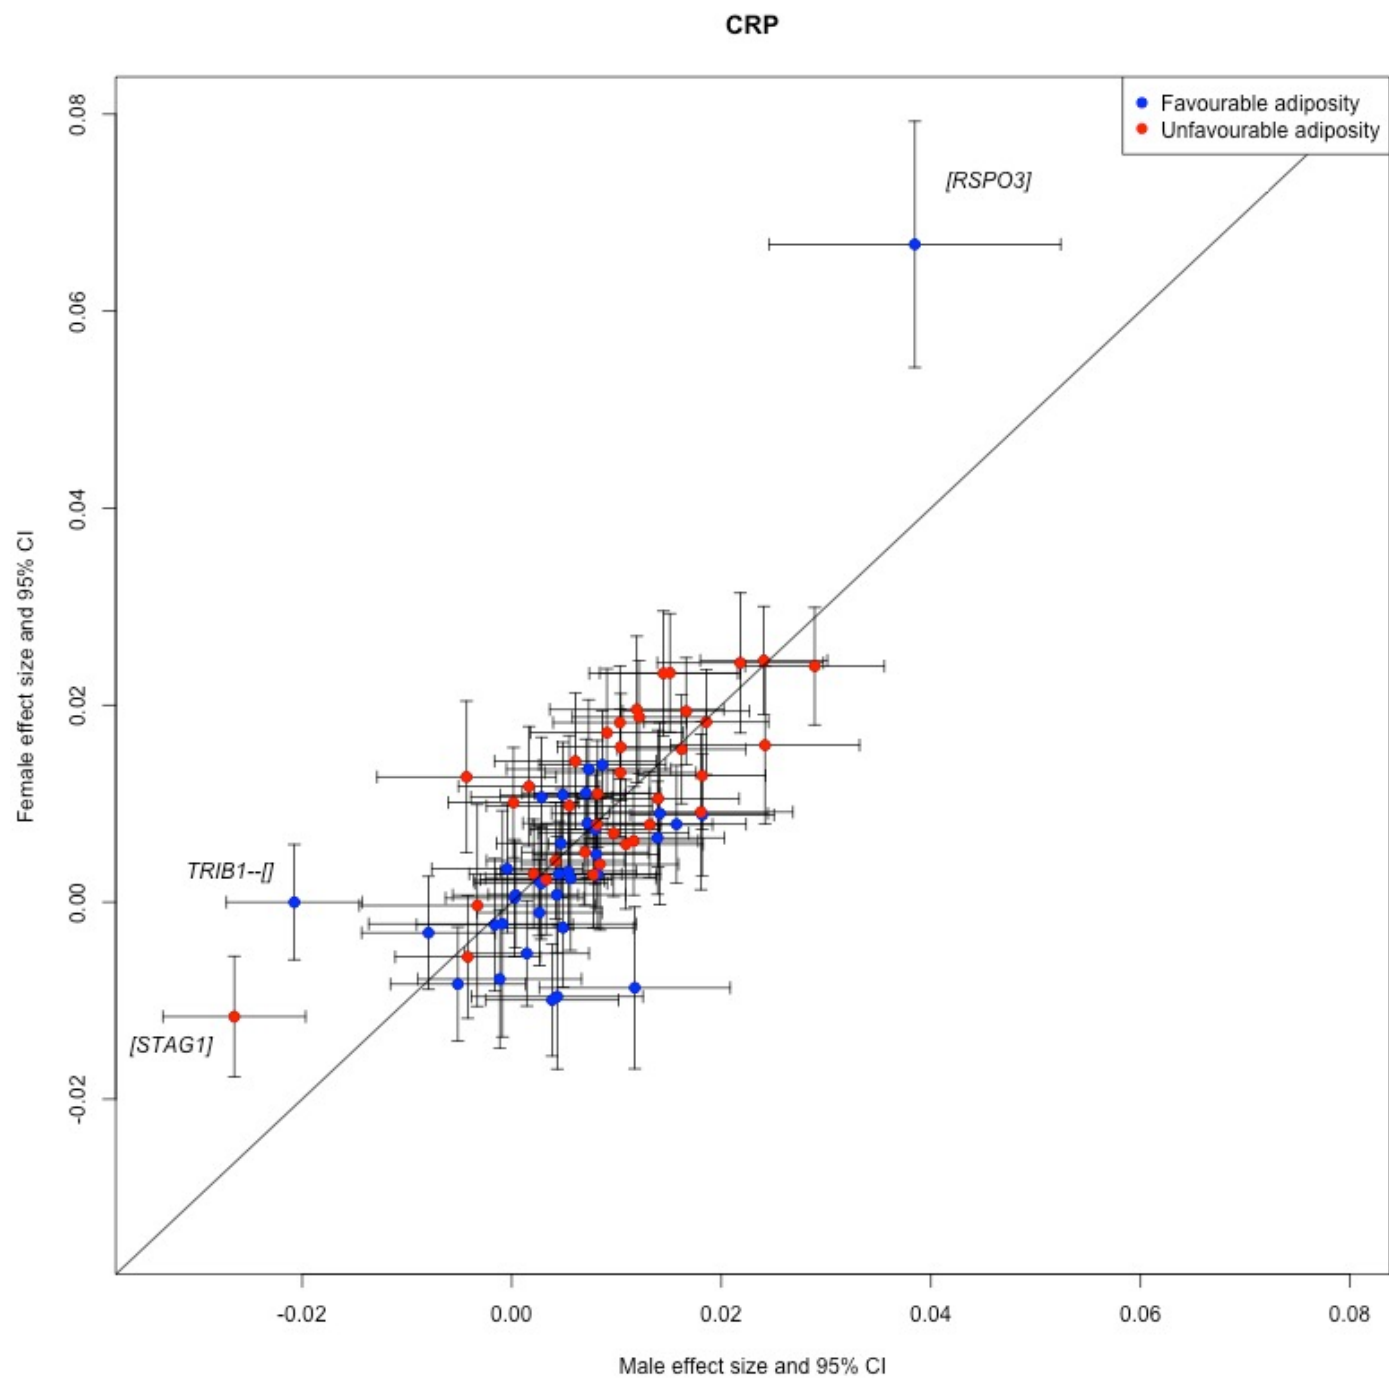

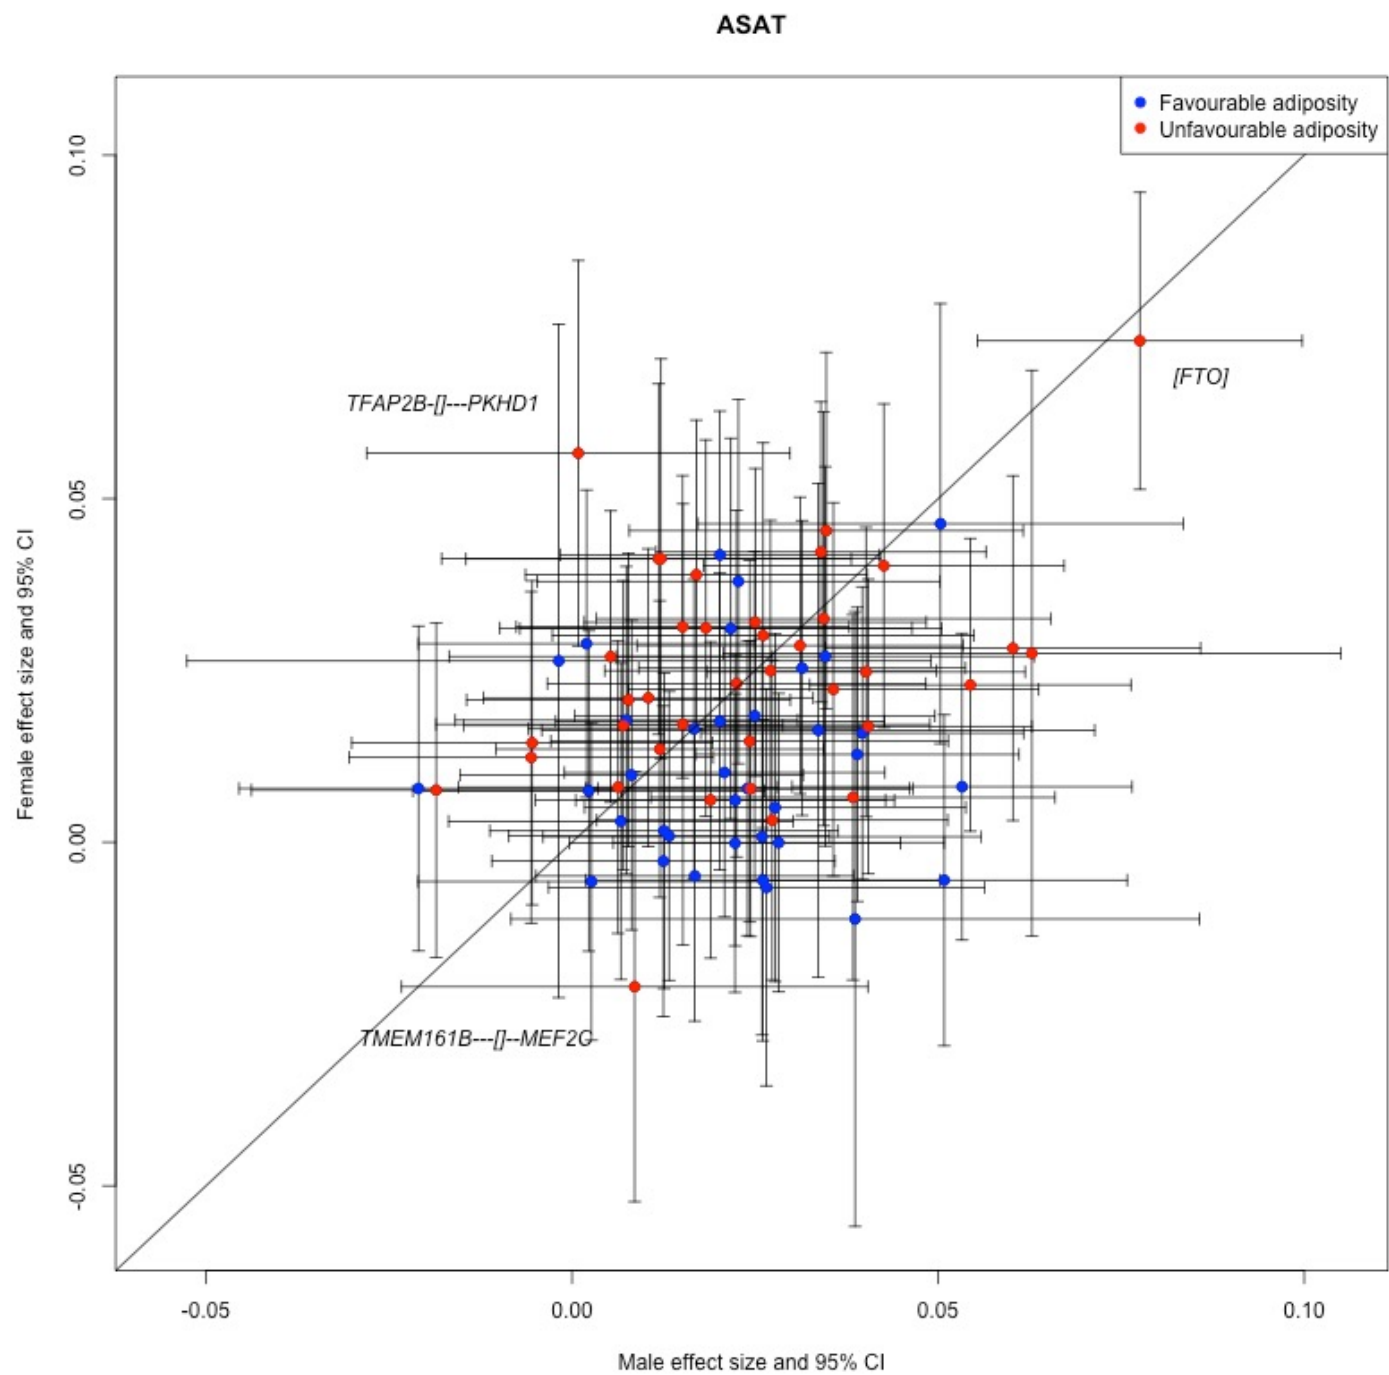

SF 3j

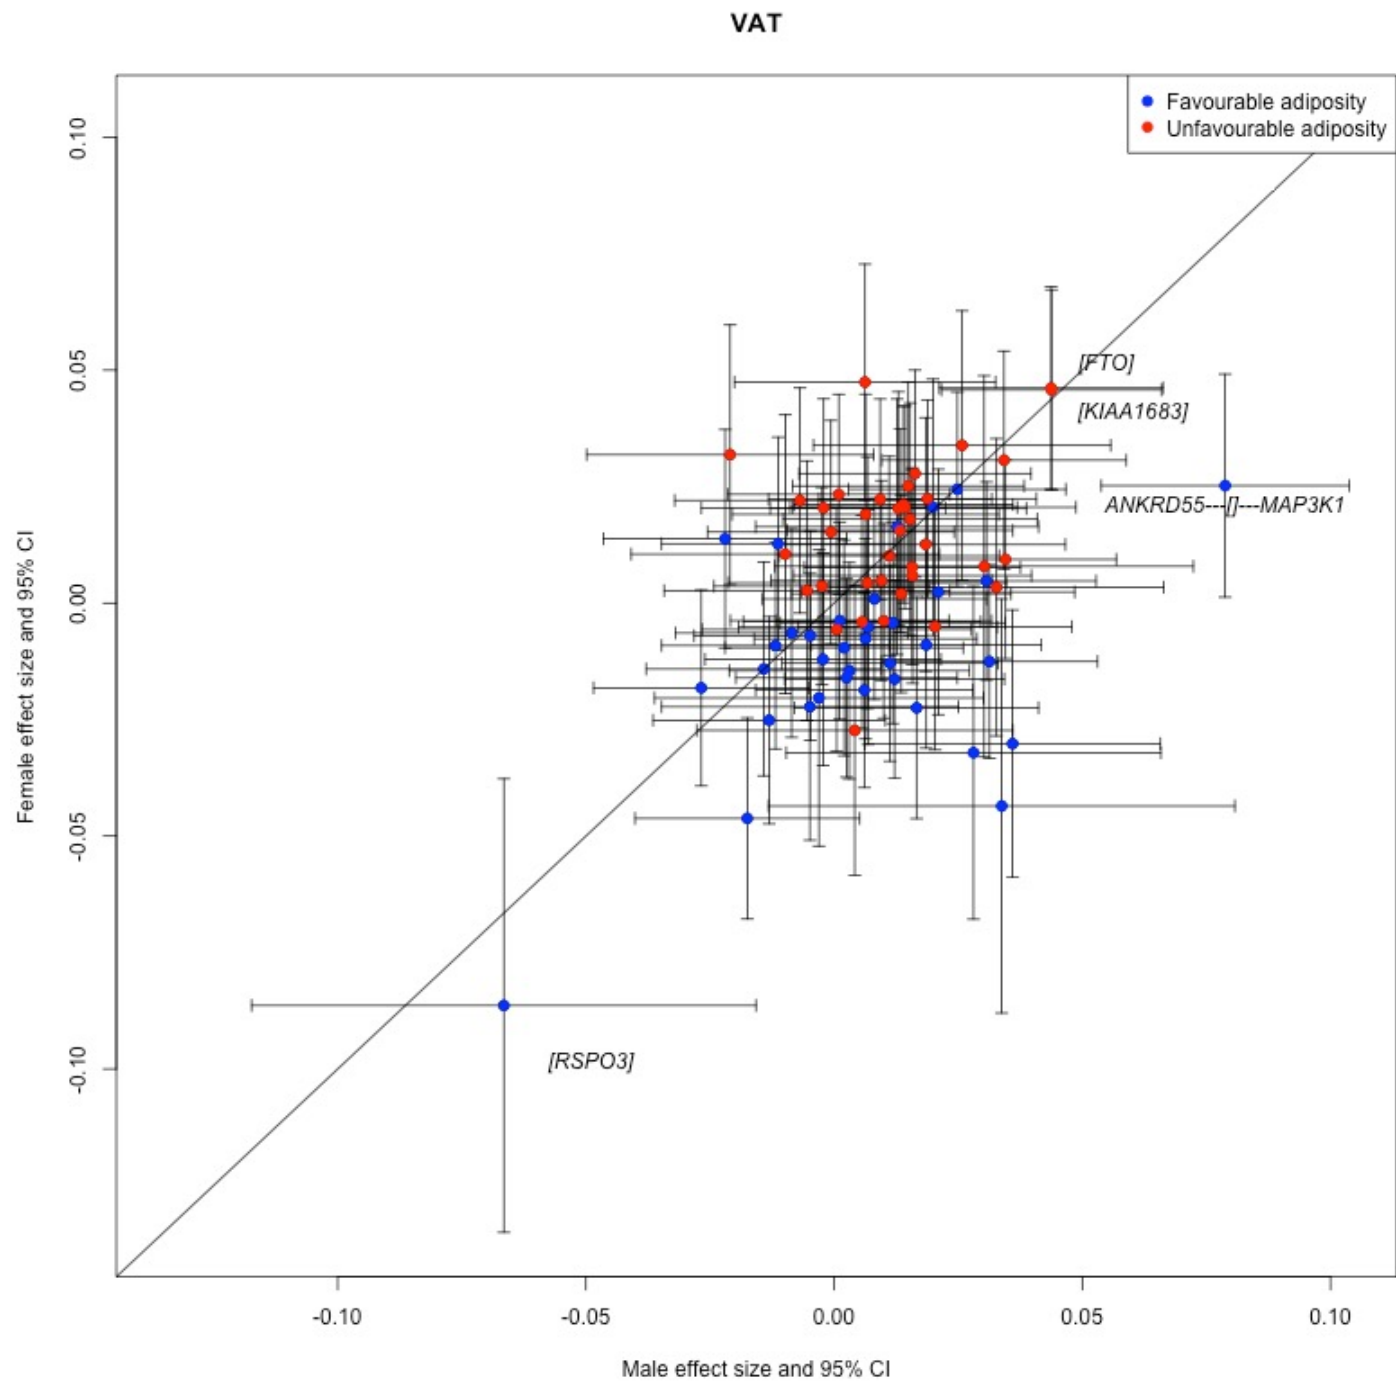

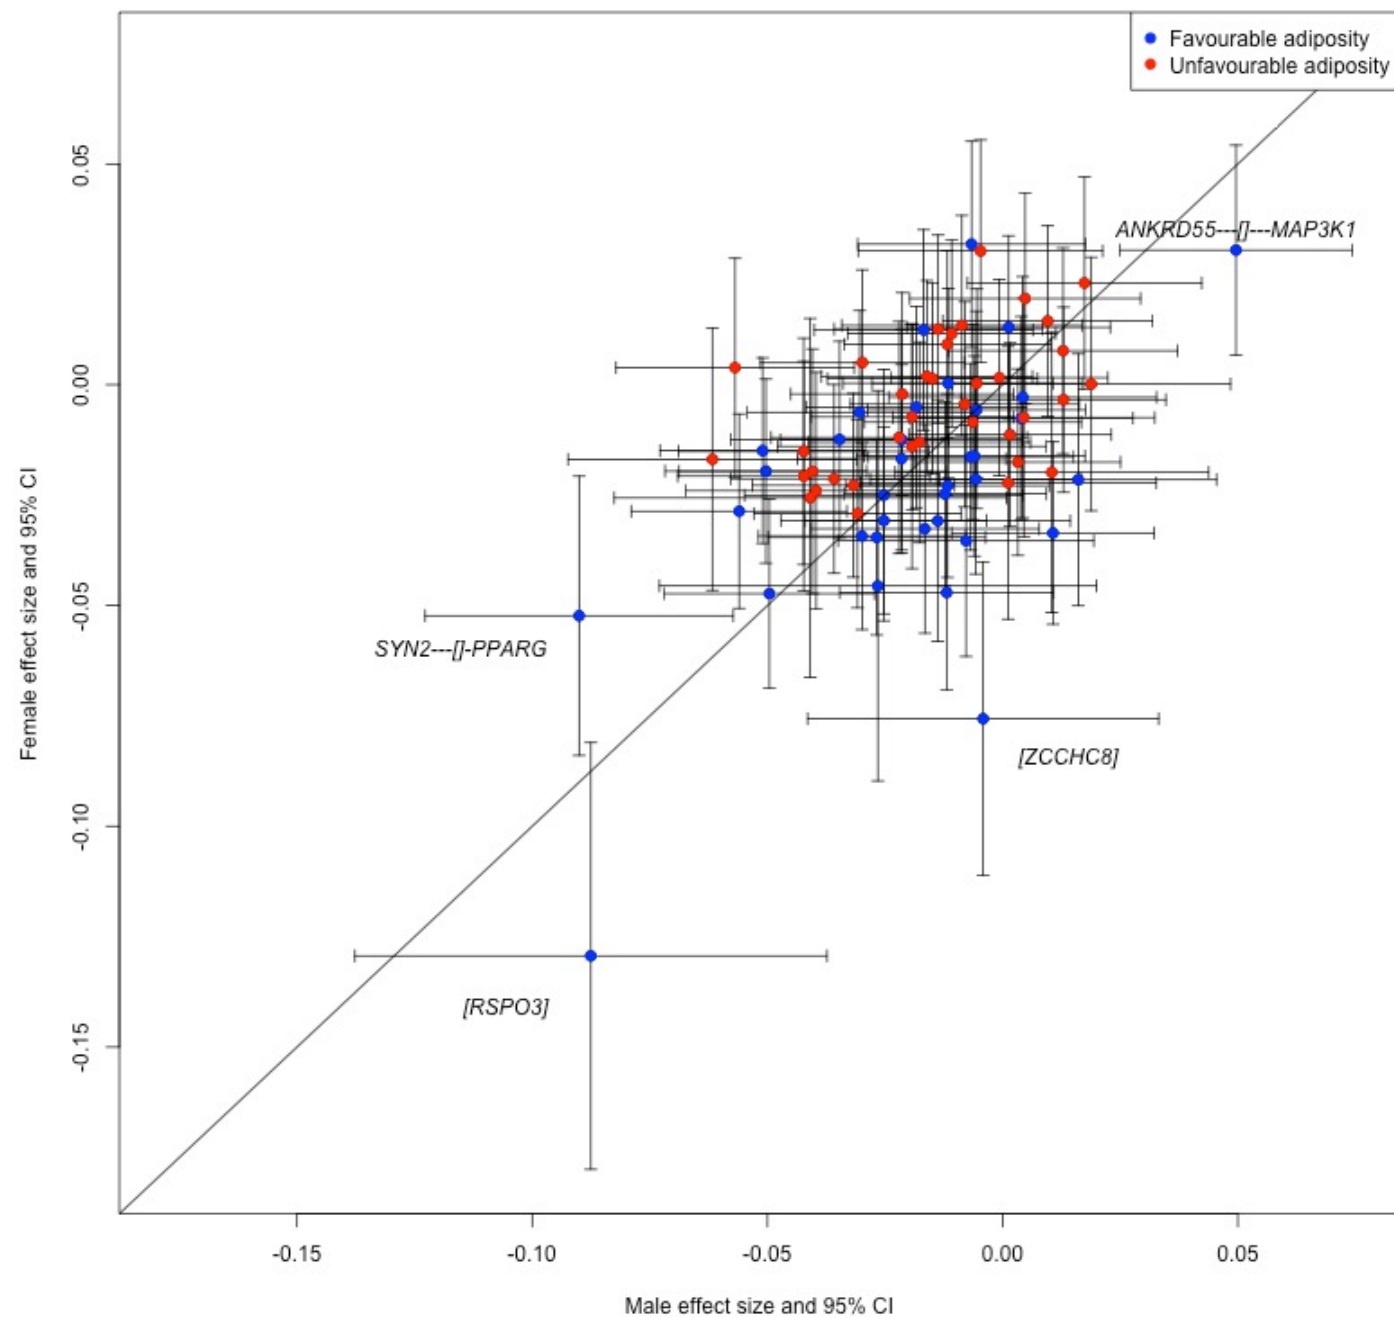

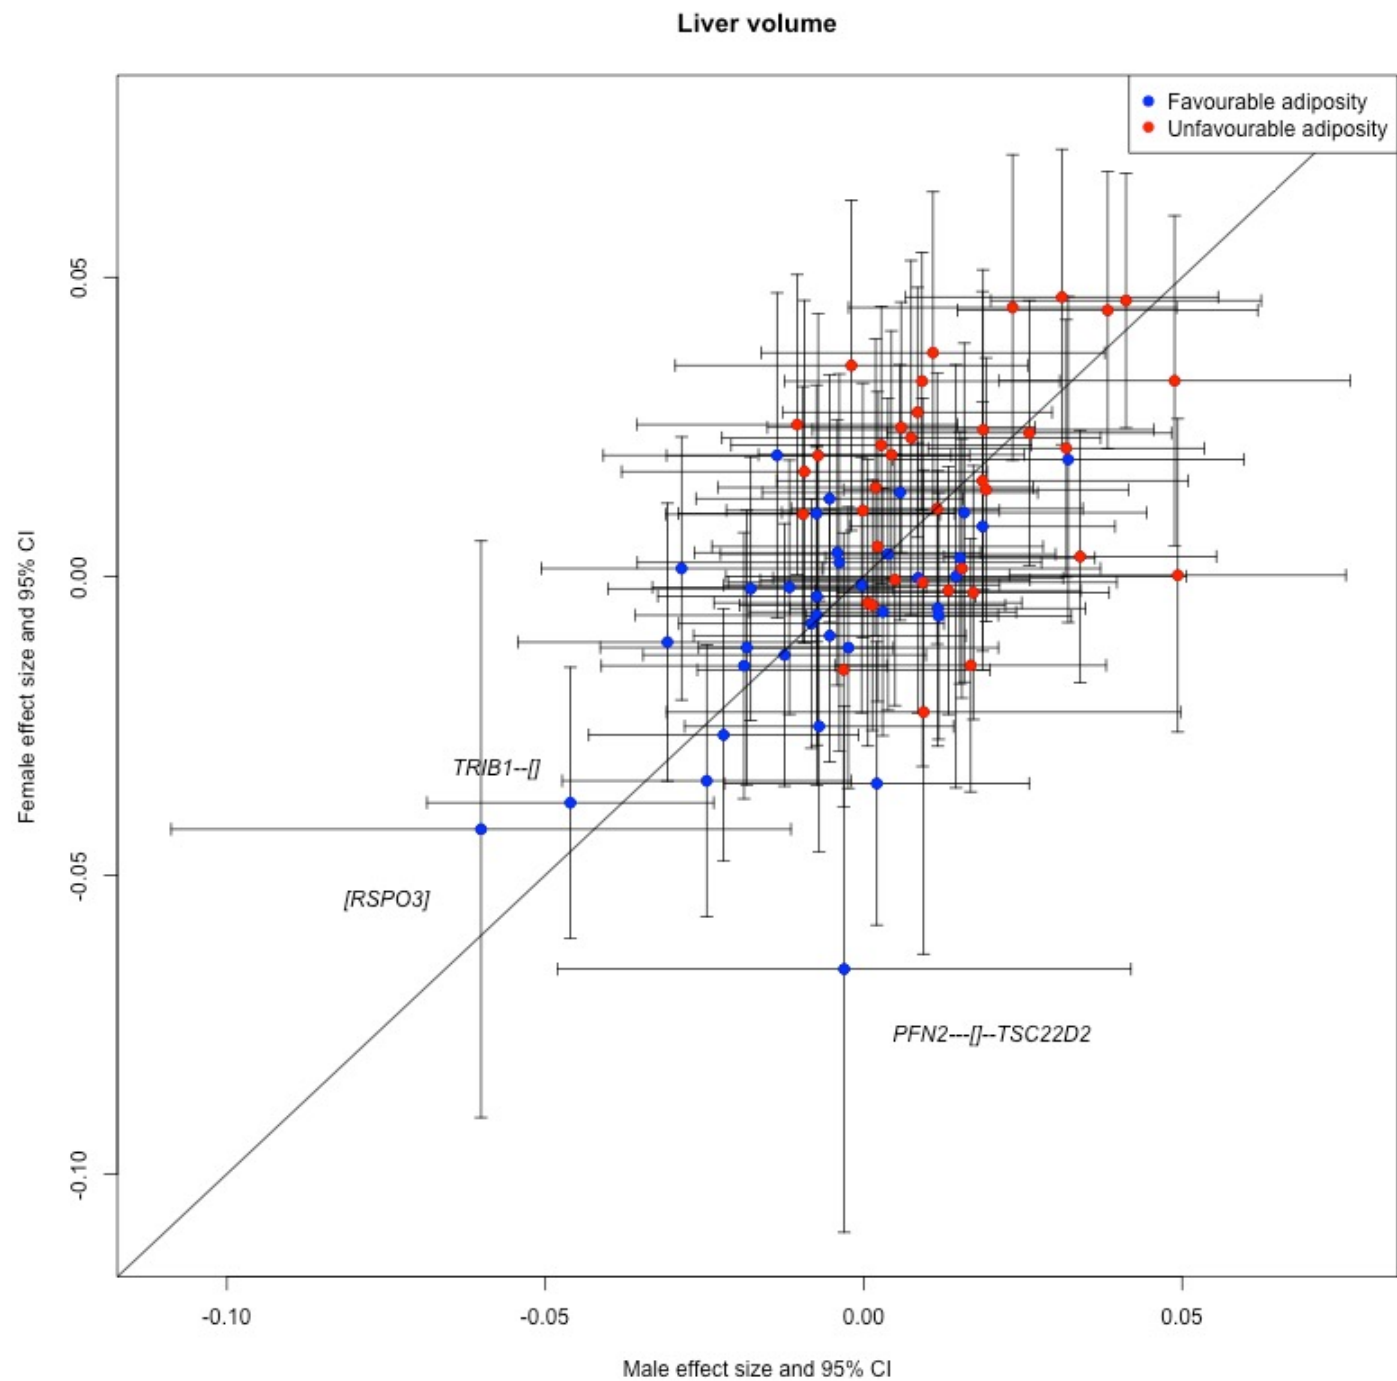

SF 3m

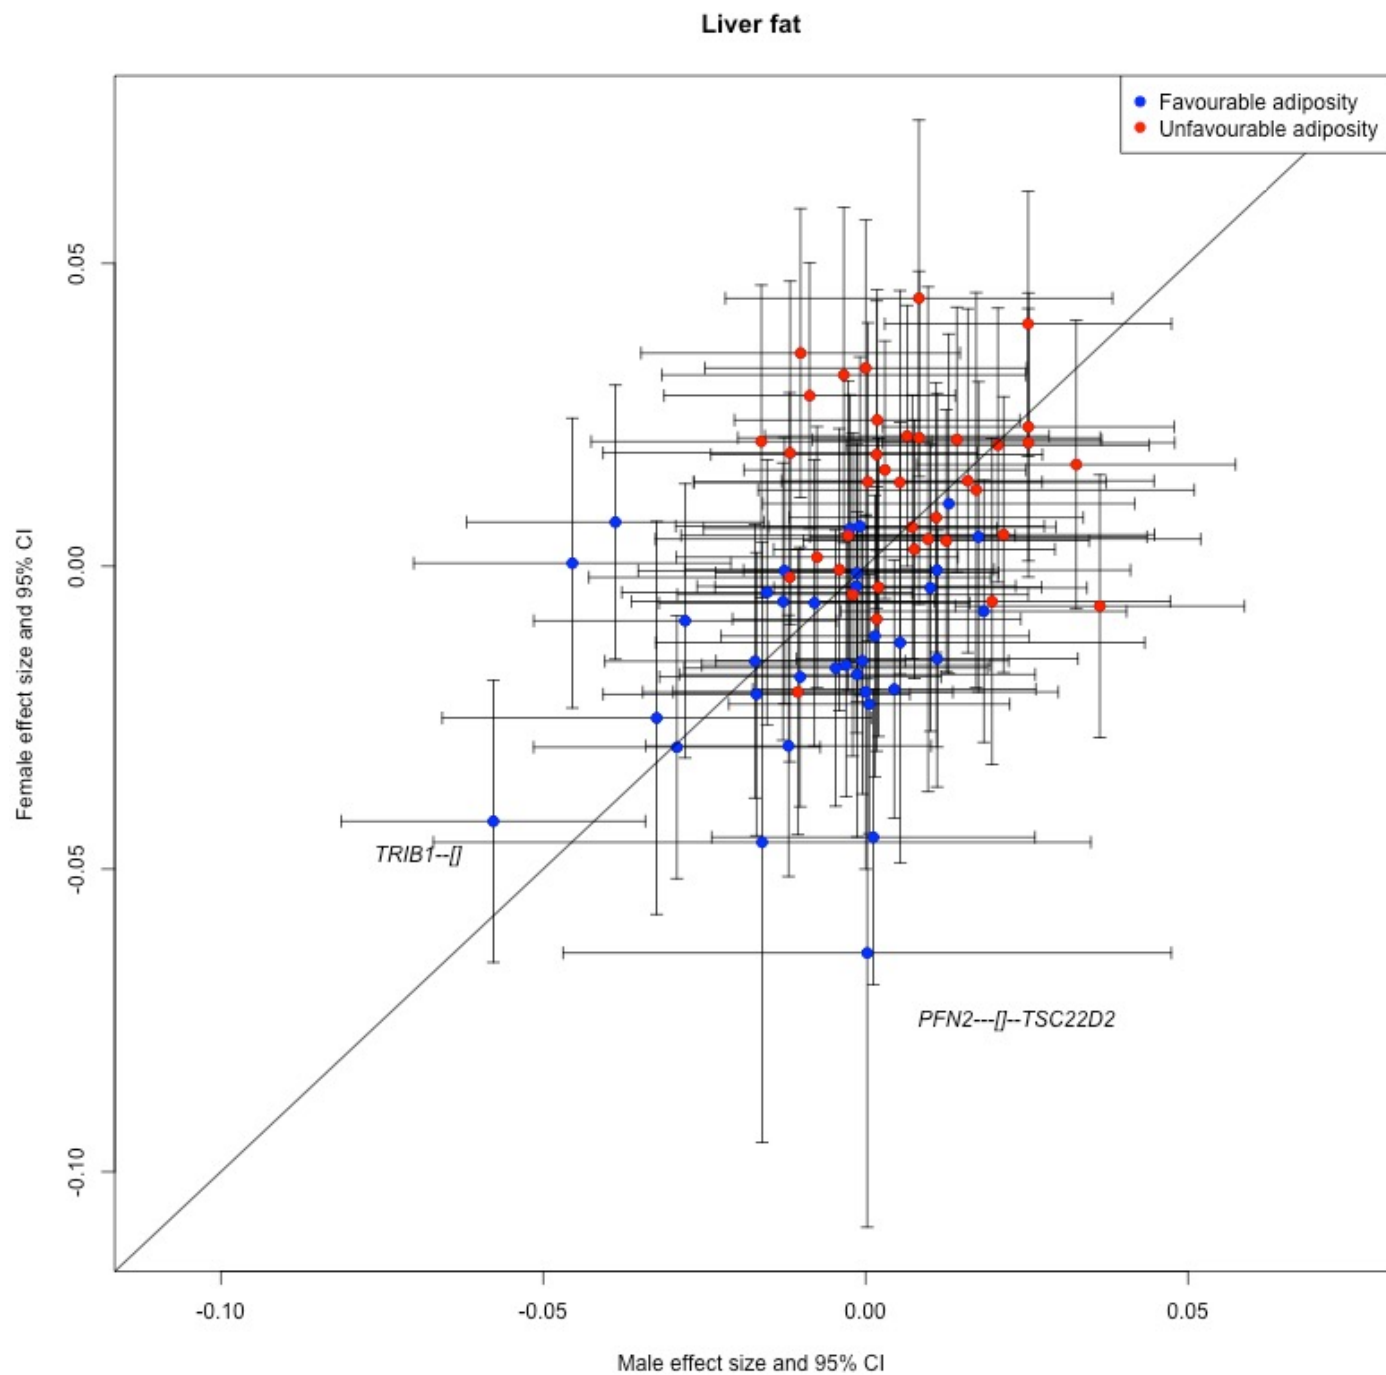



SF 3n

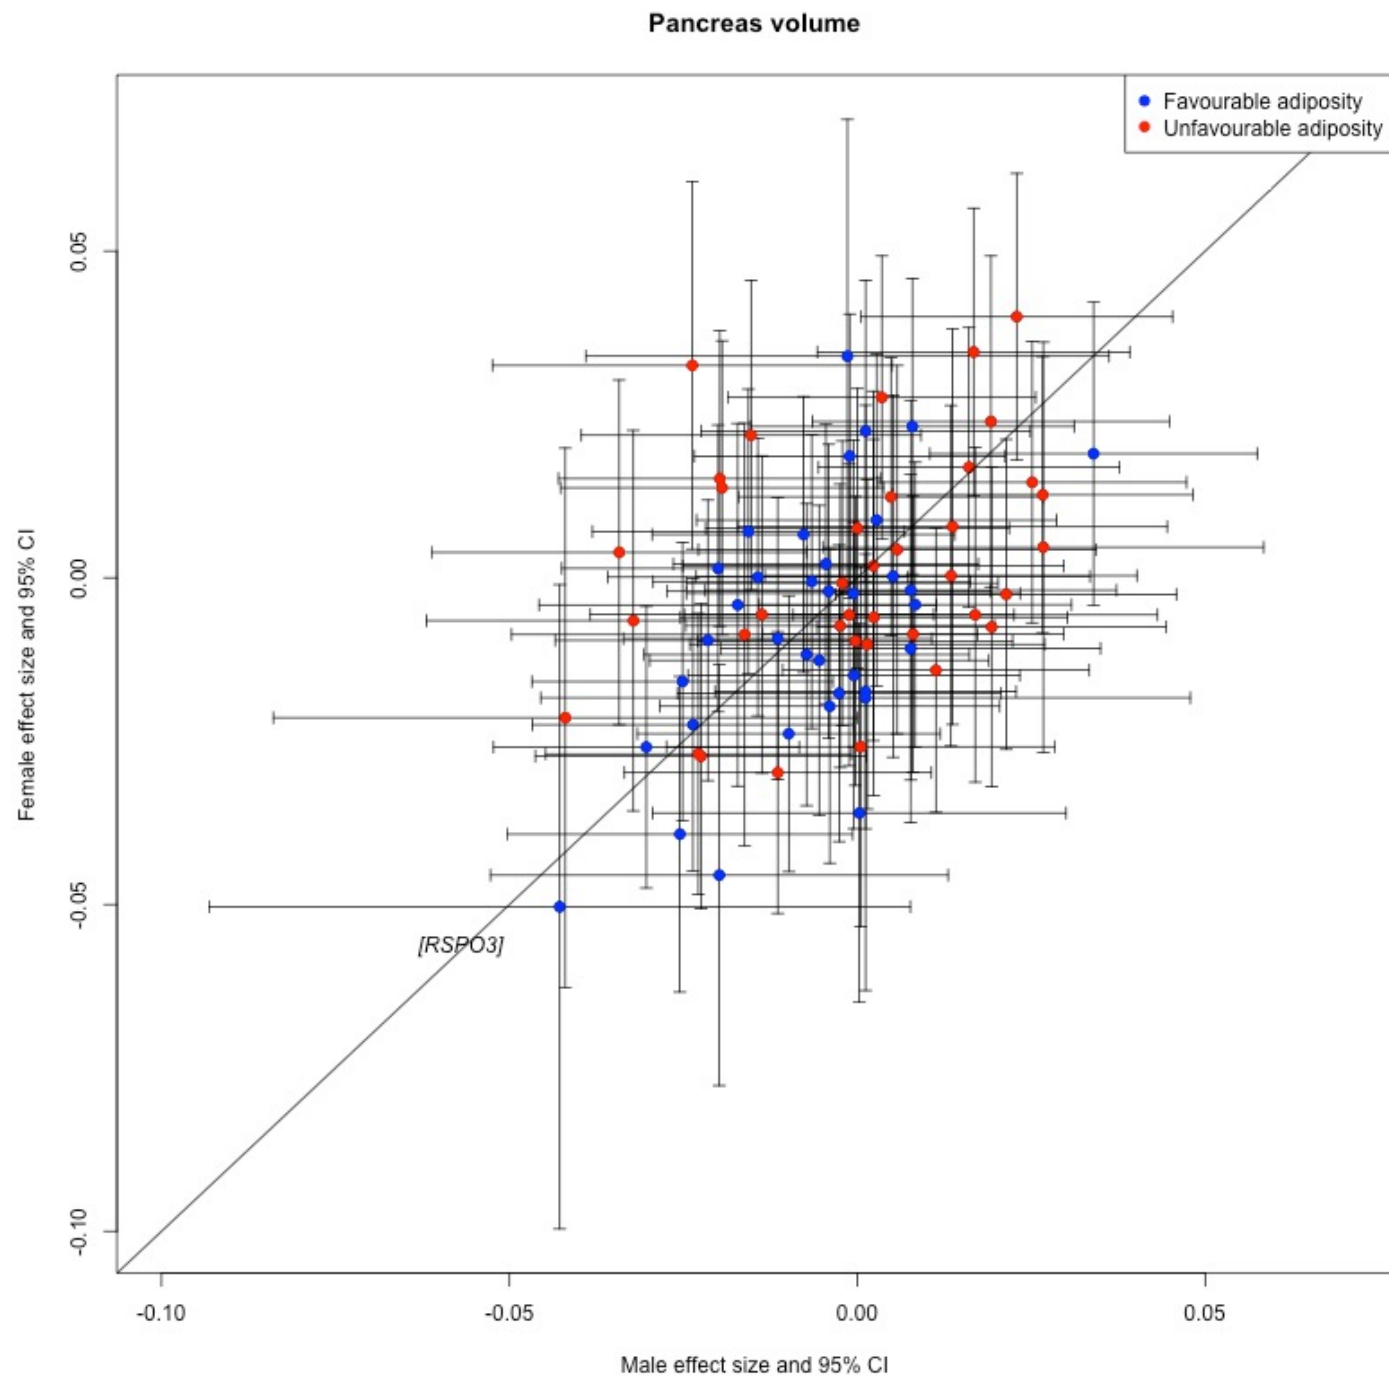

## Pancreas fat

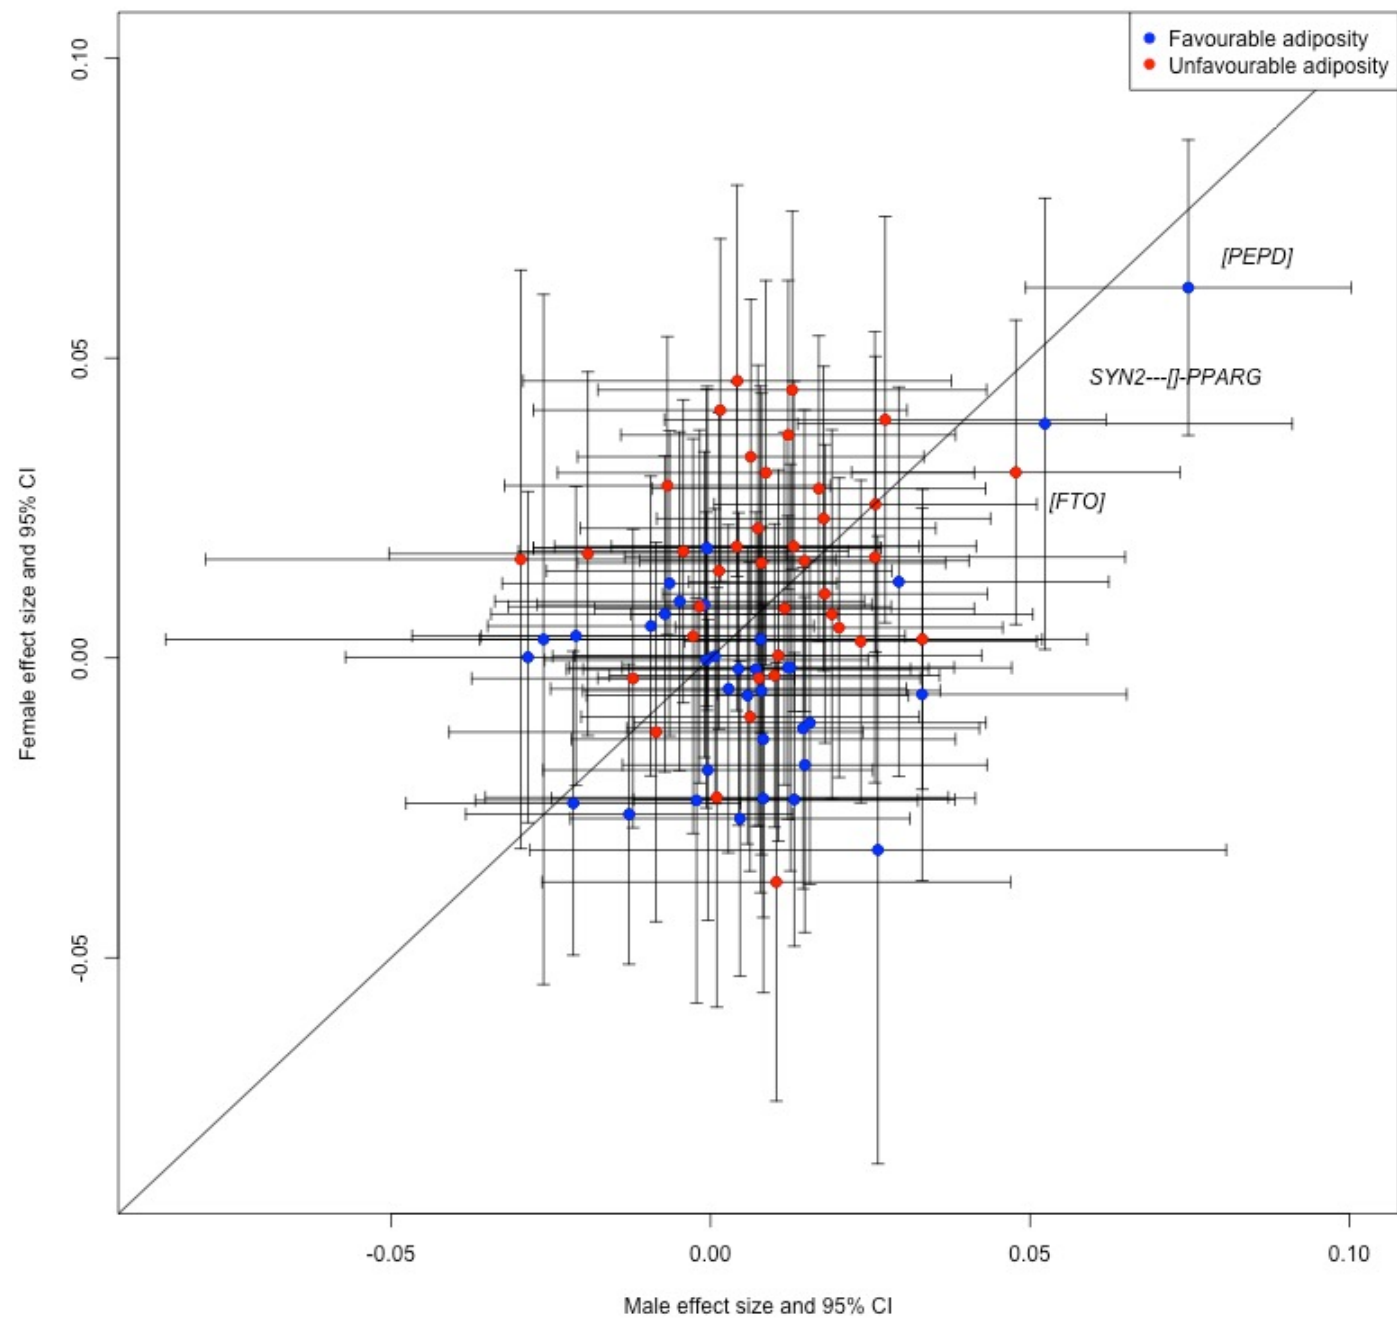

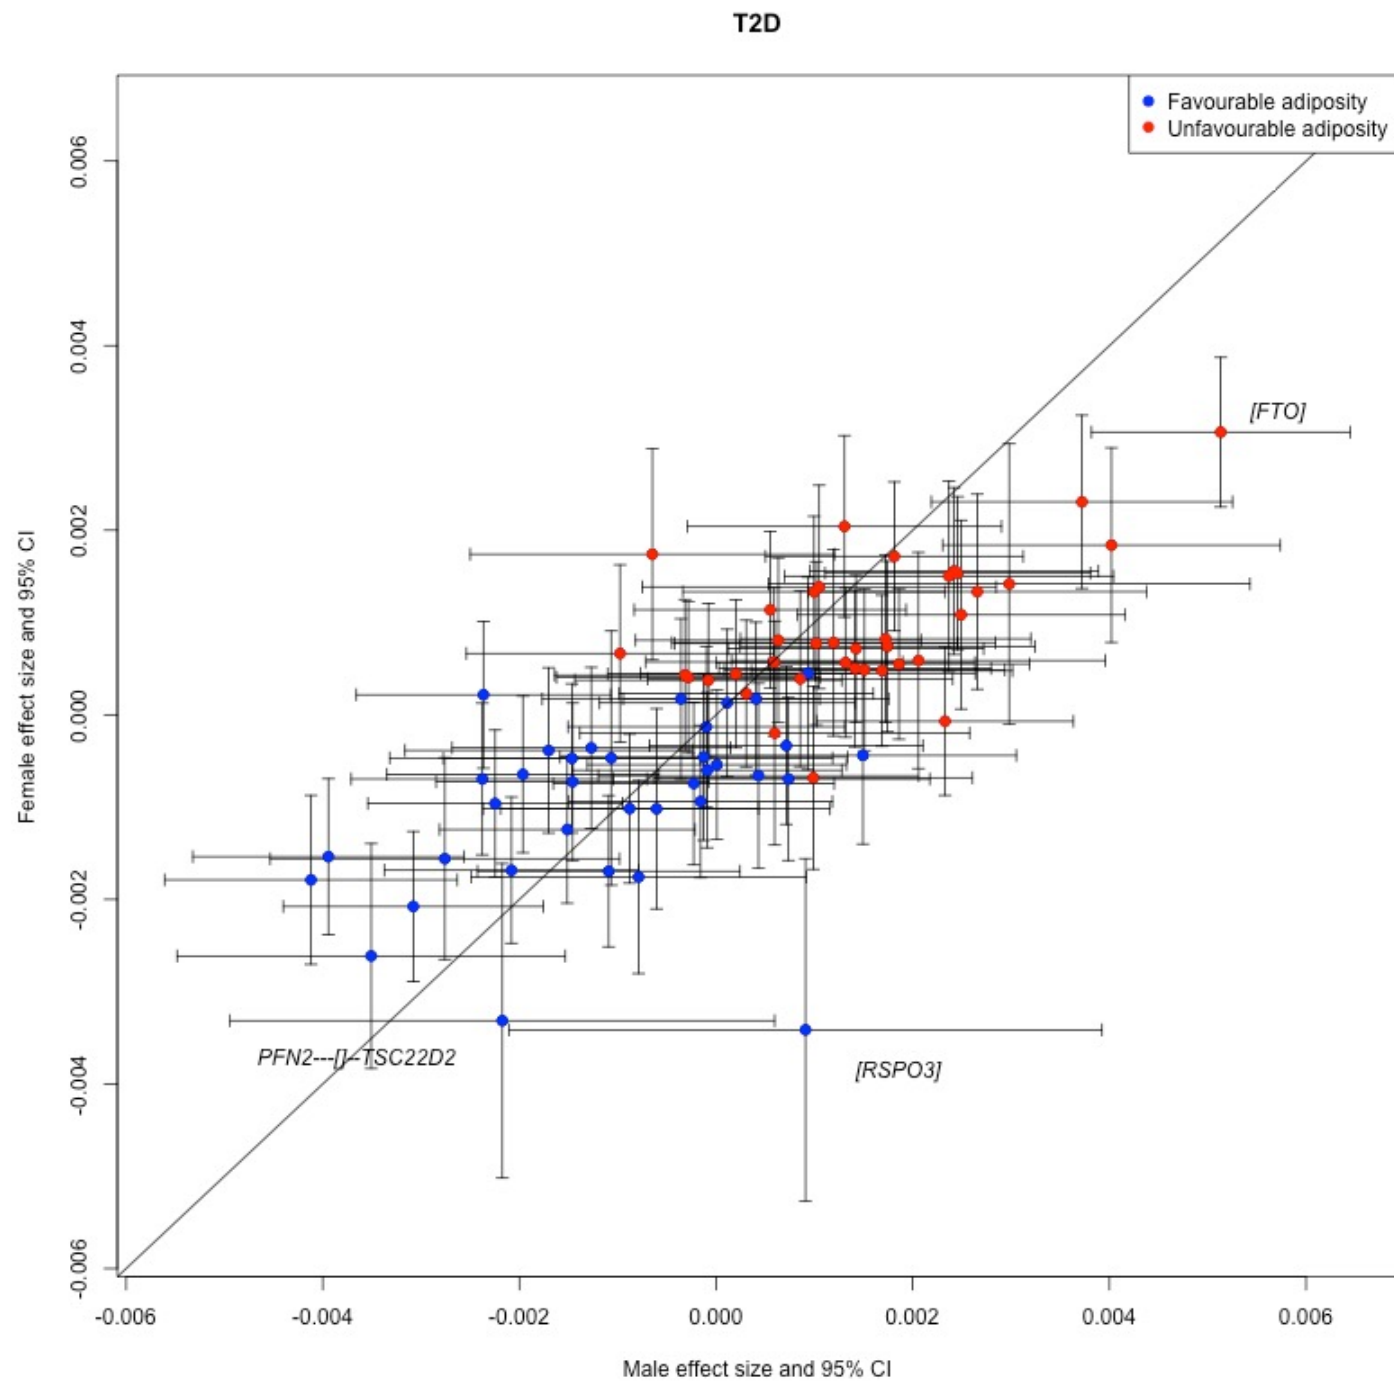

SF 3q

### Heart disease

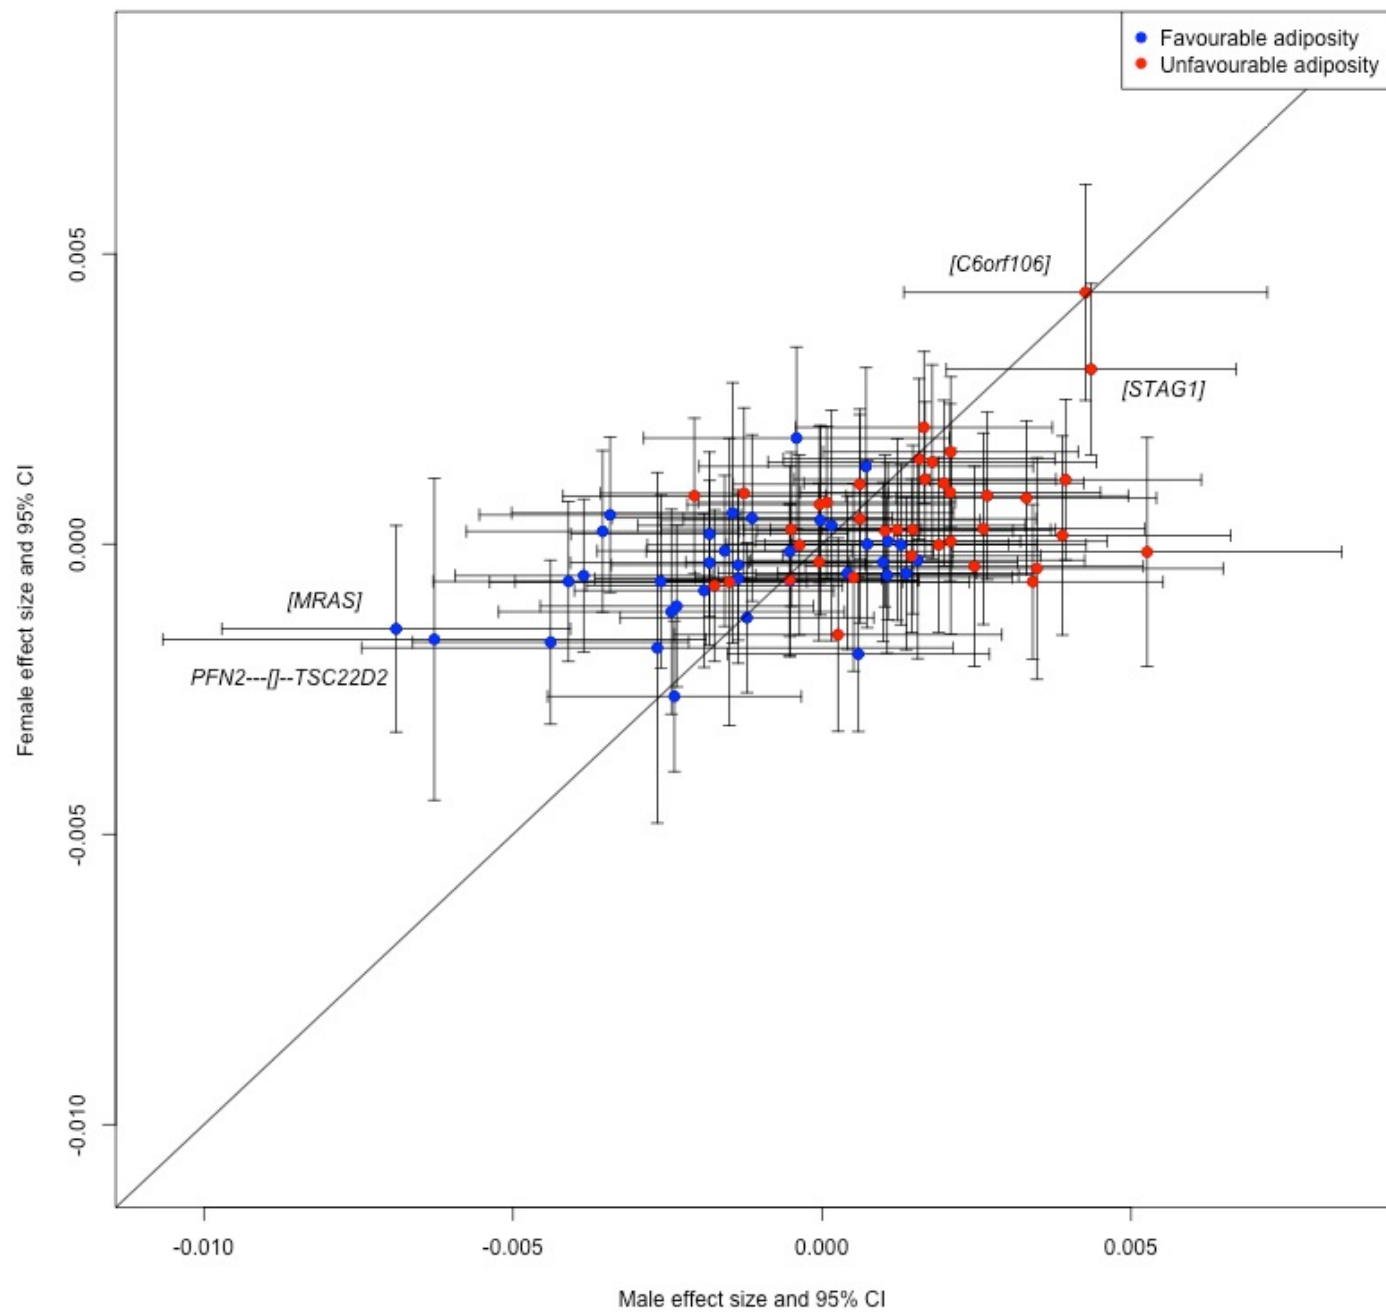

SF 3r

### Hypertension

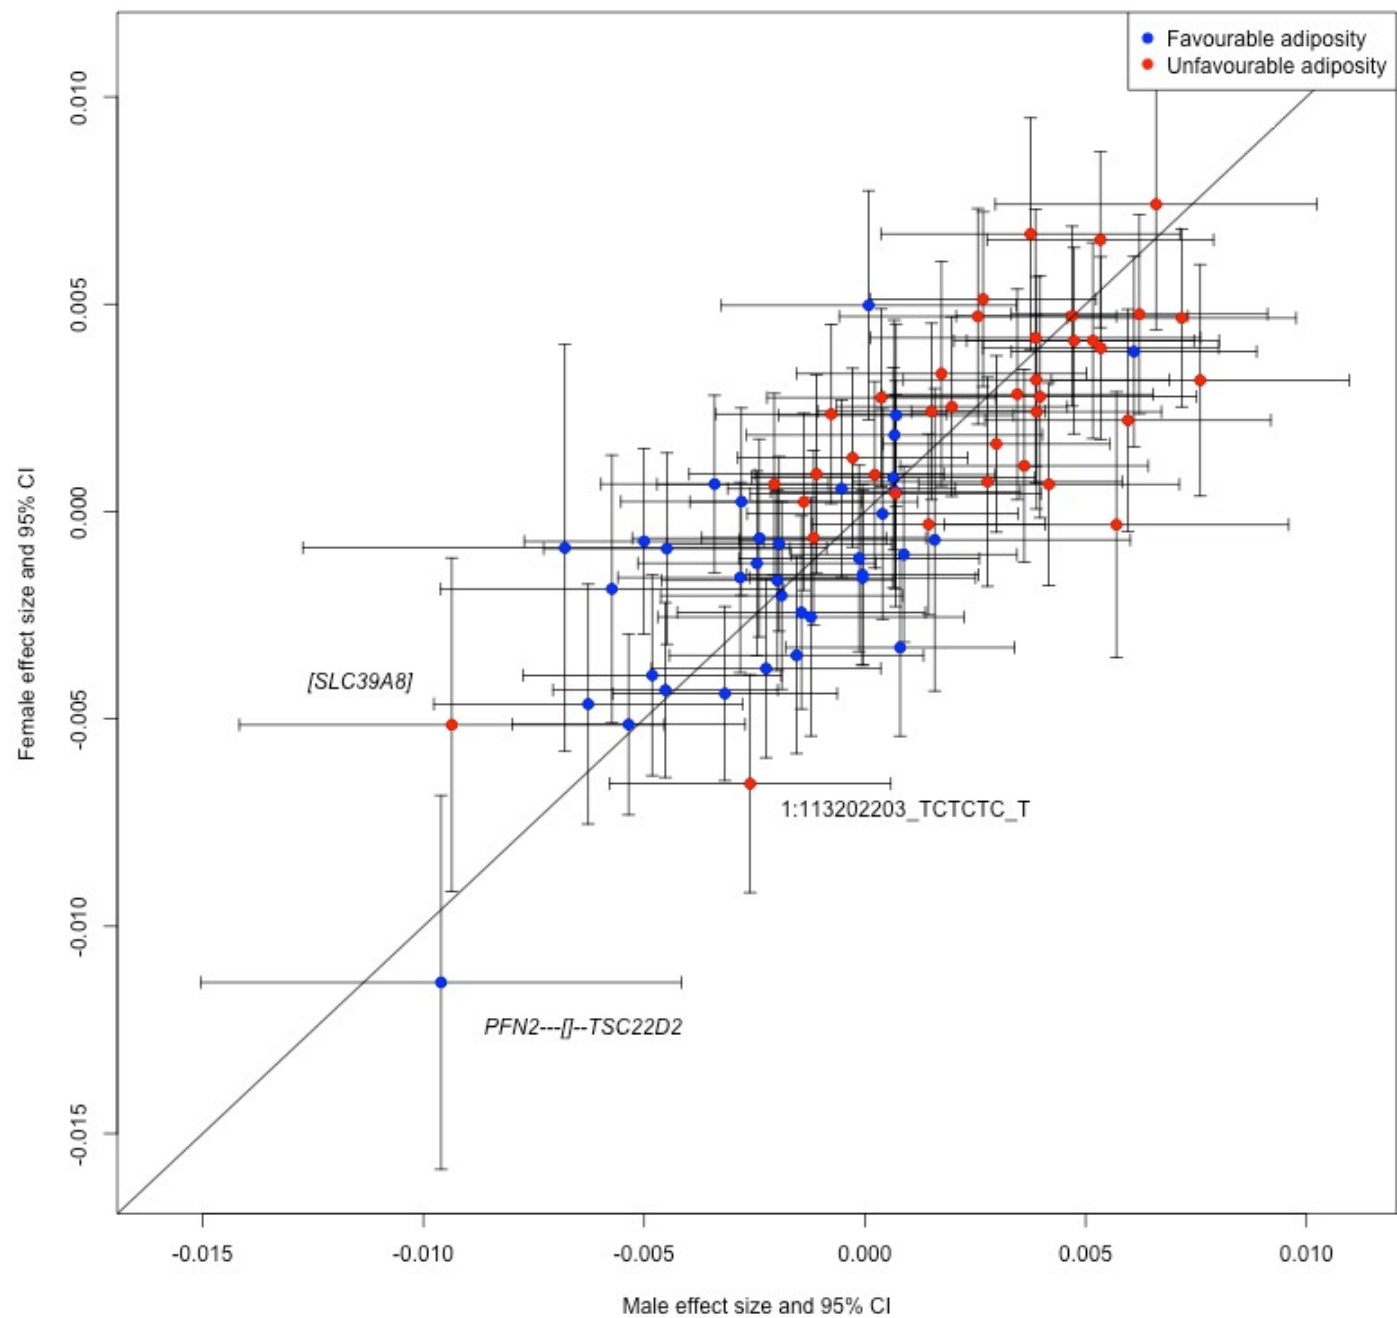

Stroke

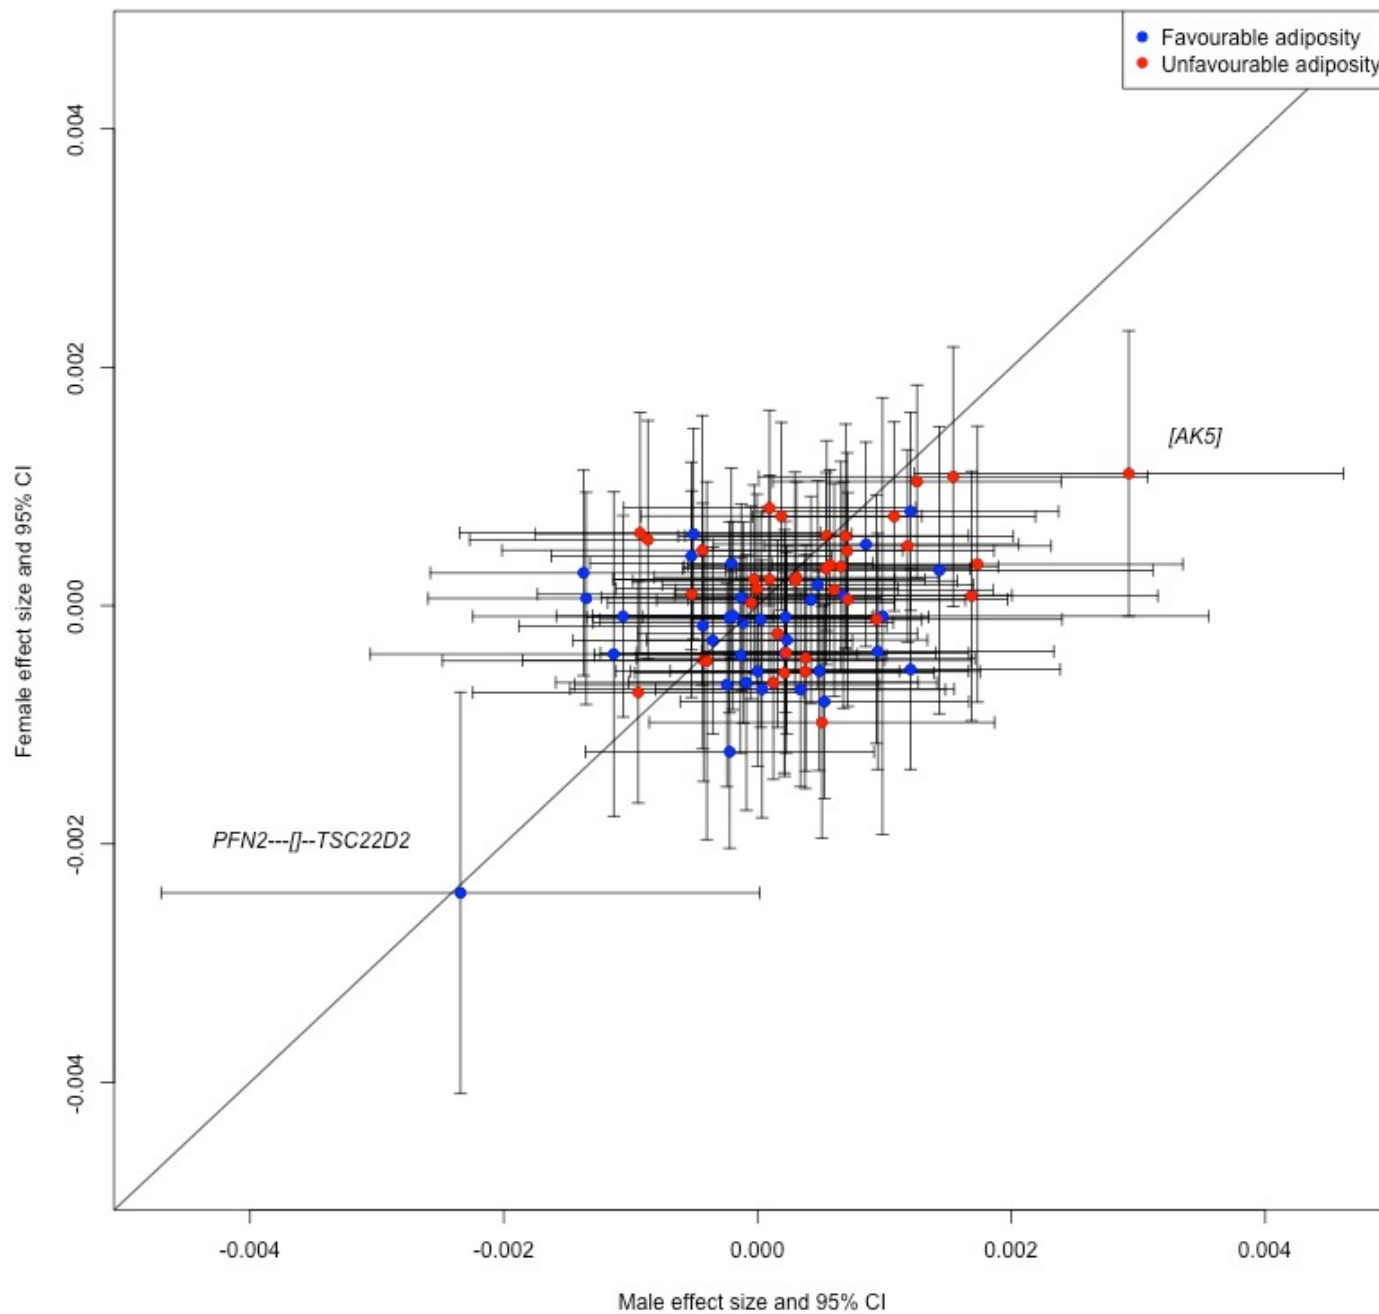

NAFLD

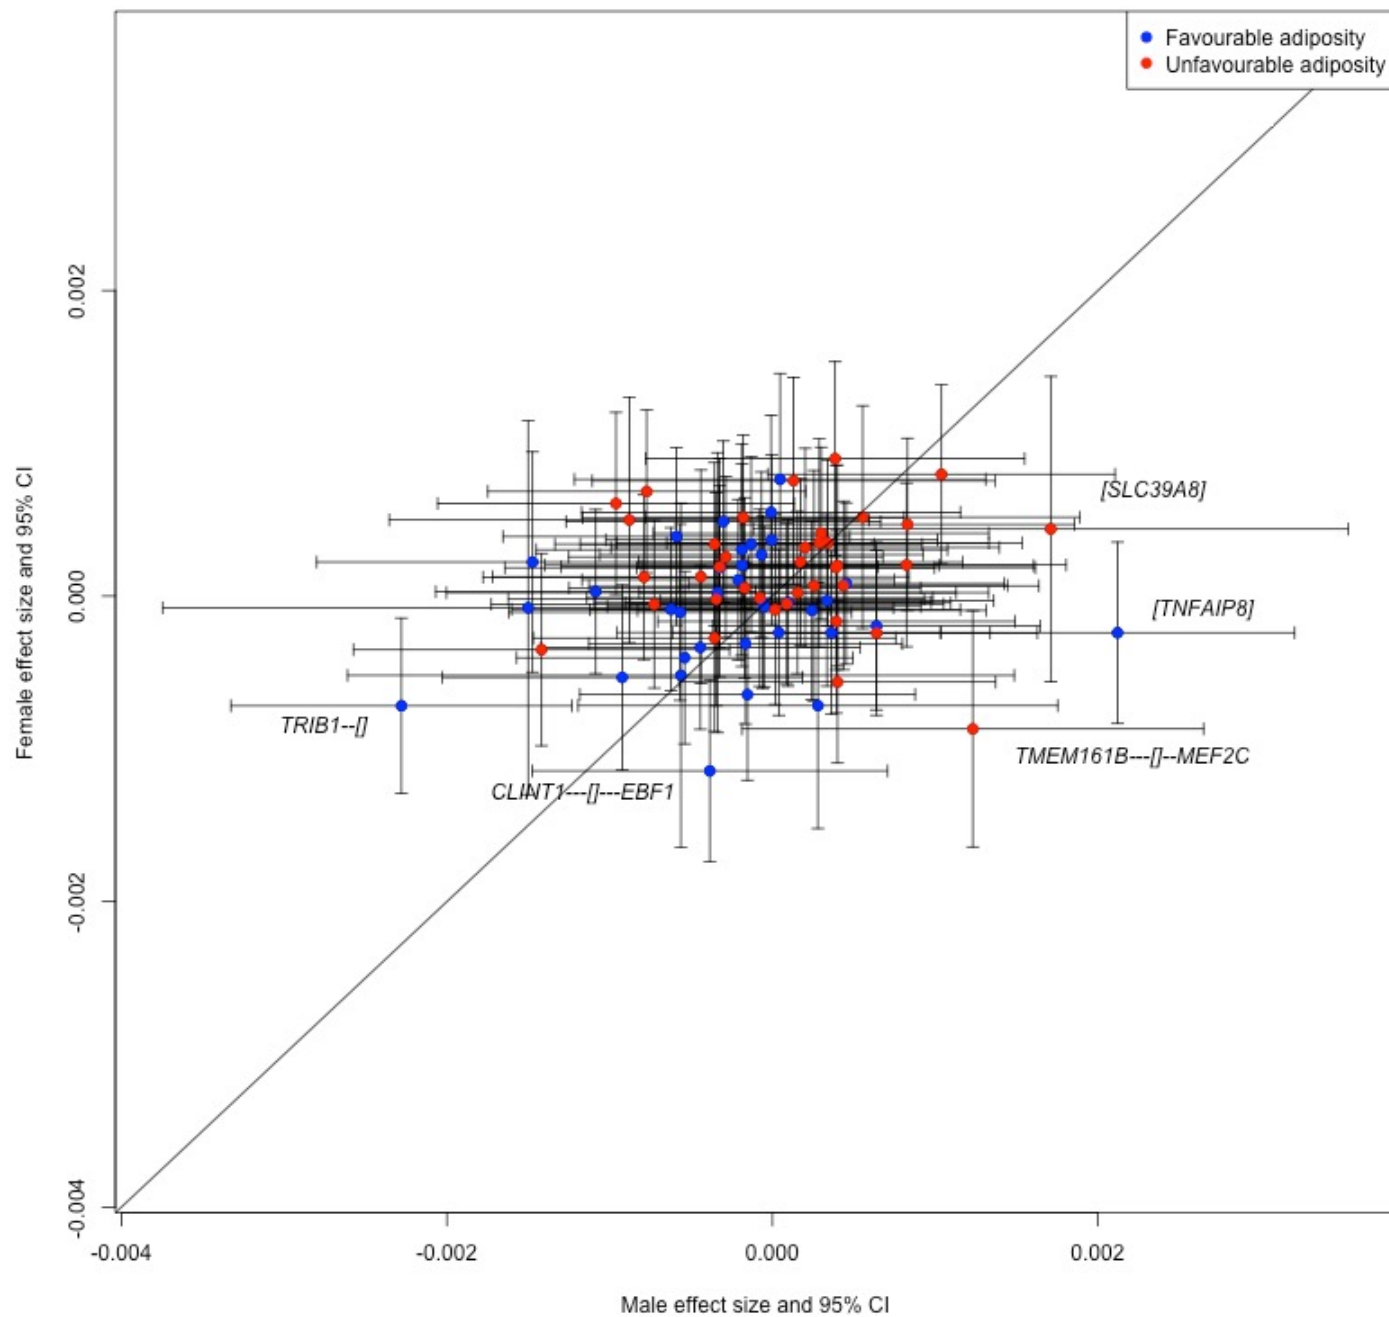

Favourable adiposity

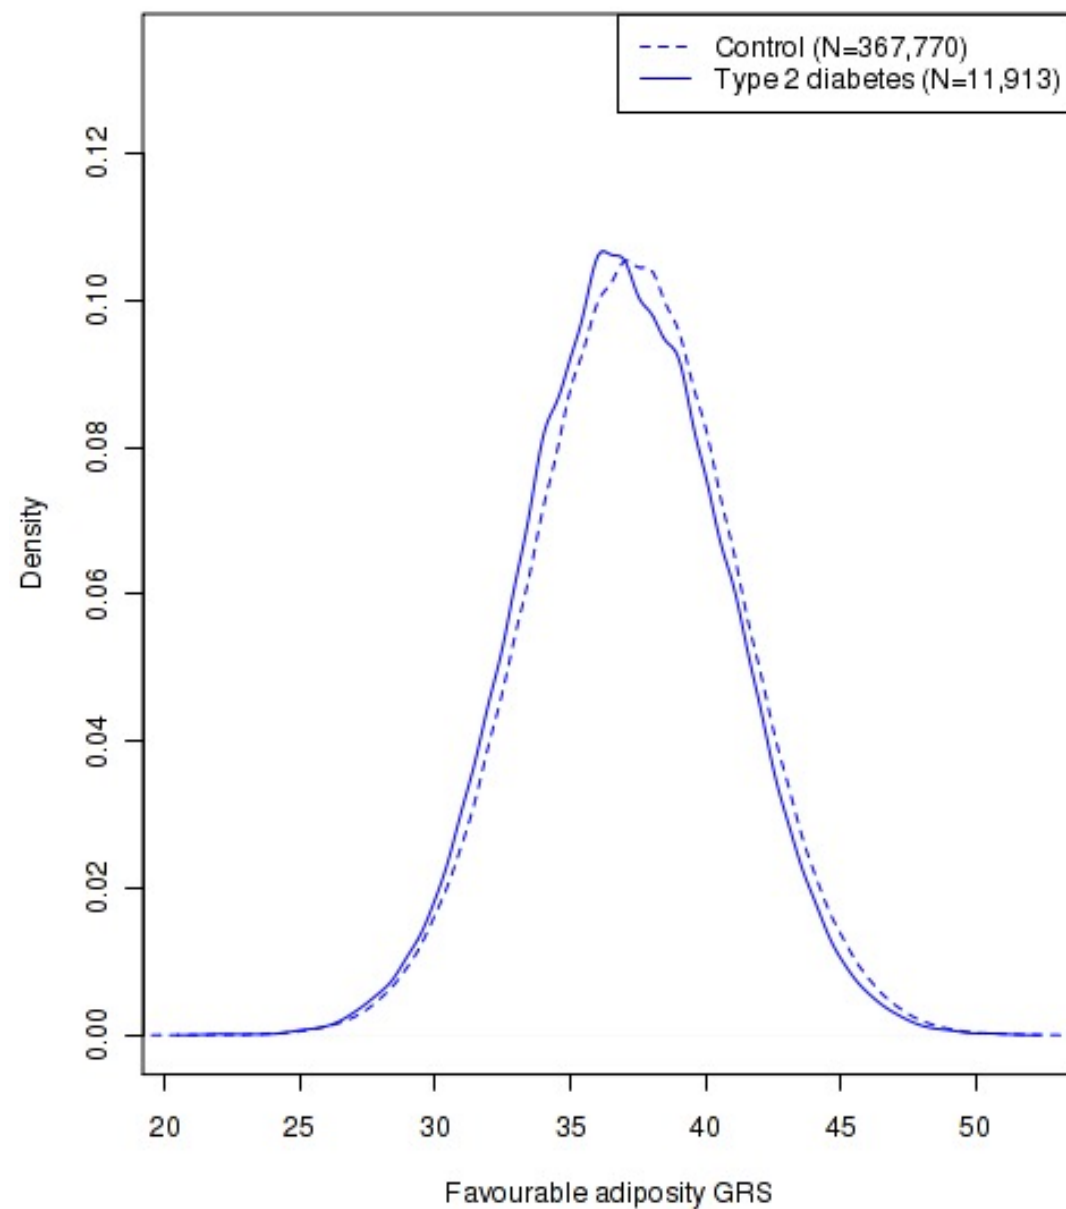

Unfavourable adiposity

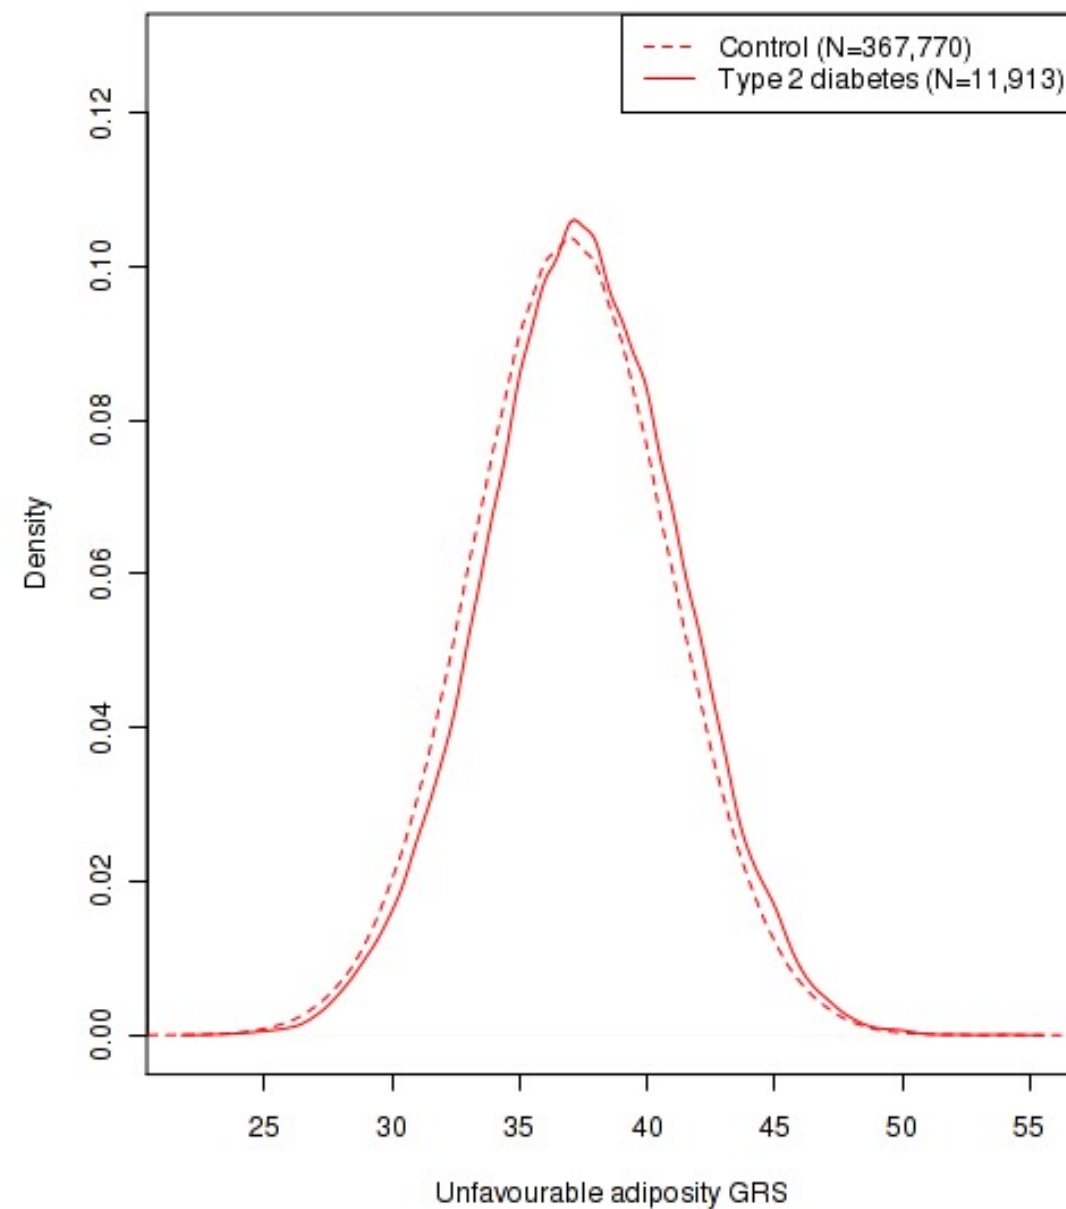



UK Biobank T2D

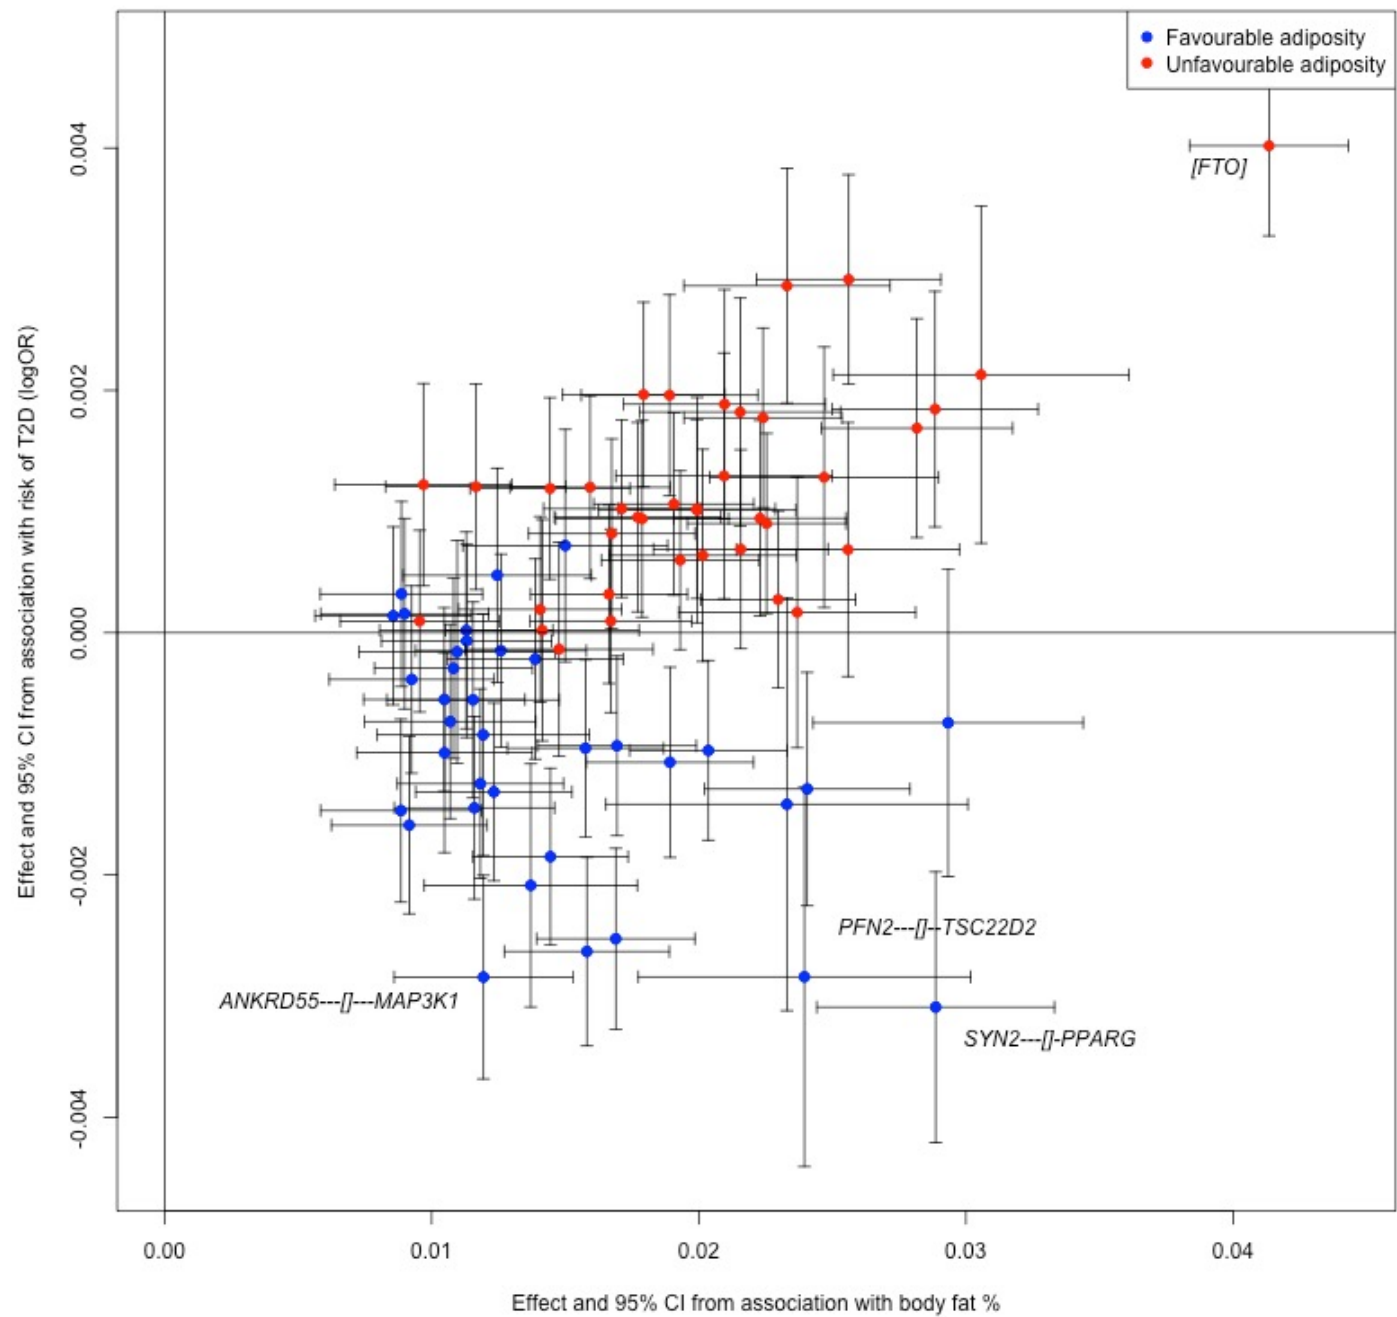

UK Biobank liver fat

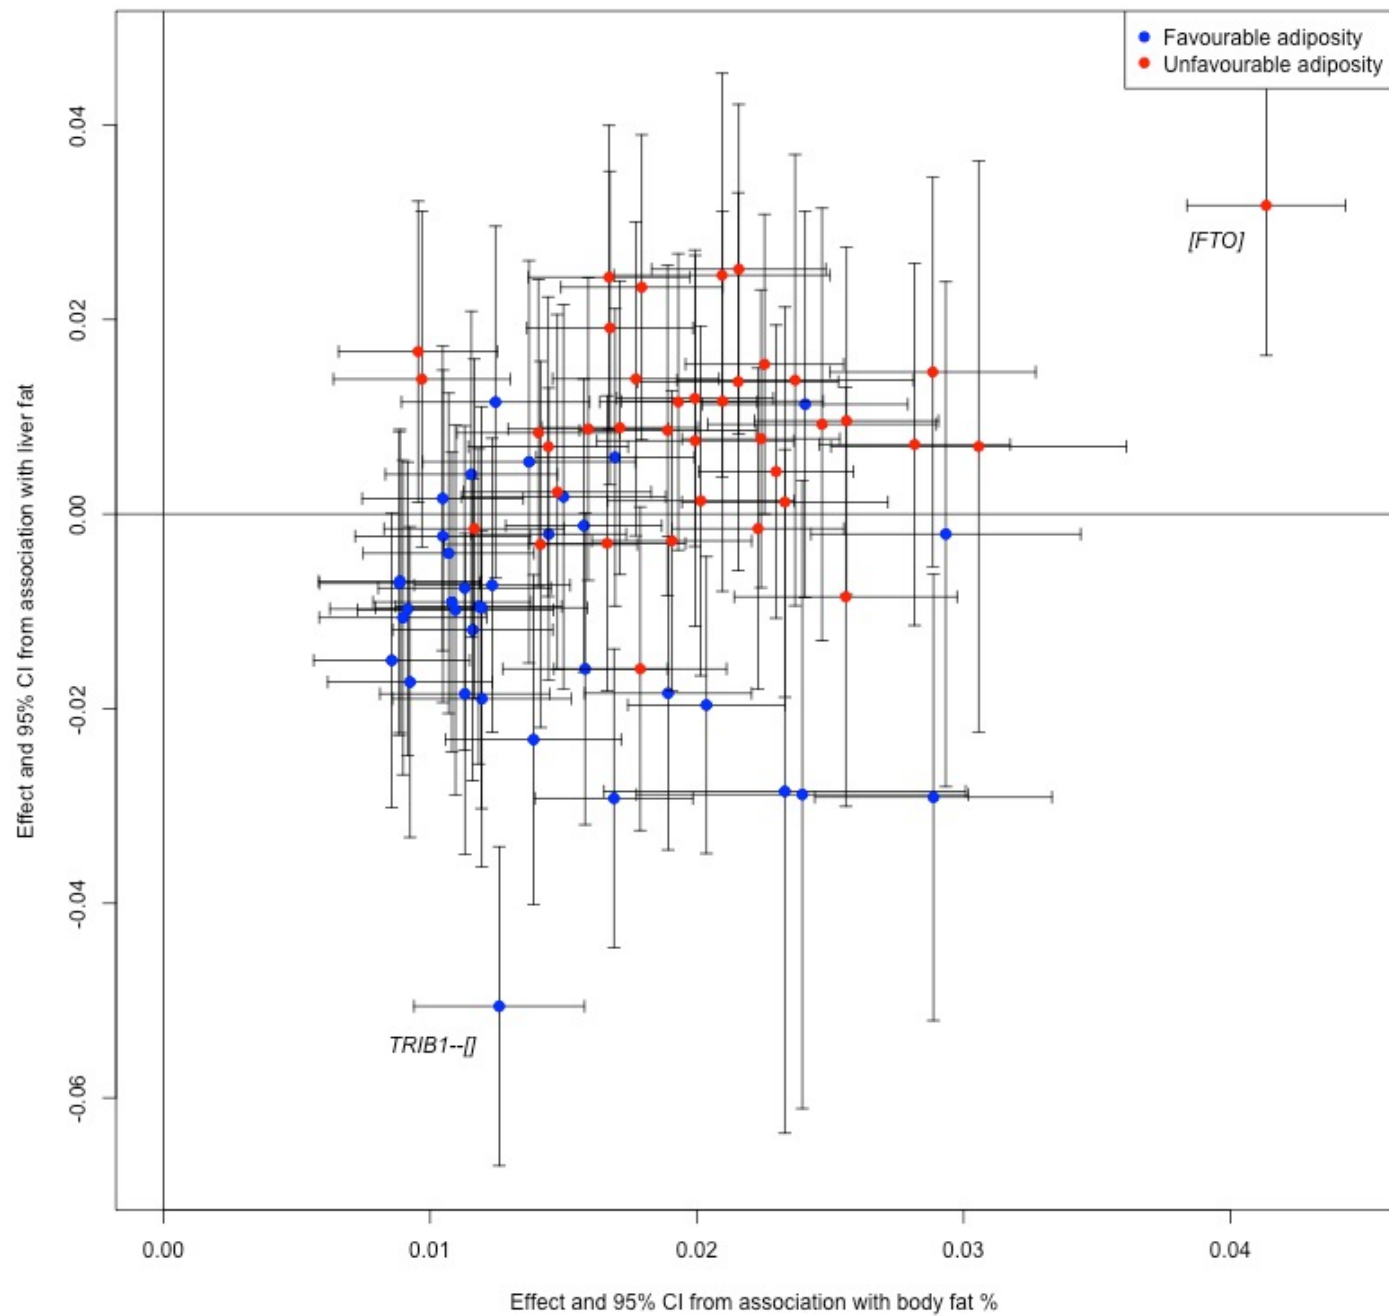

## UK Biobank pancreas fat

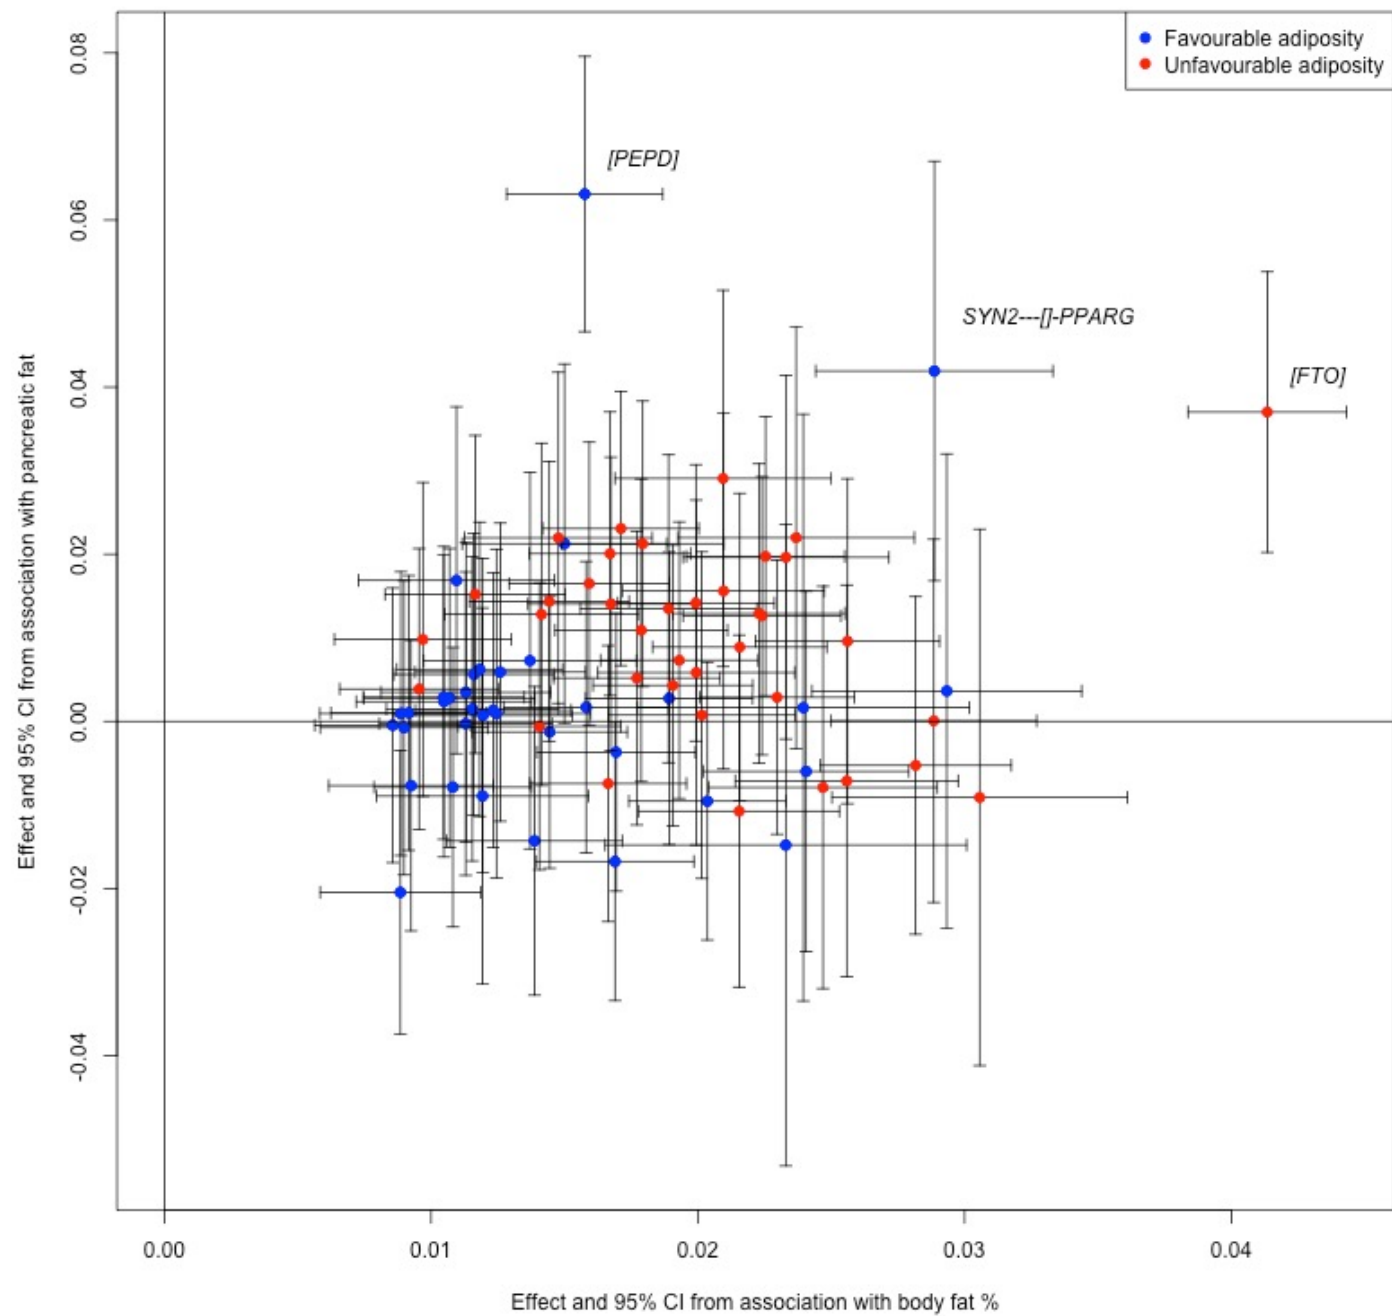

SF 8a

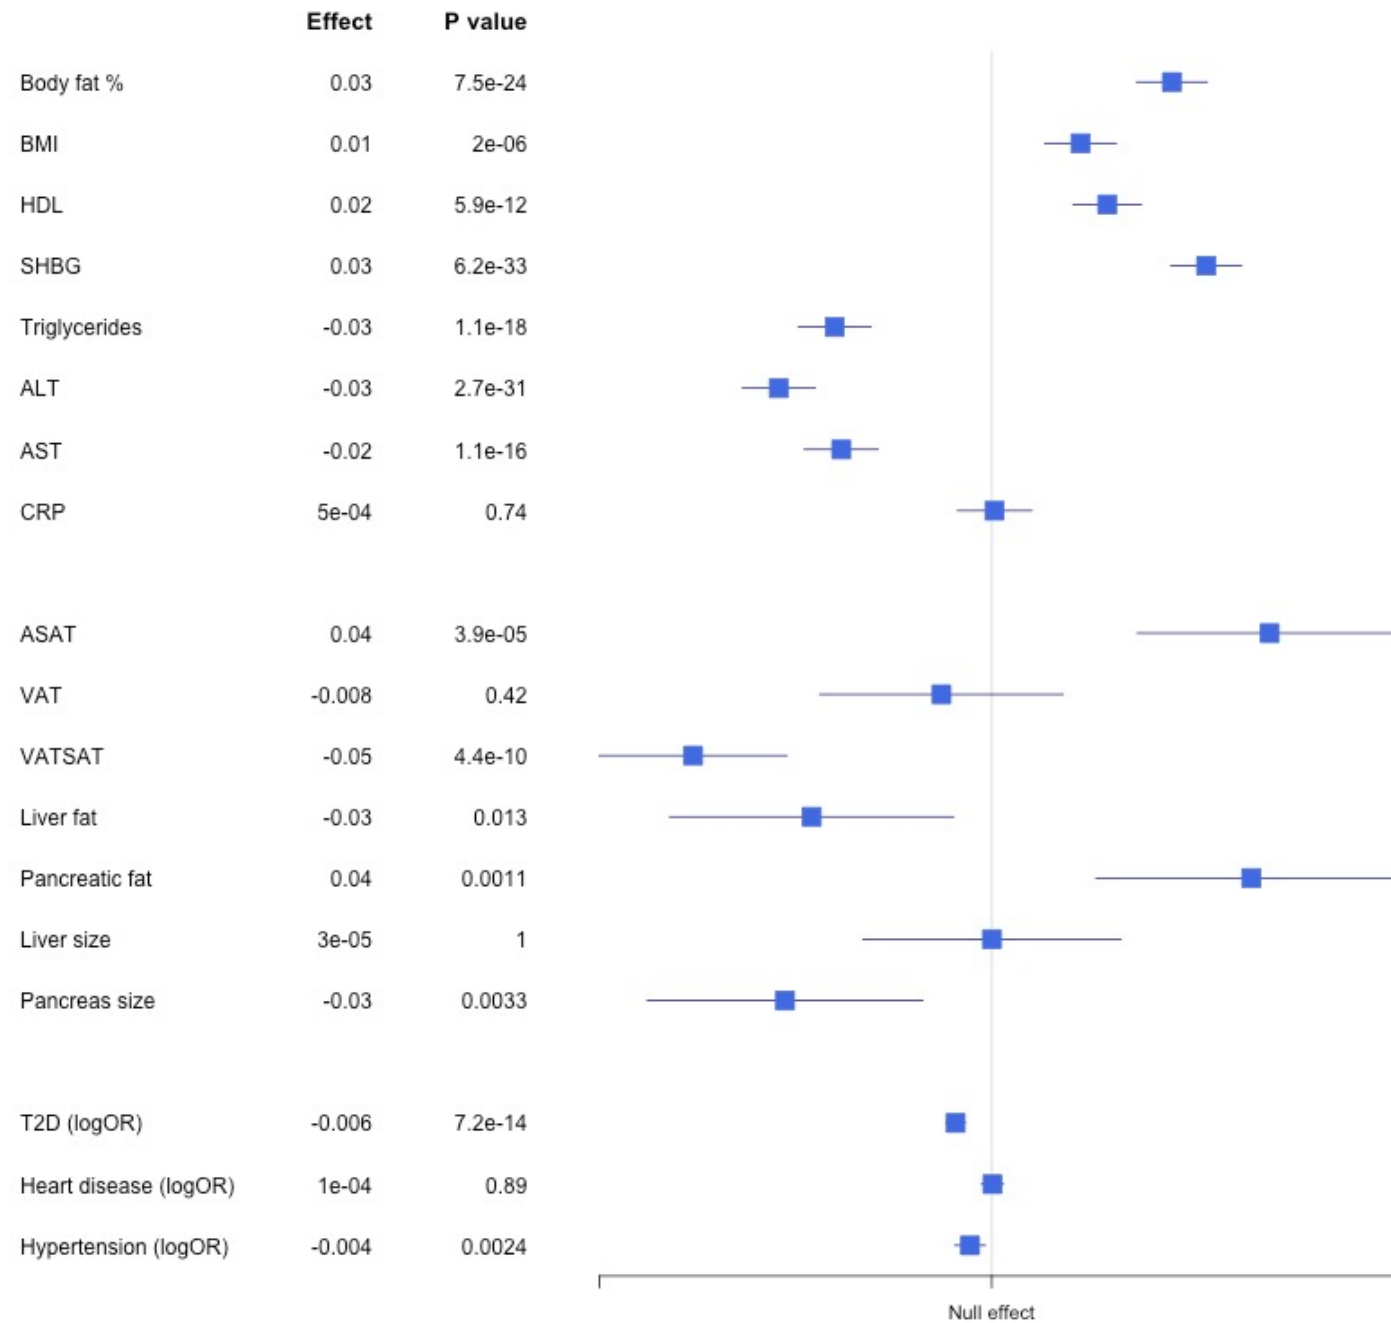

SF 8b

rs12130231 - LYPLAL1---[]---SLC30A10

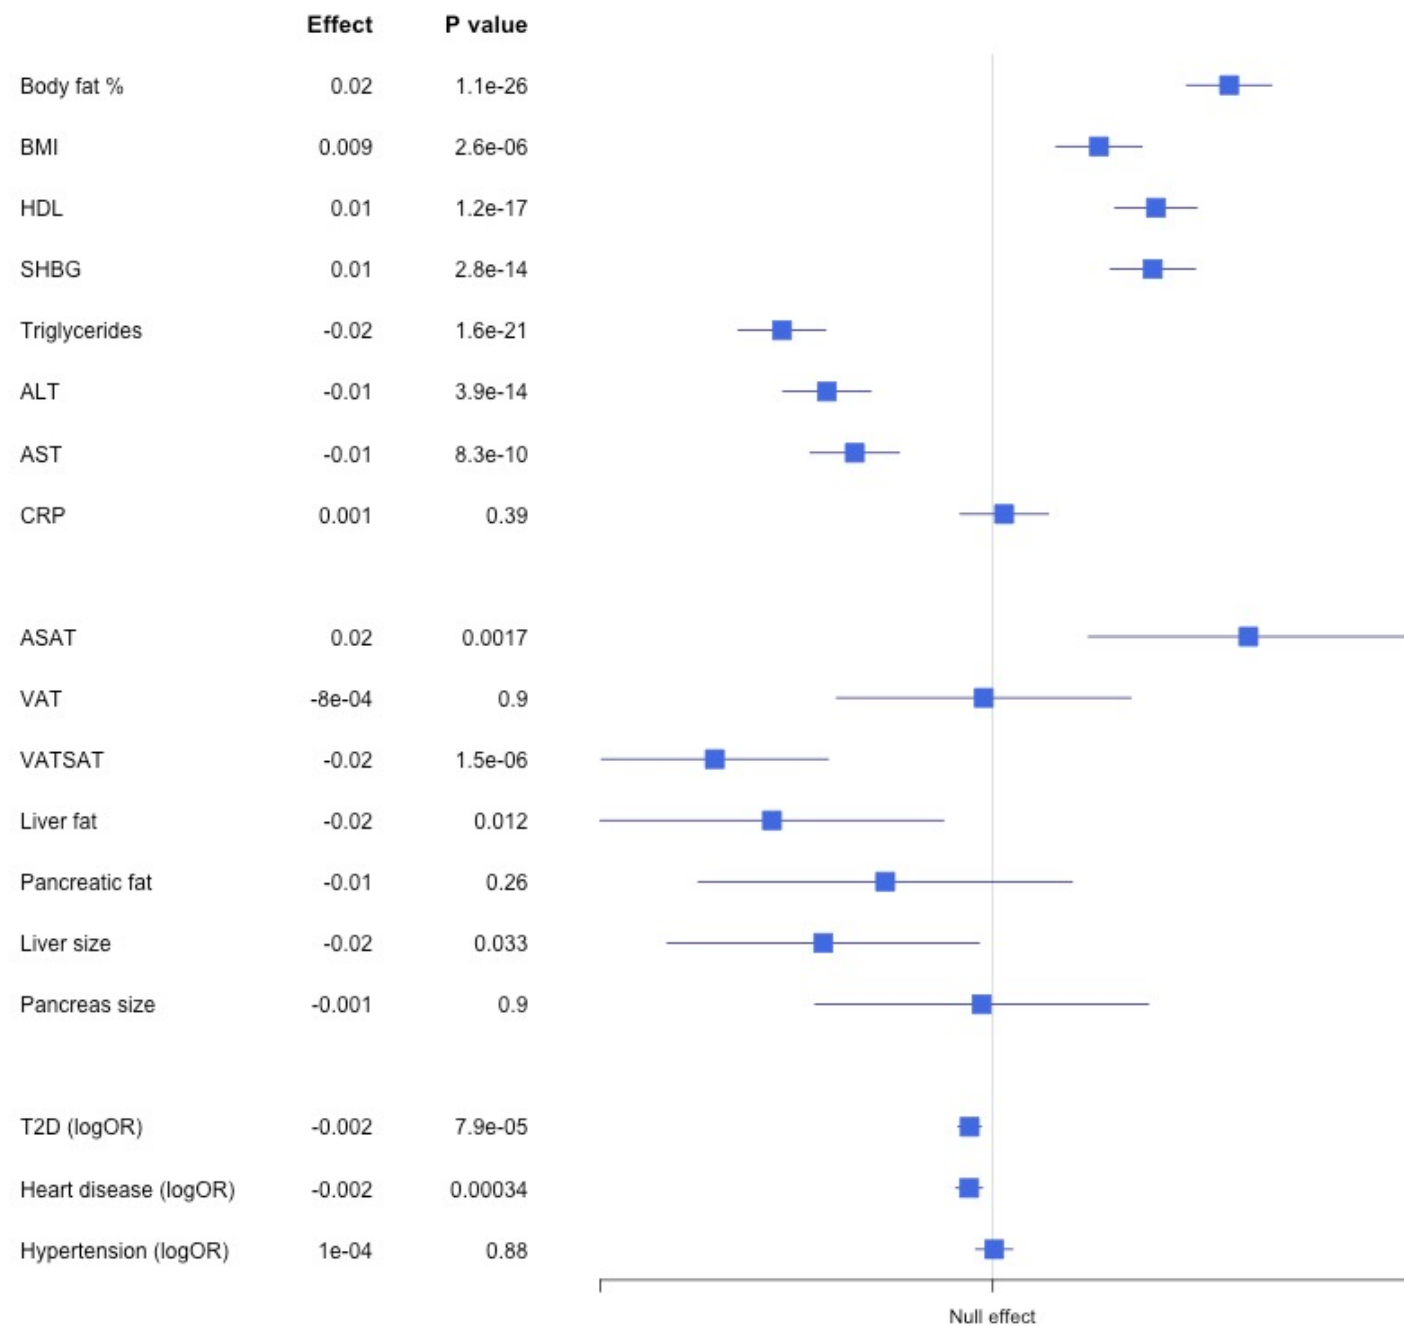

SF 8c

rs11664106 - SMCHD1-EMILIN2

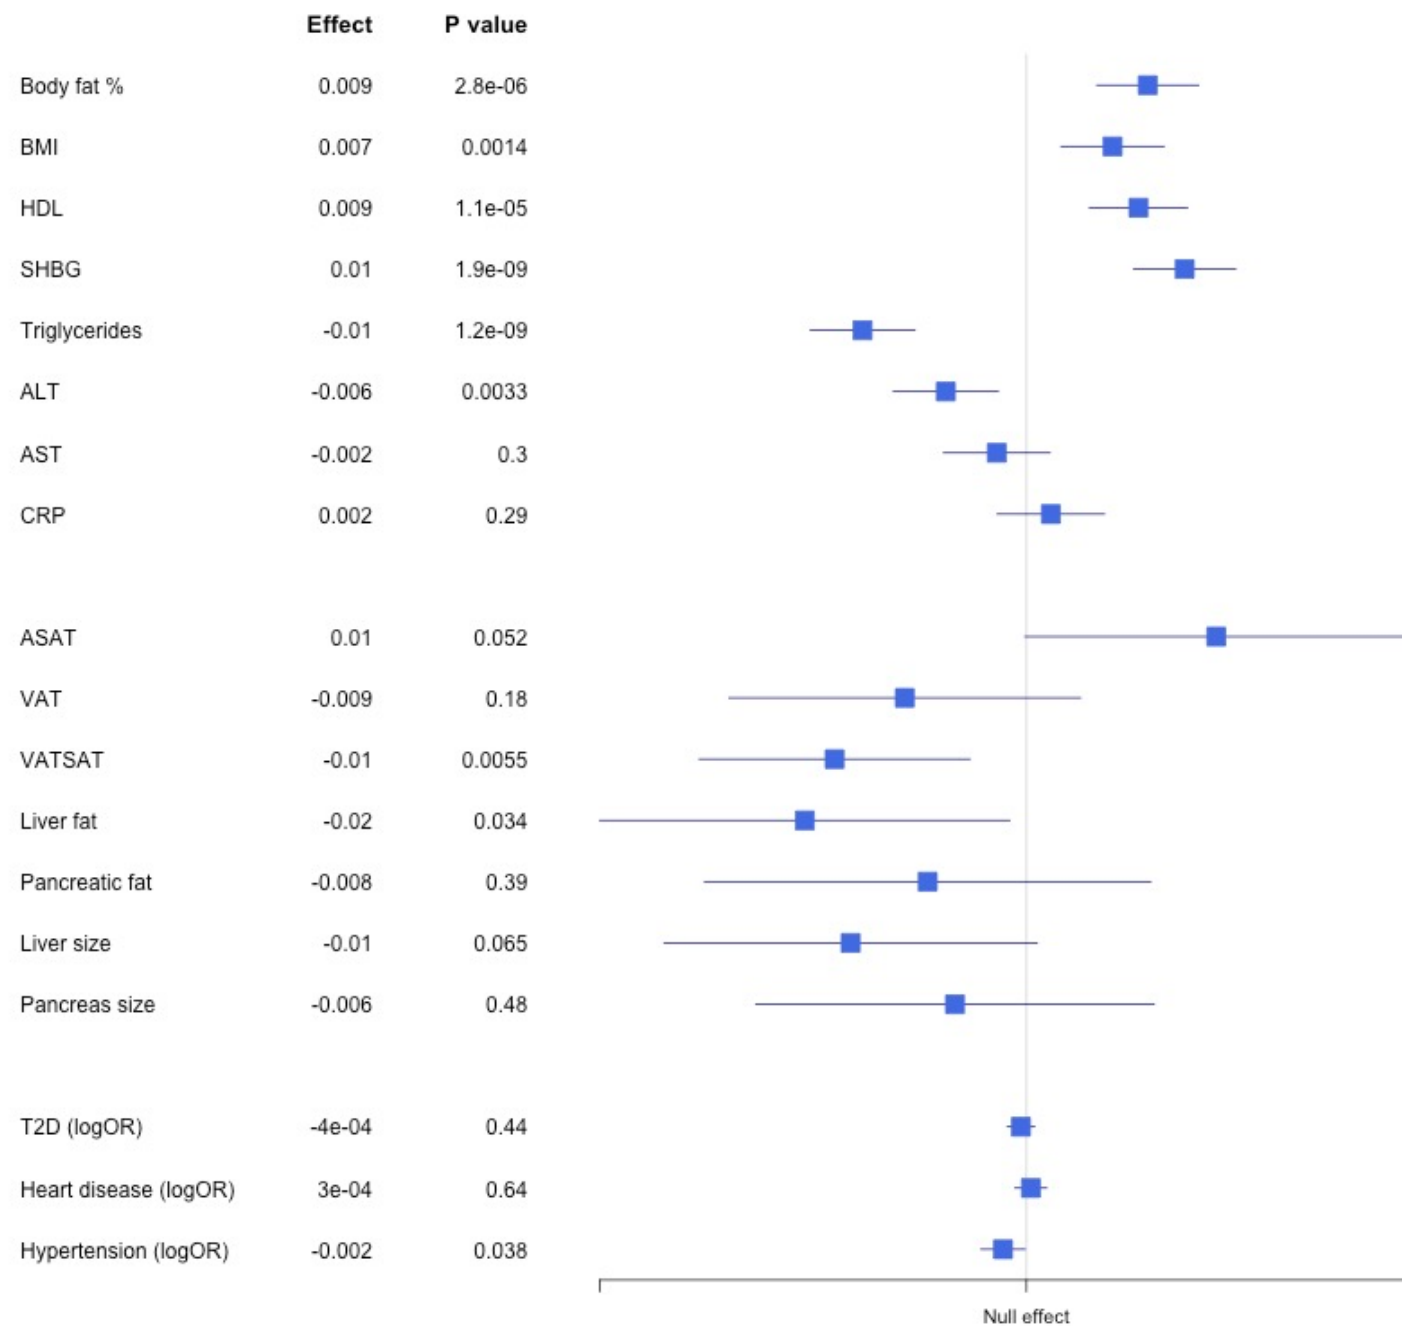

SF 8d

rs13389219 - GRB14--[]--COBLL1

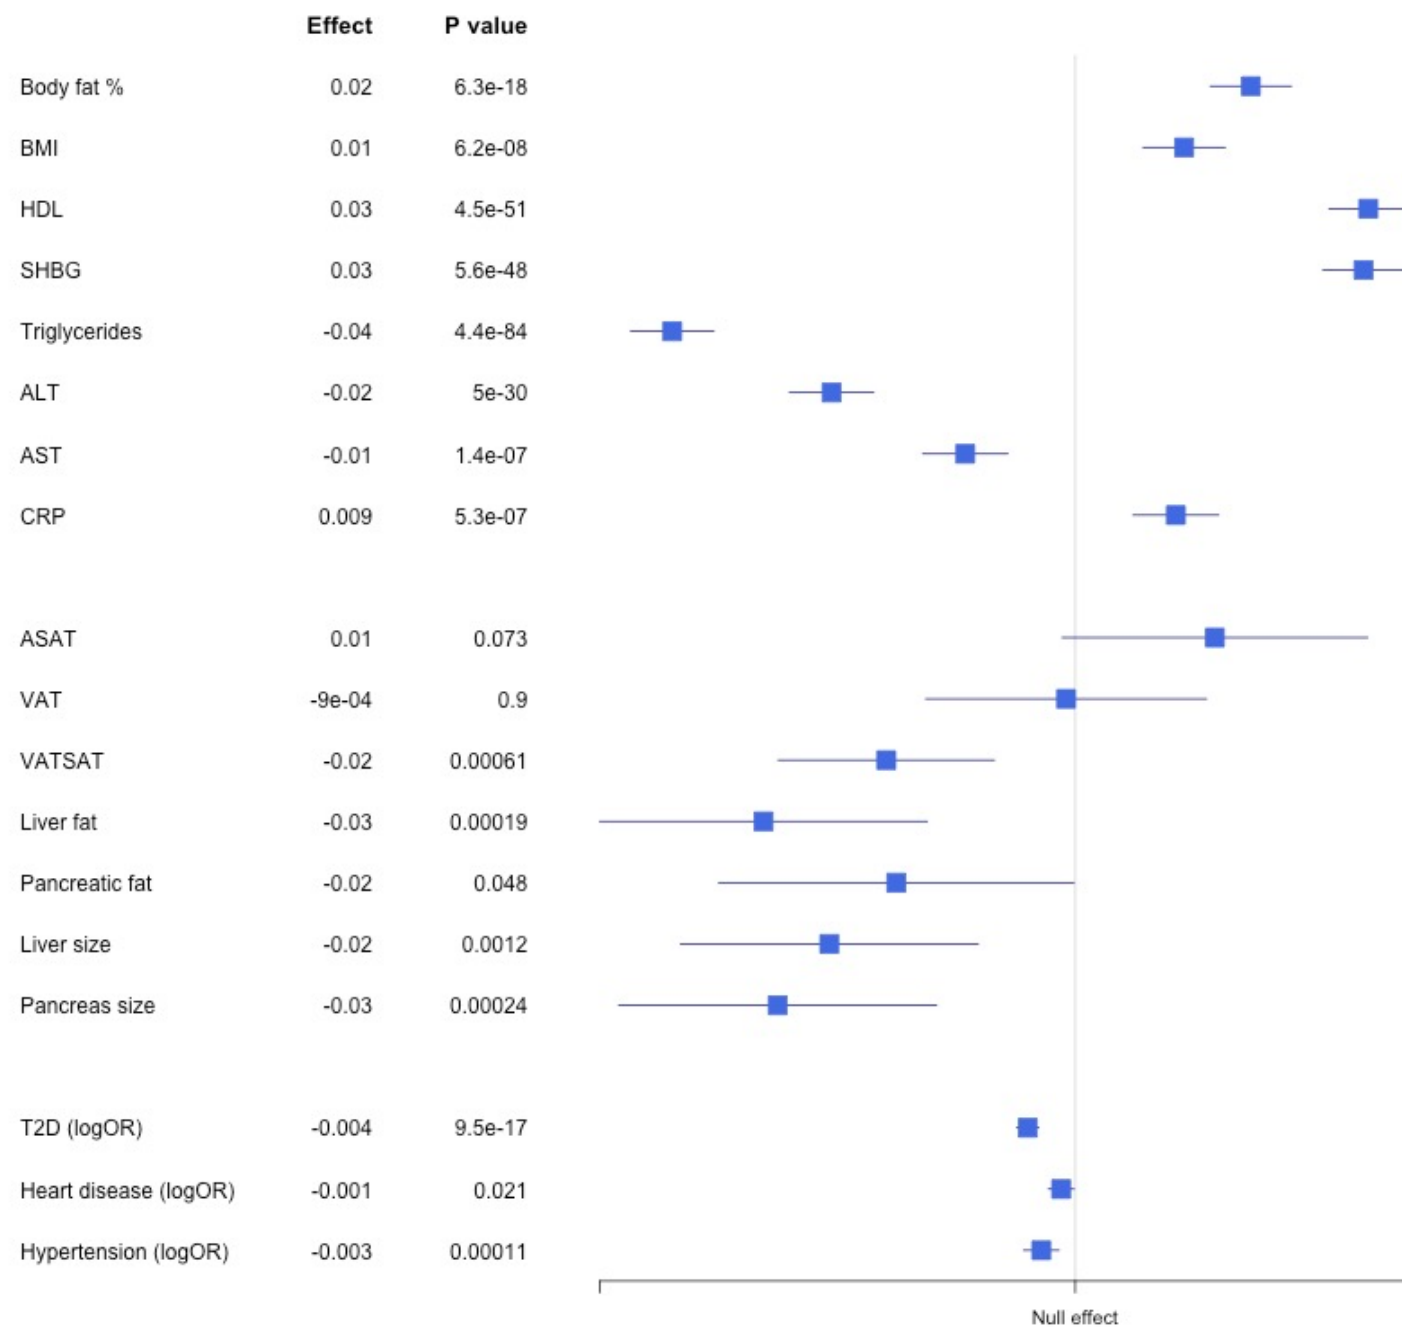

SF 8e

rs2943653 - NYAP2---[]---IRS1

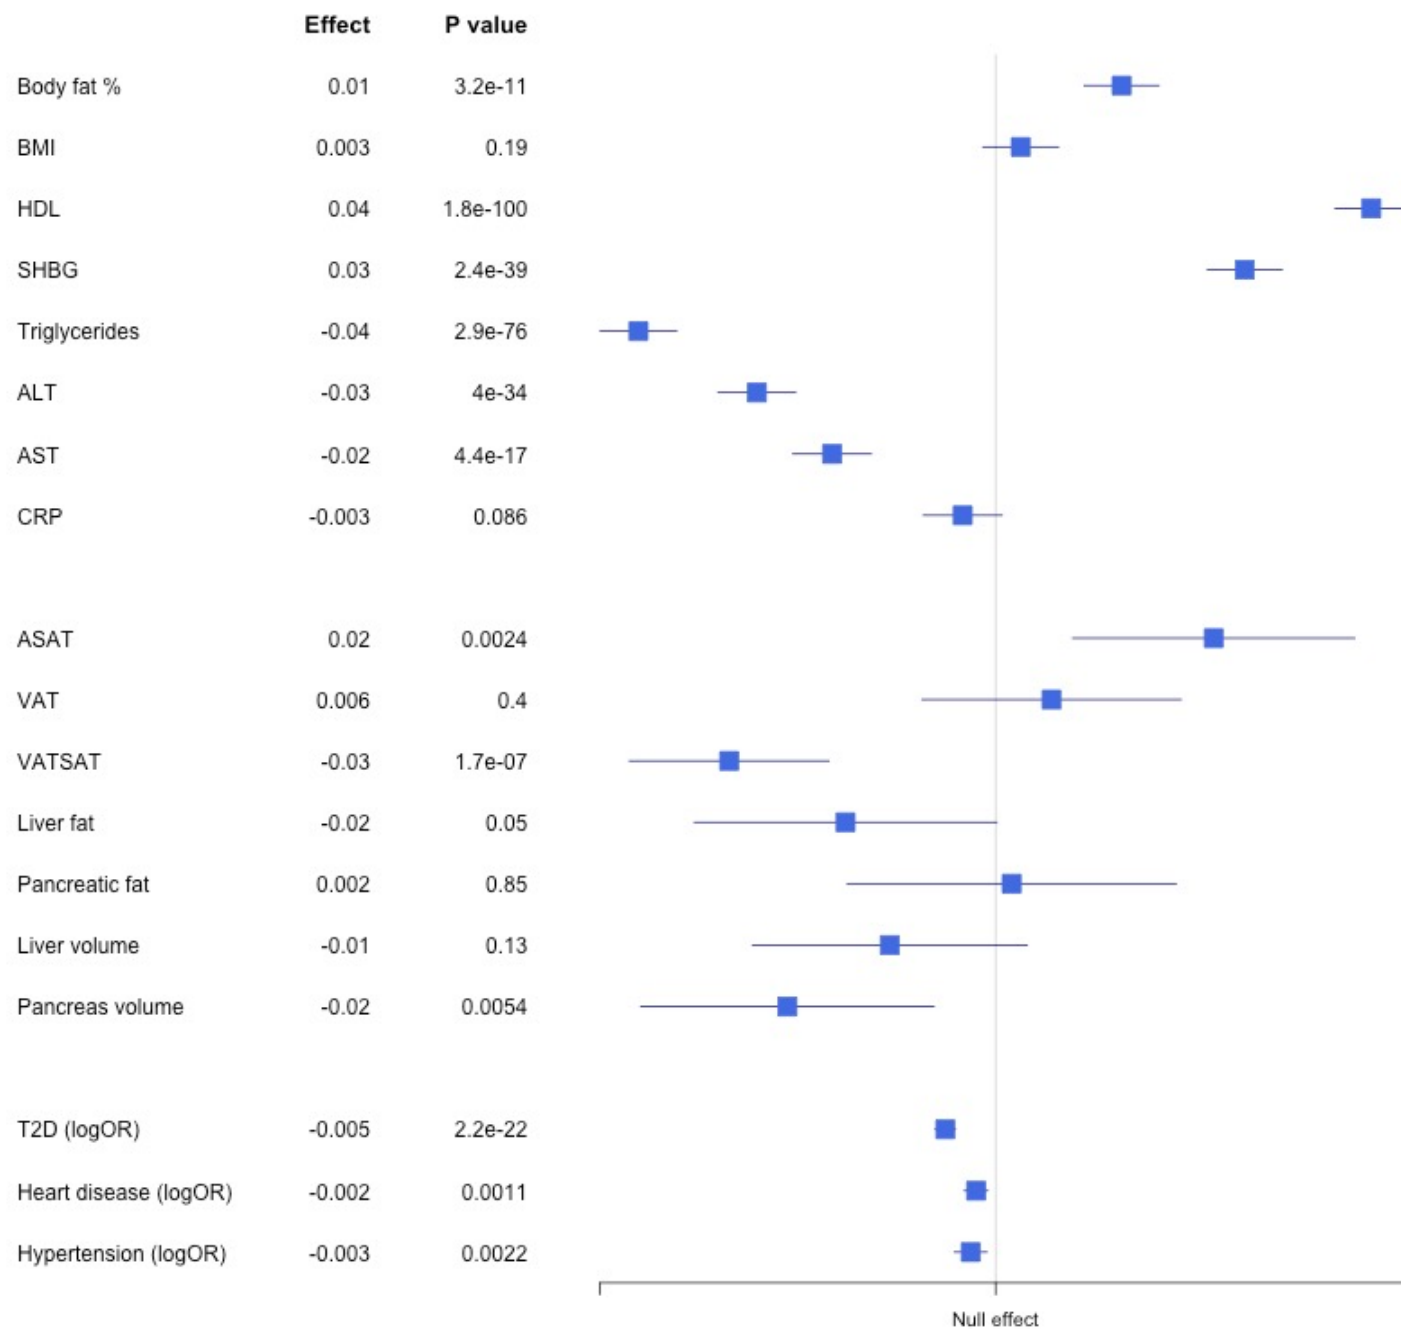



SF 8f

rs30351 - ANKRD55---[]---MAP3K1

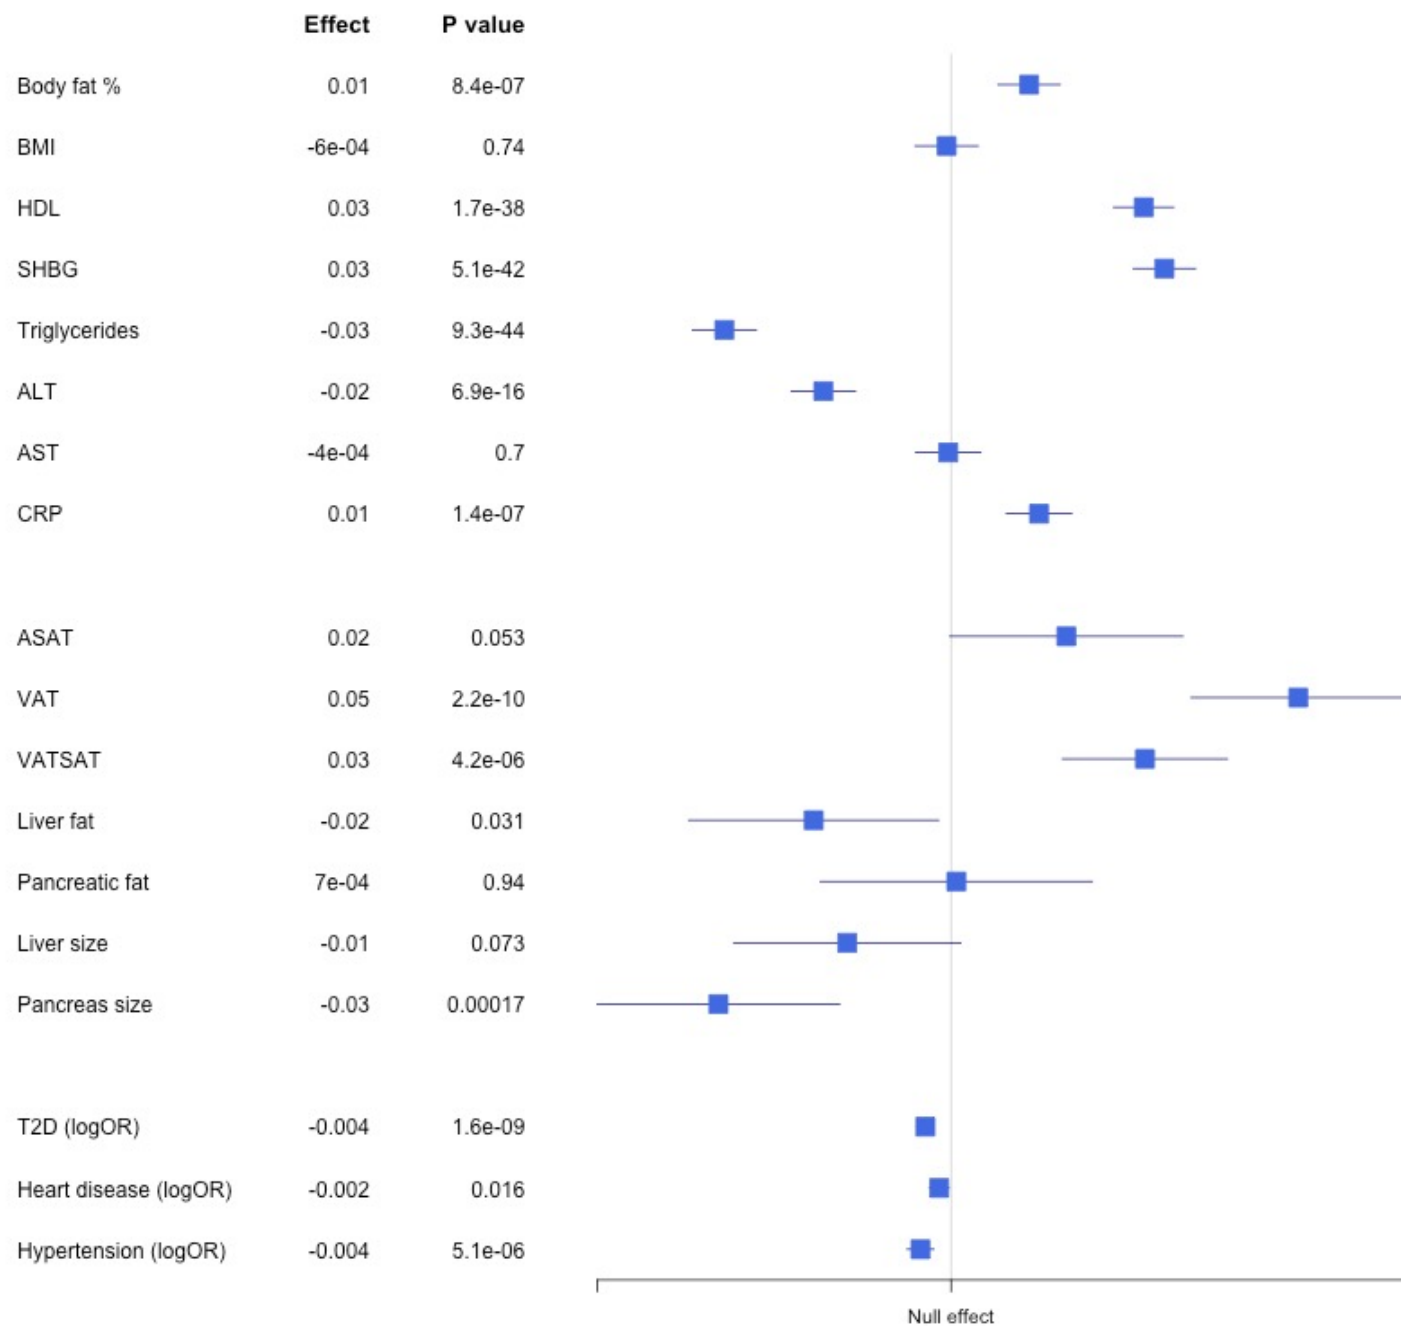

SF 8g

rs4450871 - MSX1---[]--CYTL1

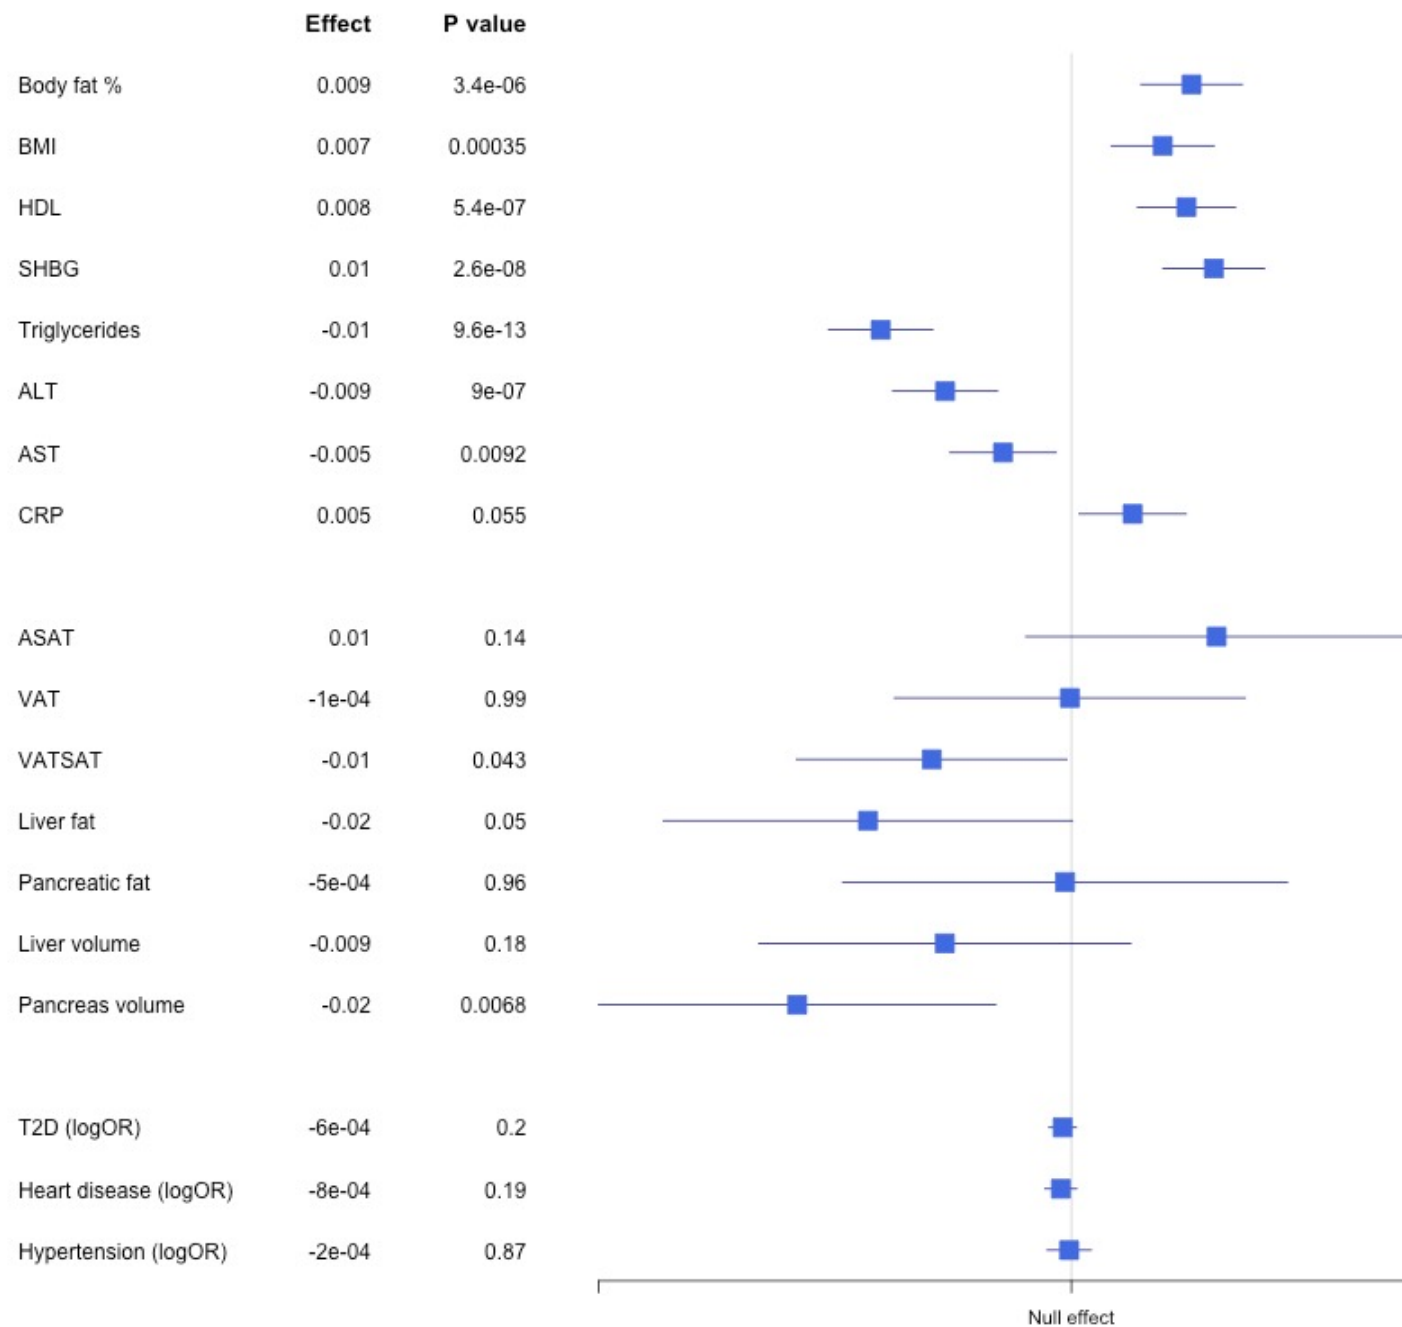

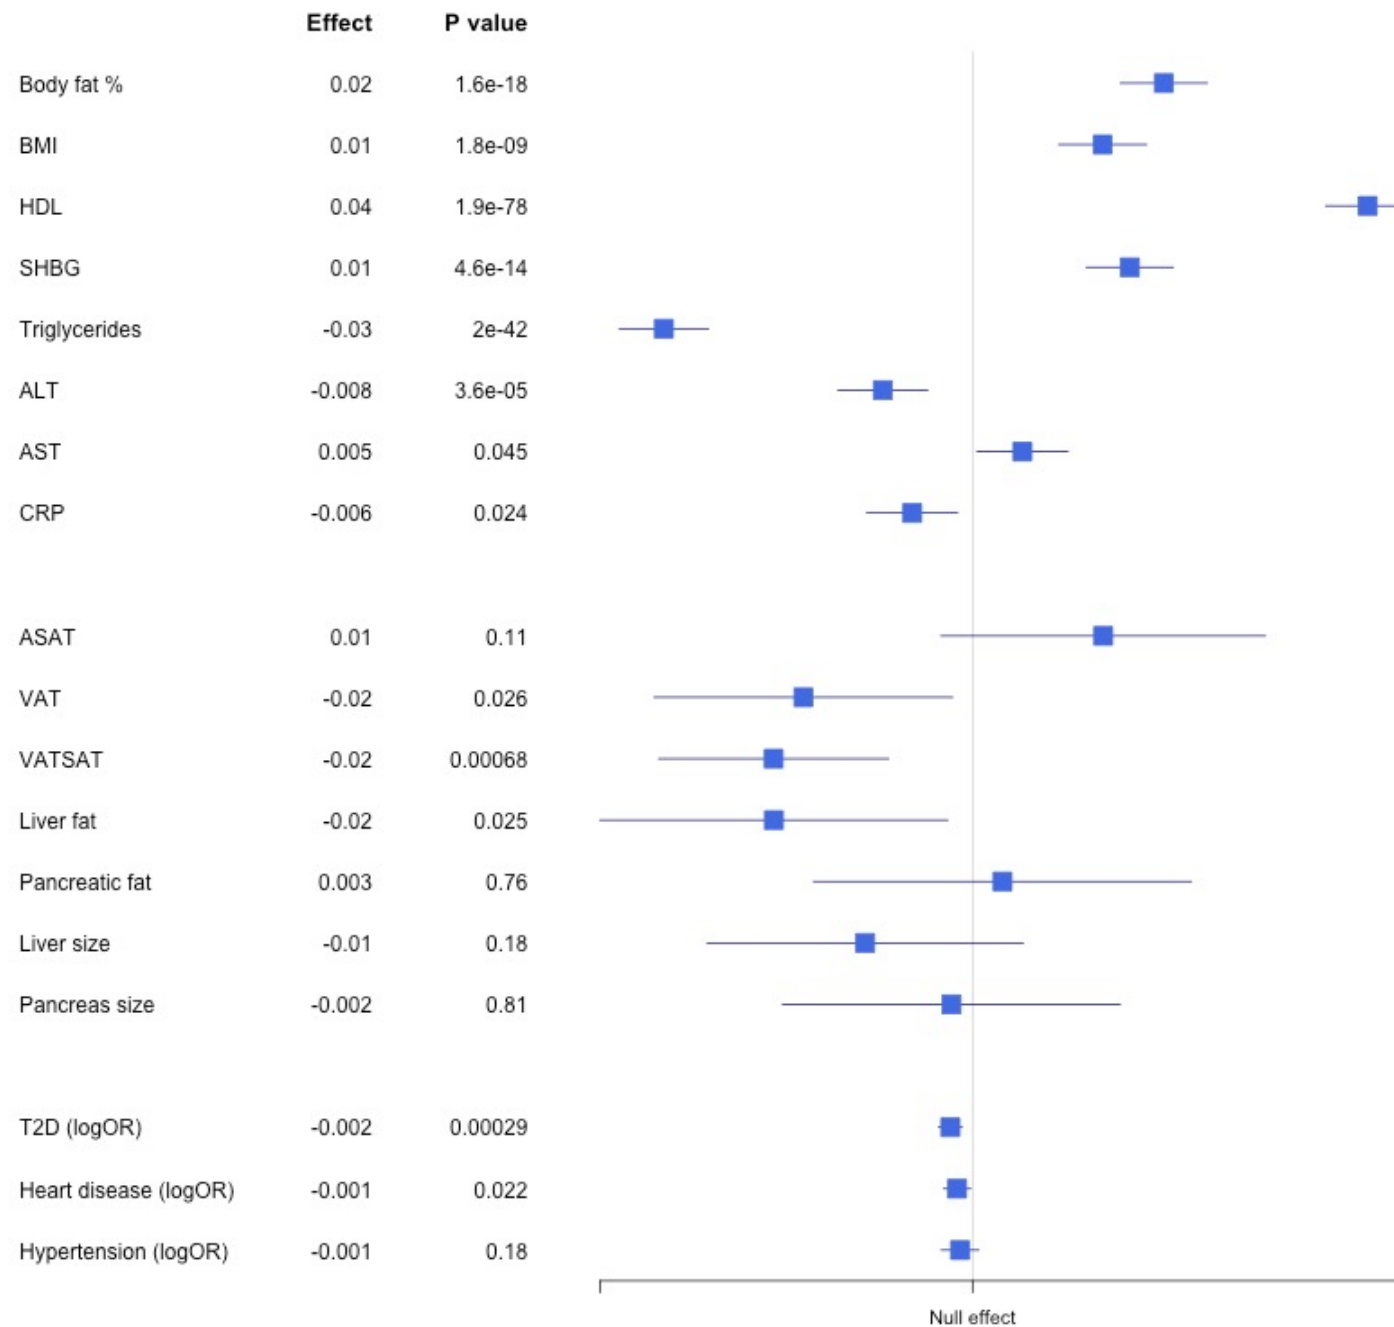

UK Biobank C-reactive protein

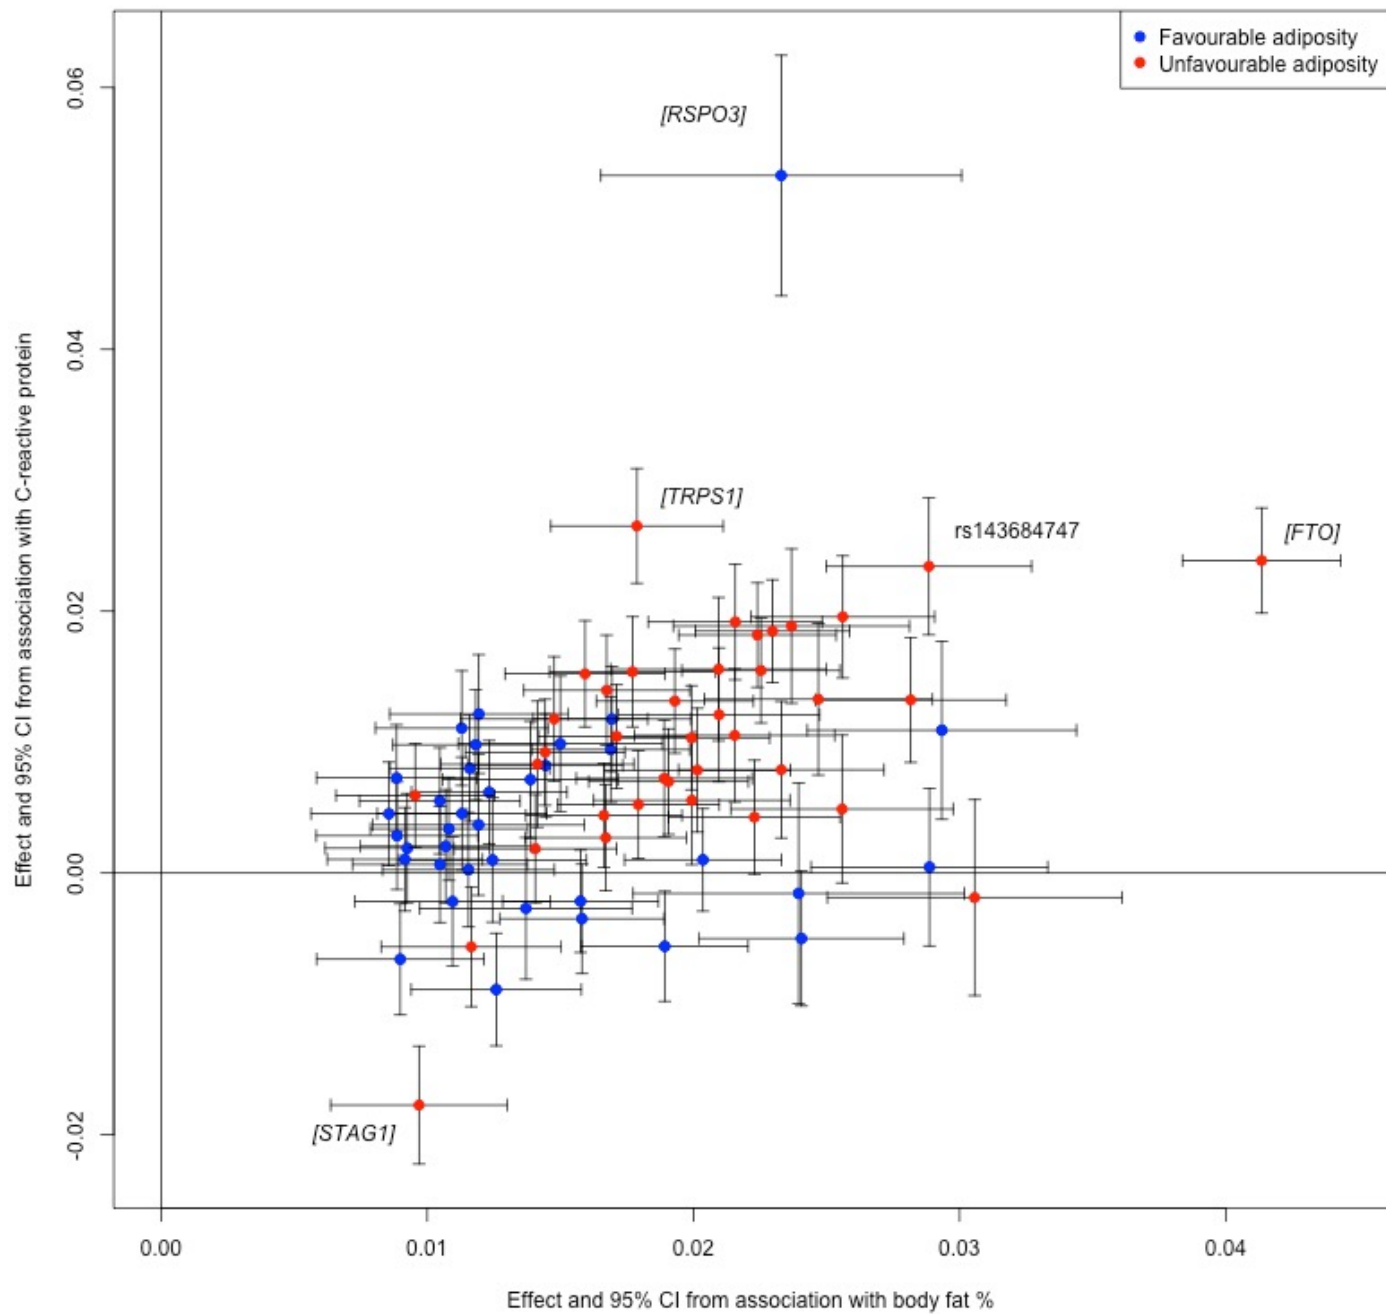

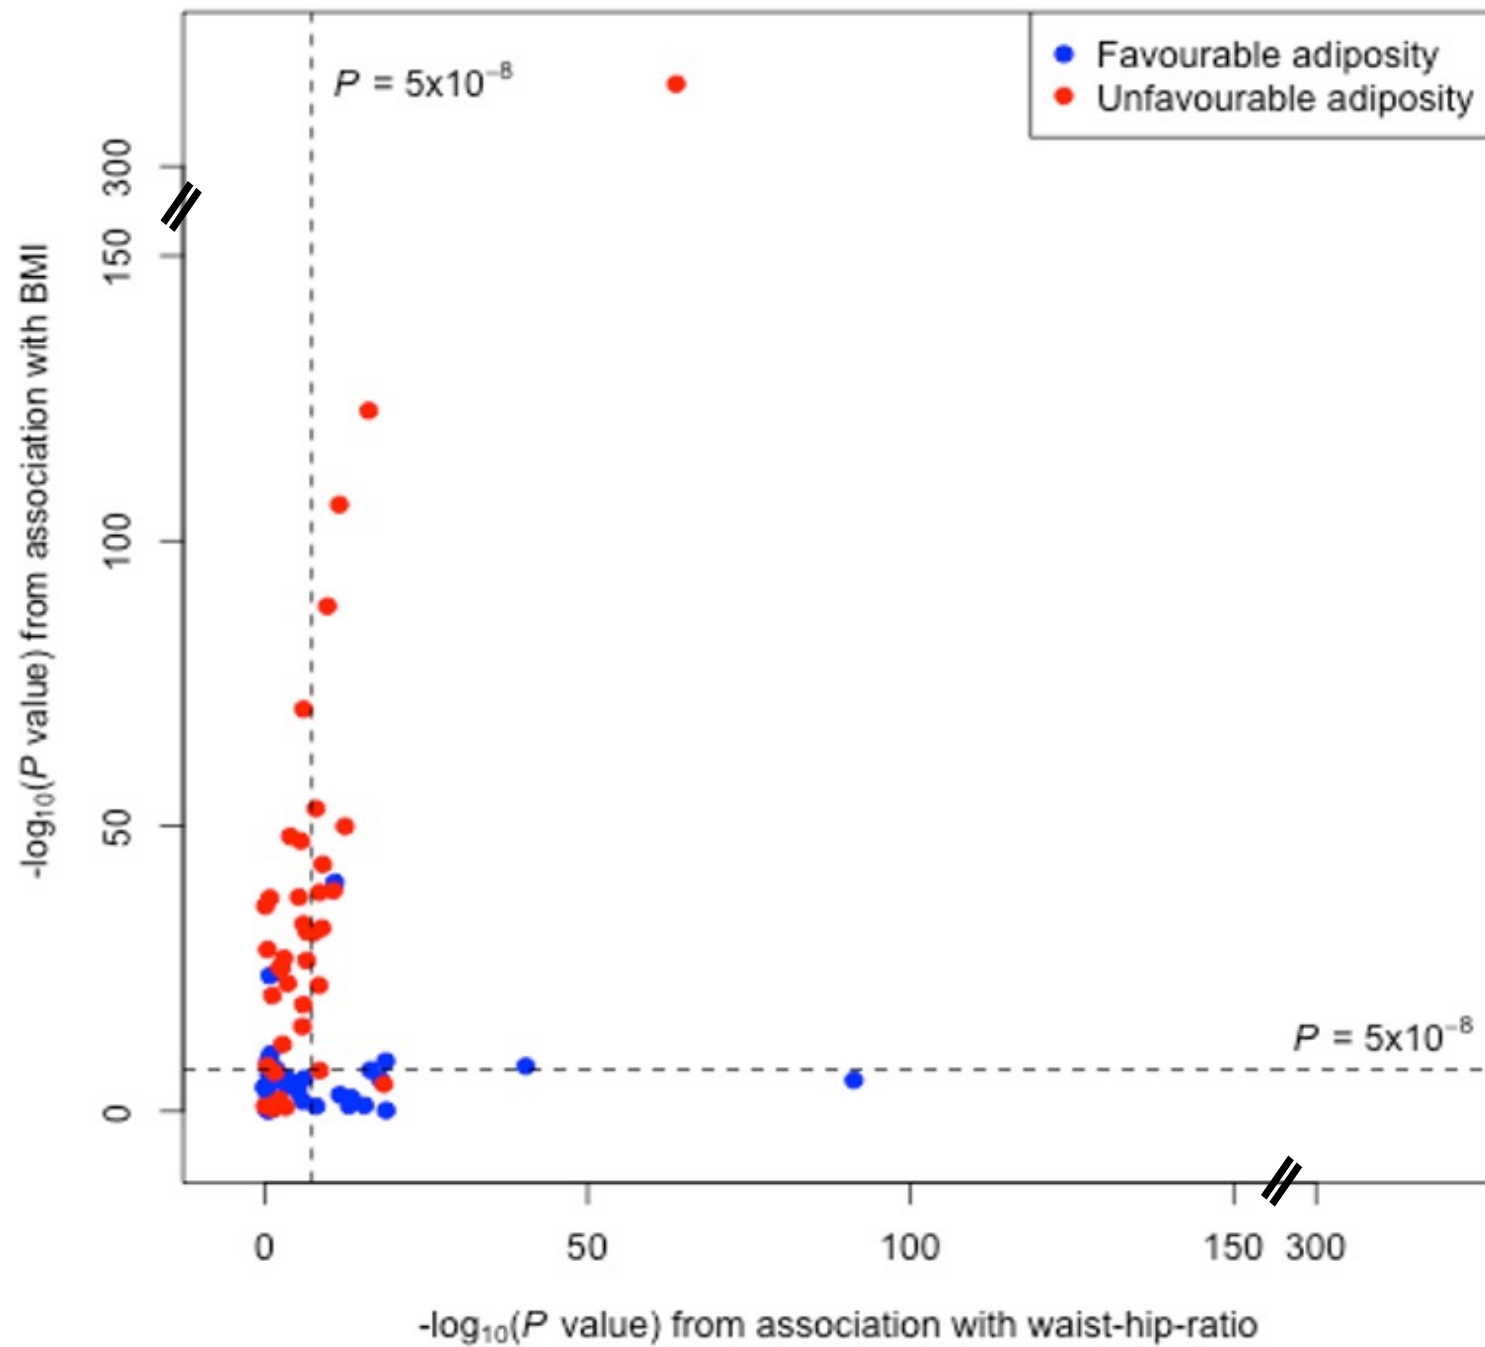

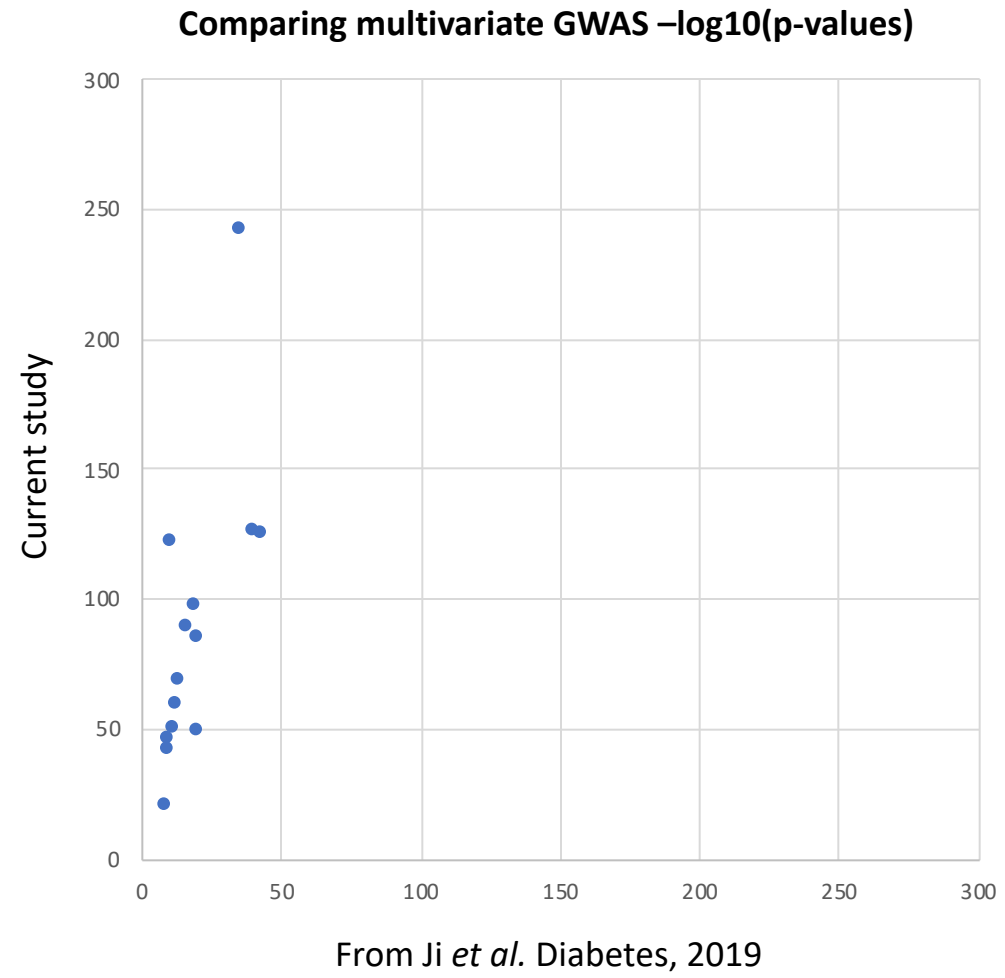

Supplement: Supplementary file 1 [file 1]
